# Supplementary material
Source: publisher site journal article supplement (https://www.dovepress.com/article/541690)
Supplement: Supplementary file 1 [file Revised%20Supplementary%20files.docx]

**Table S1. Results of the causal effect of immune cells on AGA**

| **id.exposure** | **trait** | **trait type** | **panel** | **nsnp** | **OR_**  **IVW** | **lc_95** | **uc_95** | **P**  **IVW** | **OR** | **lc_95** | **uc_95** | **p**  **MR-Egger** | **OR_**  **WM** | **lc_95** | **uc_95** | **p_**  **WM** |
| --- | --- | --- | --- | --- | --- | --- | --- | --- | --- | --- | --- | --- | --- | --- | --- | --- |
| ebi-a-GCST90001391 | IgD+ B cell %B cell | RC | B cell | 16 | 0.878 | 0.640 | 1.205 | 0.420 | 0.650 | 0.394 | 0.325 | 0.113 | 0.985 | 0.639 | 1.517 | 0.944 |
| ebi-a-GCST90001392 | IgD+ CD38+ B cell AC | AC | B cell | 29 | 0.999 | 0.894 | 1.116 | 0.987 | 0.976 | 0.864 | 0.119 | 0.700 | 0.967 | 0.847 | 1.105 | 0.622 |
| ebi-a-GCST90001393 | IgD+ CD38dim B cell %B cell | RC | B cell | 14 | 0.880 | 0.630 | 1.229 | 0.453 | 0.750 | 0.463 | 0.362 | 0.264 | 0.735 | 0.454 | 1.192 | 0.212 |
| ebi-a-GCST90001394 | IgD+ CD38dim B cell AC | AC | B cell | 24 | 0.925 | 0.824 | 1.038 | 0.185 | 0.875 | 0.765 | 0.117 | 0.063 | 0.961 | 0.827 | 1.116 | 0.601 |
| ebi-a-GCST90001395 | IgD+ CD38- B cell %B cell | RC | B cell | 22 | 0.903 | 0.771 | 1.058 | 0.208 | 0.844 | 0.707 | 0.150 | 0.077 | 0.876 | 0.655 | 1.172 | 0.374 |
| ebi-a-GCST90001396 | IgD+ CD38- B cell AC | AC | B cell | 17 | 0.926 | 0.641 | 1.337 | 0.680 | 0.655 | 0.278 | 0.560 | 0.347 | 0.940 | 0.557 | 1.586 | 0.816 |
| ebi-a-GCST90001397 | Unswitched memory B cell %B cell | RC | B cell | 30 | 0.998 | 0.806 | 1.235 | 0.986 | 1.122 | 0.839 | 0.325 | 0.444 | 0.980 | 0.757 | 1.269 | 0.877 |
| ebi-a-GCST90001398 | Unswitched memory B cell AC | AC | B cell | 18 | 0.961 | 0.616 | 1.500 | 0.861 | 0.799 | 0.289 | 0.813 | 0.672 | 0.959 | 0.520 | 1.768 | 0.892 |
| ebi-a-GCST90001399 | IgD- CD27- B cell %B cell | RC | B cell | 15 | 0.806 | 0.572 | 1.134 | 0.215 | 0.725 | 0.382 | 0.466 | 0.345 | 0.769 | 0.486 | 1.217 | 0.262 |
| ebi-a-GCST90001400 | IgD+ B cell AC | AC | B cell | 14 | 0.939 | 0.814 | 1.082 | 0.384 | 0.911 | 0.762 | 0.162 | 0.324 | 0.946 | 0.799 | 1.120 | 0.520 |
| ebi-a-GCST90001401 | IgD- CD27- B cell AC | AC | B cell | 24 | 1.133 | 0.832 | 1.542 | 0.428 | 1.127 | 0.549 | 0.811 | 0.748 | 1.064 | 0.698 | 1.622 | 0.774 |
| ebi-a-GCST90001402 | Switched memory B cell %B cell | RC | B cell | 13 | 1.085 | 0.759 | 1.549 | 0.656 | 1.071 | 0.615 | 0.594 | 0.813 | 0.944 | 0.580 | 1.536 | 0.816 |
| ebi-a-GCST90001403 | Switched memory B cell AC | AC | B cell | 22 | 1.084 | 0.837 | 1.403 | 0.541 | 1.050 | 0.729 | 0.383 | 0.796 | 1.027 | 0.708 | 1.490 | 0.888 |
| ebi-a-GCST90001404 | Plasma Blast-Plasma Cell %B cell | RC | B cell | 26 | 1.014 | 0.836 | 1.230 | 0.888 | 0.966 | 0.752 | 0.242 | 0.790 | 1.015 | 0.778 | 1.324 | 0.912 |
| ebi-a-GCST90001405 | Plasma Blast-Plasma Cell AC | AC | B cell | 24 | 1.057 | 0.904 | 1.236 | 0.490 | 1.034 | 0.860 | 0.190 | 0.728 | 1.010 | 0.813 | 1.255 | 0.928 |
| ebi-a-GCST90001406 | Memory B cell %B cell | RC | B cell | 27 | 1.092 | 0.859 | 1.388 | 0.471 | 1.131 | 0.776 | 0.427 | 0.527 | 1.083 | 0.770 | 1.522 | 0.647 |
| ebi-a-GCST90001407 | Memory B cell AC | AC | B cell | 16 | 0.955 | 0.821 | 1.111 | 0.550 | 0.915 | 0.769 | 0.158 | 0.330 | 0.937 | 0.788 | 1.115 | 0.466 |
| ebi-a-GCST90001408 | Naive-mature B cell %B cell | RC | B cell | 27 | 0.884 | 0.721 | 1.083 | 0.232 | 0.851 | 0.639 | 0.243 | 0.280 | 0.779 | 0.577 | 1.053 | 0.104 |
| ebi-a-GCST90001409 | Naive-mature B cell AC | AC | B cell | 21 | 0.913 | 0.750 | 1.110 | 0.362 | 0.833 | 0.660 | 0.194 | 0.140 | 0.869 | 0.677 | 1.115 | 0.269 |
| ebi-a-GCST90001410 | IgD- CD38+ B cell %B cell | RC | B cell | 17 | 0.862 | 0.539 | 1.379 | 0.537 | 0.987 | 0.349 | 1.025 | 0.980 | 0.782 | 0.457 | 1.338 | 0.370 |
| ebi-a-GCST90001411 | IgD+ CD24+ B cell %B cell | RC | B cell | 18 | 0.997 | 0.639 | 1.554 | 0.988 | 0.953 | 0.379 | 0.878 | 0.920 | 0.650 | 0.370 | 1.142 | 0.134 |
| ebi-a-GCST90001412 | IgD+ CD24+ B cell AC | AC | B cell | 21 | 1.552 | 1.013 | 2.379 | 0.043 | 0.805 | 0.226 | 1.021 | 0.741 | 1.689 | 1.004 | 2.844 | 0.048 |
| ebi-a-GCST90001413 | IgD- CD24- B cell %B cell | RC | B cell | 16 | 0.932 | 0.742 | 1.171 | 0.547 | 1.044 | 0.785 | 0.297 | 0.770 | 0.990 | 0.734 | 1.335 | 0.947 |
| ebi-a-GCST90001414 | IgD- CD24- B cell AC | AC | B cell | 18 | 1.159 | 0.842 | 1.595 | 0.364 | 1.023 | 0.608 | 0.532 | 0.934 | 1.177 | 0.774 | 1.790 | 0.445 |
| ebi-a-GCST90001415 | IgD+ CD24- B cell %B cell | RC | B cell | 18 | 0.916 | 0.743 | 1.129 | 0.410 | 0.921 | 0.691 | 0.264 | 0.580 | 0.836 | 0.624 | 1.121 | 0.231 |
| ebi-a-GCST90001416 | IgD+ CD24- B cell AC | AC | B cell | 21 | 0.924 | 0.821 | 1.041 | 0.195 | 0.893 | 0.774 | 0.128 | 0.140 | 0.952 | 0.818 | 1.108 | 0.528 |
| ebi-a-GCST90001417 | CD24+ CD27+ B cell %B cell | RC | B cell | 26 | 1.086 | 0.869 | 1.357 | 0.469 | 1.025 | 0.729 | 0.350 | 0.887 | 1.008 | 0.731 | 1.391 | 0.959 |
| ebi-a-GCST90001418 | CD24+ CD27+ B cell AC | AC | B cell | 25 | 0.914 | 0.790 | 1.058 | 0.230 | 0.914 | 0.771 | 0.155 | 0.309 | 0.937 | 0.783 | 1.121 | 0.474 |
| ebi-a-GCST90001419 | CD20- B cell %B cell | RC | B cell | 19 | 0.935 | 0.722 | 1.210 | 0.608 | 1.134 | 0.786 | 0.416 | 0.512 | 1.032 | 0.736 | 1.447 | 0.856 |
| ebi-a-GCST90001420 | IgD- CD38+ B cell AC | AC | B cell | 20 | 0.940 | 0.768 | 1.150 | 0.548 | 1.071 | 0.832 | 0.270 | 0.601 | 1.020 | 0.776 | 1.340 | 0.889 |
| ebi-a-GCST90001421 | CD20- B cell AC | AC | B cell | 22 | 1.000 | 0.853 | 1.173 | 0.997 | 1.047 | 0.865 | 0.200 | 0.642 | 1.021 | 0.842 | 1.238 | 0.832 |
| ebi-a-GCST90001422 | CD20- CD38- B cell %B cell | RC | B cell | 23 | 0.973 | 0.793 | 1.194 | 0.795 | 0.996 | 0.759 | 0.271 | 0.979 | 0.965 | 0.730 | 1.277 | 0.804 |
| ebi-a-GCST90001423 | CD20- CD38- B cell AC | AC | B cell | 14 | 0.817 | 0.527 | 1.267 | 0.366 | 0.627 | 0.277 | 0.512 | 0.285 | 0.918 | 0.484 | 1.739 | 0.792 |
| ebi-a-GCST90001424 | IgD+ B cell %Lymphocyte | RC | B cell | 17 | 1.043 | 0.888 | 1.225 | 0.610 | 1.018 | 0.843 | 0.192 | 0.858 | 1.021 | 0.843 | 1.237 | 0.832 |
| ebi-a-GCST90001425 | IgD- CD38+ B cell %lymphocyte | RC | B cell | 28 | 0.884 | 0.731 | 1.069 | 0.205 | 1.009 | 0.802 | 0.231 | 0.939 | 0.990 | 0.763 | 1.285 | 0.942 |
| ebi-a-GCST90001426 | IgD- CD38dim B cell %lymphocyte | RC | B cell | 23 | 0.935 | 0.776 | 1.128 | 0.485 | 0.865 | 0.684 | 0.204 | 0.243 | 0.904 | 0.700 | 1.166 | 0.437 |
| ebi-a-GCST90001427 | IgD- CD38- B cell %lymphocyte | RC | B cell | 27 | 1.166 | 0.871 | 1.561 | 0.303 | 1.141 | 0.692 | 0.570 | 0.610 | 0.983 | 0.632 | 1.530 | 0.941 |
| ebi-a-GCST90001428 | IgD- CD38dim B cell %B cell | RC | B cell | 25 | 0.954 | 0.821 | 1.108 | 0.533 | 0.937 | 0.783 | 0.168 | 0.482 | 0.927 | 0.755 | 1.137 | 0.466 |
| ebi-a-GCST90001429 | IgD+ CD38+ B cell %lymphocyte | RC | B cell | 24 | 1.069 | 0.834 | 1.371 | 0.596 | 0.921 | 0.641 | 0.334 | 0.662 | 1.015 | 0.700 | 1.470 | 0.939 |
| ebi-a-GCST90001430 | IgD+ CD38dim B cell %lymphocyte | RC | B cell | 33 | 1.022 | 0.906 | 1.153 | 0.721 | 0.981 | 0.854 | 0.136 | 0.786 | 1.013 | 0.856 | 1.198 | 0.883 |
| ebi-a-GCST90001431 | IgD+ CD38- B cell %lymphocyte | RC | B cell | 19 | 1.109 | 0.876 | 1.404 | 0.390 | 1.124 | 0.842 | 0.325 | 0.438 | 1.166 | 0.861 | 1.580 | 0.321 |
| ebi-a-GCST90001432 | Unswitched memory B cell %lymphocyte | RC | B cell | 21 | 0.811 | 0.576 | 1.141 | 0.229 | 0.613 | 0.300 | 0.438 | 0.195 | 0.808 | 0.512 | 1.276 | 0.361 |
| ebi-a-GCST90001433 | IgD- CD27- B cell %lymphocyte | RC | B cell | 17 | 1.219 | 0.862 | 1.725 | 0.262 | 0.781 | 0.323 | 0.688 | 0.590 | 1.105 | 0.686 | 1.781 | 0.681 |
| ebi-a-GCST90001434 | Switched memory B cell %lymphocyte | RC | B cell | 18 | 1.191 | 0.895 | 1.586 | 0.230 | 1.081 | 0.685 | 0.493 | 0.743 | 1.066 | 0.709 | 1.601 | 0.759 |
| ebi-a-GCST90001435 | Plasma Blast-Plasma Cell %lymphocyte | RC | B cell | 18 | 1.000 | 0.875 | 1.143 | 0.996 | 1.025 | 0.878 | 0.158 | 0.759 | 1.017 | 0.860 | 1.204 | 0.840 |
| ebi-a-GCST90001436 | Memory B cell %lymphocyte | RC | B cell | 26 | 0.961 | 0.827 | 1.115 | 0.596 | 0.878 | 0.746 | 0.143 | 0.131 | 0.932 | 0.782 | 1.111 | 0.434 |
| ebi-a-GCST90001437 | Naive-mature B cell %lymphocyte | RC | B cell | 20 | 1.226 | 0.848 | 1.774 | 0.279 | 1.259 | 0.511 | 1.135 | 0.623 | 1.105 | 0.663 | 1.841 | 0.702 |
| ebi-a-GCST90001438 | IgD- CD38dim B cell AC | AC | B cell | 16 | 1.033 | 0.697 | 1.531 | 0.871 | 1.011 | 0.505 | 0.702 | 0.975 | 1.088 | 0.617 | 1.918 | 0.770 |
| ebi-a-GCST90001439 | IgD+ CD24+ B cell %lymphocyte | RC | B cell | 15 | 0.927 | 0.543 | 1.581 | 0.780 | 0.904 | 0.254 | 1.147 | 0.878 | 0.838 | 0.465 | 1.511 | 0.557 |
| ebi-a-GCST90001440 | IgD- CD24- B cell %lymphocyte | RC | B cell | 24 | 0.934 | 0.707 | 1.233 | 0.629 | 0.798 | 0.528 | 0.329 | 0.296 | 0.913 | 0.606 | 1.377 | 0.665 |
| ebi-a-GCST90001441 | IgD+ CD24- B cell %lymphocyte | RC | B cell | 21 | 1.052 | 0.730 | 1.518 | 0.785 | 1.138 | 0.503 | 0.927 | 0.760 | 1.108 | 0.680 | 1.804 | 0.681 |
| ebi-a-GCST90001442 | CD24+ CD27+ B cell %lymphocyte | RC | B cell | 22 | 0.996 | 0.870 | 1.139 | 0.948 | 0.984 | 0.842 | 0.154 | 0.840 | 0.981 | 0.823 | 1.171 | 0.835 |
| ebi-a-GCST90001443 | CD20- B cell %lymphocyte | RC | B cell | 16 | 1.032 | 0.847 | 1.258 | 0.755 | 1.029 | 0.807 | 0.250 | 0.819 | 1.032 | 0.817 | 1.302 | 0.793 |
| ebi-a-GCST90001444 | CD20- CD38- B cell %lymphocyte | RC | B cell | 23 | 0.907 | 0.700 | 1.175 | 0.459 | 0.861 | 0.589 | 0.328 | 0.451 | 0.932 | 0.637 | 1.364 | 0.718 |
| ebi-a-GCST90001445 | IgD- CD38- B cell %B cell | RC | B cell | 11 | 1.092 | 0.685 | 1.743 | 0.711 | 1.162 | 0.513 | 0.951 | 0.727 | 1.050 | 0.575 | 1.917 | 0.874 |
| ebi-a-GCST90001446 | IgD- CD38- B cell AC | AC | B cell | 14 | 1.020 | 0.768 | 1.354 | 0.891 | 0.946 | 0.657 | 0.346 | 0.772 | 0.958 | 0.651 | 1.411 | 0.829 |
| ebi-a-GCST90001447 | IgD+ CD38+ B cell %B cell | RC | B cell | 25 | 1.110 | 0.896 | 1.374 | 0.341 | 1.129 | 0.822 | 0.357 | 0.461 | 1.073 | 0.784 | 1.466 | 0.661 |
| ebi-a-GCST90001448 | CD11c+ monocyte AC | AC | cDC | 15 | 1.256 | 0.946 | 1.668 | 0.116 | 1.258 | 0.803 | 0.564 | 0.334 | 1.262 | 0.875 | 1.822 | 0.213 |
| ebi-a-GCST90001449 | CD11c+ monocyte %monocyte | RC | cDC | 20 | 1.335 | 1.010 | 1.763 | 0.042 | 1.570 | 0.957 | 0.778 | 0.091 | 1.297 | 0.840 | 2.002 | 0.241 |
| ebi-a-GCST90001450 | CD62L- monocyte AC | AC | cDC | 17 | 1.001 | 0.822 | 1.219 | 0.992 | 0.992 | 0.771 | 0.250 | 0.953 | 0.968 | 0.746 | 1.257 | 0.809 |
| ebi-a-GCST90001451 | CD62L- monocyte %monocyte | RC | cDC | 21 | 0.765 | 0.588 | 0.994 | 0.045 | 0.822 | 0.447 | 0.502 | 0.537 | 0.859 | 0.601 | 1.229 | 0.406 |
| ebi-a-GCST90001452 | CD11c+ CD62L- monocyte AC | AC | cDC | 22 | 1.090 | 0.876 | 1.356 | 0.438 | 1.361 | 1.025 | 0.385 | 0.046 | 1.124 | 0.853 | 1.482 | 0.407 |
| ebi-a-GCST90001453 | CD11c+ CD62L- monocyte %monocyte | RC | cDC | 17 | 0.992 | 0.668 | 1.473 | 0.968 | 1.014 | 0.450 | 0.825 | 0.973 | 0.899 | 0.518 | 1.561 | 0.706 |
| ebi-a-GCST90001454 | CD62L- HLA DR++ monocyte AC | AC | cDC | 19 | 0.880 | 0.597 | 1.296 | 0.517 | 0.845 | 0.328 | 0.798 | 0.731 | 0.983 | 0.580 | 1.667 | 0.950 |
| ebi-a-GCST90001455 | CD62L- HLA DR++ monocyte %monocyte | RC | cDC | 11 | 1.022 | 0.639 | 1.636 | 0.927 | 1.839 | 0.554 | 2.206 | 0.346 | 0.896 | 0.479 | 1.679 | 0.733 |
| ebi-a-GCST90001456 | CD11c+ HLA DR++ monocyte AC | AC | cDC | 17 | 1.082 | 0.772 | 1.515 | 0.647 | 1.189 | 0.694 | 0.639 | 0.538 | 0.998 | 0.641 | 1.554 | 0.993 |
| ebi-a-GCST90001457 | CD11c+ HLA DR++ monocyte %monocyte | RC | cDC | 16 | 1.054 | 0.846 | 1.314 | 0.637 | 0.946 | 0.728 | 0.248 | 0.682 | 0.959 | 0.731 | 1.258 | 0.762 |
| ebi-a-GCST90001458 | Myeloid Dendritic Cell AC | AC | cDC | 23 | 0.912 | 0.765 | 1.087 | 0.302 | 1.020 | 0.812 | 0.232 | 0.869 | 0.988 | 0.771 | 1.266 | 0.925 |
| ebi-a-GCST90001459 | Myeloid Dendritic Cell %Dendritic Cell | RC | cDC | 26 | 0.861 | 0.656 | 1.129 | 0.280 | 0.925 | 0.583 | 0.428 | 0.744 | 0.960 | 0.644 | 1.430 | 0.840 |
| ebi-a-GCST90001460 | Plasmacytoid Dendritic Cell AC | AC | cDC | 29 | 0.915 | 0.789 | 1.060 | 0.235 | 0.933 | 0.771 | 0.178 | 0.484 | 0.958 | 0.769 | 1.192 | 0.698 |
| ebi-a-GCST90001461 | Dendritic Cell AC | AC | cDC | 19 | 0.859 | 0.624 | 1.182 | 0.350 | 1.346 | 0.783 | 0.729 | 0.297 | 1.092 | 0.695 | 1.716 | 0.702 |
| ebi-a-GCST90001462 | CD62L- Dendritic Cell AC | AC | cDC | 18 | 1.065 | 0.915 | 1.239 | 0.415 | 1.217 | 1.037 | 0.195 | 0.029 | 1.089 | 0.905 | 1.310 | 0.366 |
| ebi-a-GCST90001463 | CD62L- Dendritic Cell %Dendritic Cell | RC | cDC | 20 | 0.986 | 0.810 | 1.200 | 0.885 | 0.969 | 0.737 | 0.265 | 0.827 | 0.986 | 0.753 | 1.289 | 0.916 |
| ebi-a-GCST90001464 | CD86+ myeloid Dendritic Cell AC | AC | cDC | 21 | 0.936 | 0.768 | 1.142 | 0.515 | 0.938 | 0.726 | 0.241 | 0.634 | 1.020 | 0.806 | 1.290 | 0.870 |
| ebi-a-GCST90001465 | CD86+ myeloid Dendritic Cell %Dendritic Cell | RC | cDC | 23 | 1.002 | 0.895 | 1.121 | 0.974 | 1.095 | 0.955 | 0.150 | 0.206 | 1.032 | 0.897 | 1.189 | 0.656 |
| ebi-a-GCST90001466 | CD86+ plasmacytoid Dendritic Cell AC | AC | cDC | 20 | 0.908 | 0.661 | 1.246 | 0.550 | 0.999 | 0.593 | 0.522 | 0.997 | 1.237 | 0.779 | 1.964 | 0.367 |
| ebi-a-GCST90001467 | CD86+ plasmacytoid Dendritic Cell %Dendritic Cell | RC | cDC | 26 | 0.992 | 0.745 | 1.322 | 0.957 | 0.902 | 0.542 | 0.459 | 0.694 | 1.157 | 0.749 | 1.789 | 0.510 |
| ebi-a-GCST90001468 | CD62L- myeloid Dendritic Cell AC | AC | cDC | 16 | 0.921 | 0.692 | 1.226 | 0.574 | 1.012 | 0.637 | 0.468 | 0.962 | 0.990 | 0.690 | 1.421 | 0.958 |
| ebi-a-GCST90001469 | CD62L- myeloid Dendritic Cell %Dendritic Cell | RC | cDC | 24 | 1.009 | 0.847 | 1.201 | 0.922 | 0.995 | 0.780 | 0.243 | 0.970 | 0.999 | 0.784 | 1.272 | 0.993 |
| ebi-a-GCST90001470 | CD62L- plasmacytoid Dendritic Cell AC | AC | cDC | 24 | 0.895 | 0.664 | 1.207 | 0.469 | 1.368 | 0.874 | 0.613 | 0.184 | 1.082 | 0.733 | 1.598 | 0.692 |
| ebi-a-GCST90001471 | CD62L- plasmacytoid Dendritic Cell %Dendritic Cell | RC | cDC | 17 | 0.903 | 0.719 | 1.134 | 0.378 | 0.899 | 0.654 | 0.287 | 0.525 | 0.825 | 0.589 | 1.156 | 0.264 |
| ebi-a-GCST90001472 | CD62L- CD86+ myeloid Dendritic Cell AC | AC | cDC | 19 | 1.024 | 0.830 | 1.263 | 0.824 | 0.966 | 0.726 | 0.276 | 0.816 | 1.046 | 0.801 | 1.365 | 0.741 |
| ebi-a-GCST90001473 | CD62L- CD86+ myeloid Dendritic Cell %Dendritic Cell | RC | cDC | 18 | 1.069 | 0.861 | 1.328 | 0.543 | 0.918 | 0.690 | 0.261 | 0.563 | 1.077 | 0.816 | 1.420 | 0.601 |
| ebi-a-GCST90001474 | Plasmacytoid Dendritic Cell %Dendritic Cell | RC | cDC | 24 | 1.142 | 0.927 | 1.407 | 0.211 | 1.231 | 0.904 | 0.380 | 0.200 | 1.058 | 0.790 | 1.419 | 0.704 |
| ebi-a-GCST90001475 | HLA DR++ monocyte %monocyte | RC | TBNK | 20 | 1.093 | 0.838 | 1.425 | 0.513 | 0.942 | 0.576 | 0.463 | 0.813 | 1.053 | 0.722 | 1.537 | 0.787 |
| ebi-a-GCST90001476 | HLA DR++ monocyte %leukocyte | RC | TBNK | 8 | 1.244 | 0.845 | 1.830 | 0.268 | 0.922 | 0.444 | 0.675 | 0.836 | 1.165 | 0.706 | 1.921 | 0.551 |
| ebi-a-GCST90001477 | HLA DR++ monocyte AC | AC | TBNK | 23 | 0.877 | 0.720 | 1.069 | 0.193 | 0.865 | 0.664 | 0.229 | 0.297 | 0.980 | 0.729 | 1.316 | 0.891 |
| ebi-a-GCST90001478 | CD4 Treg %CD4+ T cell | RC | Treg | 16 | 0.945 | 0.717 | 1.246 | 0.689 | 0.811 | 0.540 | 0.331 | 0.332 | 0.845 | 0.609 | 1.173 | 0.315 |
| ebi-a-GCST90001479 | CD4 Treg %T cell | RC | Treg | 16 | 1.034 | 0.767 | 1.394 | 0.827 | 1.482 | 0.955 | 0.651 | 0.101 | 1.149 | 0.745 | 1.774 | 0.529 |
| ebi-a-GCST90001480 | Resting CD4 Treg AC | AC | Treg | 25 | 0.984 | 0.779 | 1.244 | 0.895 | 0.961 | 0.656 | 0.367 | 0.840 | 1.022 | 0.718 | 1.454 | 0.904 |
| ebi-a-GCST90001481 | Resting CD4 Treg %CD4 Treg | RC | Treg | 29 | 0.988 | 0.878 | 1.112 | 0.842 | 0.950 | 0.818 | 0.142 | 0.509 | 0.945 | 0.801 | 1.115 | 0.504 |
| ebi-a-GCST90001482 | Resting CD4 Treg %CD4+ T cell | RC | Treg | 33 | 0.954 | 0.852 | 1.068 | 0.409 | 1.006 | 0.875 | 0.140 | 0.938 | 0.932 | 0.799 | 1.087 | 0.367 |
| ebi-a-GCST90001483 | CD39+ resting CD4 Treg AC | AC | Treg | 28 | 0.981 | 0.835 | 1.153 | 0.818 | 0.975 | 0.785 | 0.212 | 0.822 | 0.948 | 0.756 | 1.188 | 0.643 |
| ebi-a-GCST90001484 | CD39+ resting CD4 Treg %resting CD4 Treg | RC | Treg | 27 | 0.980 | 0.812 | 1.183 | 0.835 | 0.996 | 0.756 | 0.275 | 0.978 | 0.927 | 0.750 | 1.145 | 0.480 |
| ebi-a-GCST90001485 | CD39+ resting CD4 Treg %CD4 Treg | RC | Treg | 35 | 0.911 | 0.824 | 1.007 | 0.067 | 0.869 | 0.766 | 0.110 | 0.036 | 0.905 | 0.787 | 1.042 | 0.165 |
| ebi-a-GCST90001486 | Activated CD4 Treg AC | AC | Treg | 15 | 0.913 | 0.737 | 1.131 | 0.405 | 1.048 | 0.820 | 0.257 | 0.712 | 1.084 | 0.831 | 1.415 | 0.553 |
| ebi-a-GCST90001487 | Activated CD4 Treg %CD4 Treg | RC | Treg | 28 | 0.899 | 0.737 | 1.096 | 0.293 | 0.989 | 0.748 | 0.277 | 0.941 | 1.024 | 0.751 | 1.396 | 0.879 |
| ebi-a-GCST90001488 | Activated CD4 Treg %CD4+ T cell | RC | Treg | 18 | 0.991 | 0.738 | 1.330 | 0.951 | 1.103 | 0.715 | 0.479 | 0.664 | 1.171 | 0.800 | 1.715 | 0.416 |
| ebi-a-GCST90001489 | CD39+ activated CD4 Treg AC | AC | Treg | 29 | 1.040 | 0.877 | 1.234 | 0.650 | 1.012 | 0.767 | 0.281 | 0.935 | 0.960 | 0.778 | 1.184 | 0.703 |
| ebi-a-GCST90001490 | CD39+ activated CD4 Treg %activated CD4 Treg | RC | Treg | 8 | 0.667 | 0.438 | 1.016 | 0.059 | 0.490 | 0.247 | 0.335 | 0.087 | 0.958 | 0.524 | 1.754 | 0.891 |
| ebi-a-GCST90001491 | CD39+ activated CD4 Treg %CD4 Treg | RC | Treg | 22 | 0.998 | 0.869 | 1.146 | 0.976 | 1.062 | 0.872 | 0.209 | 0.558 | 1.010 | 0.853 | 1.197 | 0.906 |
| ebi-a-GCST90001492 | Secreting CD4 Treg AC | AC | Treg | 22 | 1.061 | 0.954 | 1.180 | 0.275 | 1.081 | 0.949 | 0.140 | 0.254 | 1.027 | 0.905 | 1.167 | 0.678 |
| ebi-a-GCST90001493 | Secreting CD4 Treg %CD4 Treg | RC | Treg | 29 | 1.157 | 0.994 | 1.347 | 0.059 | 1.213 | 1.000 | 0.234 | 0.061 | 1.178 | 0.970 | 1.432 | 0.099 |
| ebi-a-GCST90001494 | Secreting CD4 Treg %CD4+ T cell | RC | Treg | 24 | 1.079 | 0.903 | 1.288 | 0.403 | 1.126 | 0.910 | 0.240 | 0.286 | 1.215 | 1.001 | 1.476 | 0.049 |
| ebi-a-GCST90001495 | CD39+ secreting CD4 Treg AC | AC | Treg | 26 | 1.054 | 0.885 | 1.254 | 0.557 | 0.852 | 0.653 | 0.227 | 0.252 | 0.954 | 0.780 | 1.166 | 0.644 |
| ebi-a-GCST90001496 | CD39+ secreting CD4 Treg %secreting CD4 Treg | RC | Treg | 26 | 1.027 | 0.868 | 1.216 | 0.756 | 1.011 | 0.804 | 0.232 | 0.924 | 1.028 | 0.840 | 1.259 | 0.789 |
| ebi-a-GCST90001497 | CD39+ secreting CD4 Treg %CD4 Treg | RC | Treg | 21 | 1.087 | 0.928 | 1.274 | 0.302 | 0.981 | 0.801 | 0.199 | 0.854 | 1.036 | 0.842 | 1.276 | 0.737 |
| ebi-a-GCST90001498 | Activated & resting CD4 Treg AC | AC | Treg | 19 | 1.079 | 0.753 | 1.545 | 0.680 | 1.754 | 0.813 | 1.349 | 0.170 | 1.072 | 0.645 | 1.782 | 0.788 |
| ebi-a-GCST90001499 | Activated & resting CD4 Treg %CD4 Treg | RC | Treg | 26 | 0.855 | 0.731 | 1.000 | 0.050 | 0.827 | 0.676 | 0.166 | 0.076 | 0.850 | 0.704 | 1.027 | 0.092 |
| ebi-a-GCST90001500 | Activated & resting CD4 Treg %CD4+ T cell | RC | Treg | 26 | 1.082 | 0.874 | 1.338 | 0.469 | 1.023 | 0.760 | 0.304 | 0.880 | 1.001 | 0.748 | 1.339 | 0.996 |
| ebi-a-GCST90001501 | Activated & secreting CD4 Treg AC | AC | Treg | 21 | 1.045 | 0.945 | 1.157 | 0.390 | 1.081 | 0.954 | 0.135 | 0.238 | 1.021 | 0.903 | 1.155 | 0.737 |
| ebi-a-GCST90001502 | Activated & secreting CD4 Treg %CD4 Treg | RC | Treg | 36 | 1.067 | 0.985 | 1.156 | 0.111 | 1.097 | 0.997 | 0.104 | 0.065 | 1.060 | 0.962 | 1.170 | 0.240 |
| ebi-a-GCST90001503 | Activated & secreting CD4 Treg %CD4+ T cell | RC | Treg | 29 | 0.974 | 0.882 | 1.076 | 0.601 | 0.979 | 0.870 | 0.116 | 0.727 | 1.022 | 0.894 | 1.168 | 0.748 |
| ebi-a-GCST90001504 | CD25++ CD4+ T cell AC | AC | Treg | 23 | 0.969 | 0.800 | 1.174 | 0.748 | 0.998 | 0.765 | 0.266 | 0.989 | 0.939 | 0.715 | 1.232 | 0.648 |
| ebi-a-GCST90001505 | CD25++ CD4+ T cell %CD4+ T cell | RC | Treg | 25 | 1.013 | 0.796 | 1.290 | 0.913 | 1.086 | 0.762 | 0.384 | 0.653 | 1.234 | 0.861 | 1.769 | 0.252 |
| ebi-a-GCST90001506 | CD25++ CD4+ T cell %T cell | RC | Treg | 17 | 1.071 | 0.806 | 1.423 | 0.635 | 1.095 | 0.734 | 0.438 | 0.662 | 1.288 | 0.863 | 1.923 | 0.216 |
| ebi-a-GCST90001507 | CD25++ CD45RA+ CD4 not Treg AC | AC | Treg | 25 | 0.982 | 0.815 | 1.185 | 0.852 | 0.941 | 0.727 | 0.242 | 0.645 | 1.008 | 0.771 | 1.318 | 0.955 |
| ebi-a-GCST90001508 | CD25++ CD45RA+ CD4 not Treg %CD4+ T cell | RC | Treg | 31 | 0.949 | 0.840 | 1.073 | 0.406 | 0.881 | 0.759 | 0.132 | 0.108 | 0.947 | 0.797 | 1.126 | 0.538 |
| ebi-a-GCST90001509 | CD25++ CD45RA+ CD4 not Treg %T cell | RC | Treg | 26 | 0.941 | 0.833 | 1.063 | 0.330 | 0.913 | 0.786 | 0.138 | 0.250 | 0.983 | 0.830 | 1.164 | 0.842 |
| ebi-a-GCST90001510 | CD25++ CD45RA- CD4 not Treg AC | AC | Treg | 19 | 0.968 | 0.828 | 1.132 | 0.688 | 0.921 | 0.723 | 0.223 | 0.516 | 0.920 | 0.766 | 1.104 | 0.370 |
| ebi-a-GCST90001511 | CD25++ CD45RA- CD4 not Treg %CD4+ T cell | RC | Treg | 24 | 0.925 | 0.794 | 1.079 | 0.322 | 0.861 | 0.714 | 0.161 | 0.130 | 0.846 | 0.692 | 1.036 | 0.105 |
| ebi-a-GCST90001512 | CD25++ CD45RA- CD4 not Treg %T cell | RC | Treg | 28 | 1.016 | 0.881 | 1.171 | 0.828 | 0.899 | 0.760 | 0.151 | 0.225 | 0.851 | 0.699 | 1.036 | 0.108 |
| ebi-a-GCST90001513 | CD4 Treg AC | AC | Treg | 21 | 0.888 | 0.651 | 1.210 | 0.451 | 0.987 | 0.597 | 0.495 | 0.959 | 0.865 | 0.570 | 1.313 | 0.496 |
| ebi-a-GCST90001514 | Hematopoietic Stem Cell AC | AC | Myeloid cell | 19 | 0.980 | 0.792 | 1.213 | 0.853 | 0.964 | 0.701 | 0.308 | 0.827 | 1.147 | 0.858 | 1.533 | 0.355 |
| ebi-a-GCST90001515 | Immature Myeloid-Derived Suppressor Cells AC | AC | Myeloid cell | 21 | 1.006 | 0.806 | 1.256 | 0.958 | 1.111 | 0.732 | 0.464 | 0.626 | 0.981 | 0.732 | 1.316 | 0.899 |
| ebi-a-GCST90001516 | Immature Myeloid-Derived Suppressor Cells %CD33dim HLA DR- CD66b- | RC | Myeloid cell | 17 | 0.863 | 0.708 | 1.051 | 0.143 | 0.945 | 0.712 | 0.268 | 0.702 | 0.888 | 0.677 | 1.163 | 0.387 |
| ebi-a-GCST90001517 | CD33+ HLA DR+ AC | AC | Myeloid cell | 28 | 0.880 | 0.790 | 0.981 | 0.021 | 0.901 | 0.792 | 0.117 | 0.130 | 0.898 | 0.780 | 1.034 | 0.135 |
| ebi-a-GCST90001518 | CD33+ HLA DR+ CD14- AC | AC | Myeloid cell | 29 | 0.899 | 0.824 | 0.981 | 0.017 | 0.911 | 0.822 | 0.094 | 0.088 | 0.916 | 0.815 | 1.029 | 0.140 |
| ebi-a-GCST90001519 | CD33+ HLA DR+ CD14- %CD33+ HLA DR+ | RC | Myeloid cell | 18 | 0.994 | 0.823 | 1.200 | 0.949 | 1.027 | 0.782 | 0.280 | 0.852 | 0.978 | 0.756 | 1.265 | 0.867 |
| ebi-a-GCST90001520 | CD33+ HLA DR+ CD14dim AC | AC | Myeloid cell | 28 | 0.937 | 0.822 | 1.068 | 0.330 | 0.915 | 0.776 | 0.150 | 0.299 | 0.872 | 0.728 | 1.046 | 0.140 |
| ebi-a-GCST90001521 | CD33+ HLA DR+ CD14dim %CD33+ HLA DR+ | RC | Myeloid cell | 24 | 0.977 | 0.789 | 1.210 | 0.831 | 0.864 | 0.610 | 0.300 | 0.418 | 0.902 | 0.662 | 1.230 | 0.516 |
| ebi-a-GCST90001522 | CD33- HLA DR- AC | AC | Myeloid cell | 21 | 0.950 | 0.754 | 1.198 | 0.666 | 0.840 | 0.519 | 0.405 | 0.487 | 0.939 | 0.690 | 1.278 | 0.691 |
| ebi-a-GCST90001523 | CD33- HLA DR+ AC | AC | Myeloid cell | 34 | 1.023 | 0.881 | 1.187 | 0.768 | 1.032 | 0.847 | 0.204 | 0.754 | 0.958 | 0.779 | 1.179 | 0.686 |
| ebi-a-GCST90001524 | Granulocytic Myeloid-Derived Suppressor Cells AC | AC | Myeloid cell | 21 | 0.895 | 0.692 | 1.157 | 0.396 | 0.907 | 0.538 | 0.474 | 0.718 | 0.841 | 0.584 | 1.213 | 0.355 |
| ebi-a-GCST90001525 | CD33dim HLA DR+ CD11b+ AC | AC | Myeloid cell | 26 | 1.004 | 0.831 | 1.214 | 0.965 | 0.984 | 0.722 | 0.304 | 0.918 | 0.975 | 0.743 | 1.278 | 0.854 |
| ebi-a-GCST90001526 | CD33dim HLA DR+ CD11b+ %CD33dim HLA DR+ | RC | Myeloid cell | 23 | 1.039 | 0.910 | 1.186 | 0.573 | 0.973 | 0.800 | 0.190 | 0.786 | 1.027 | 0.847 | 1.245 | 0.788 |
| ebi-a-GCST90001527 | CD33dim HLA DR+ CD11b- AC | AC | Myeloid cell | 27 | 1.027 | 0.877 | 1.203 | 0.740 | 1.038 | 0.850 | 0.208 | 0.717 | 0.947 | 0.764 | 1.175 | 0.622 |
| ebi-a-GCST90001528 | CD33dim HLA DR+ CD11b- %CD33dim HLA DR+ | RC | Myeloid cell | 23 | 0.927 | 0.830 | 1.035 | 0.180 | 0.974 | 0.832 | 0.154 | 0.751 | 0.956 | 0.815 | 1.121 | 0.577 |
| ebi-a-GCST90001529 | CD66b++ myeloid cell AC | AC | Myeloid cell | 16 | 0.920 | 0.684 | 1.239 | 0.585 | 0.919 | 0.540 | 0.488 | 0.761 | 0.992 | 0.671 | 1.466 | 0.969 |
| ebi-a-GCST90001530 | Monocytic Myeloid-Derived Suppressor Cells AC | AC | Myeloid cell | 17 | 0.906 | 0.735 | 1.115 | 0.351 | 0.847 | 0.577 | 0.325 | 0.408 | 0.892 | 0.674 | 1.180 | 0.423 |
| ebi-a-GCST90001531 | CD33dim HLA DR- AC | AC | Myeloid cell | 24 | 1.031 | 0.933 | 1.140 | 0.547 | 1.043 | 0.917 | 0.134 | 0.528 | 1.063 | 0.915 | 1.234 | 0.424 |
| ebi-a-GCST90001532 | Basophil AC | AC | Myeloid cell | 23 | 1.027 | 0.917 | 1.150 | 0.648 | 1.098 | 0.963 | 0.144 | 0.175 | 1.070 | 0.919 | 1.245 | 0.385 |
| ebi-a-GCST90001533 | Basophil %CD33dim HLA DR- CD66b- | RC | Myeloid cell | 19 | 1.036 | 0.809 | 1.327 | 0.780 | 0.774 | 0.478 | 0.373 | 0.313 | 0.954 | 0.689 | 1.320 | 0.775 |
| ebi-a-GCST90001534 | CD45RA- CD4+ T cell AC | AC | Maturation stages of T cell | 14 | 1.115 | 0.965 | 1.288 | 0.141 | 1.116 | 0.945 | 0.186 | 0.222 | 1.100 | 0.918 | 1.318 | 0.301 |
| ebi-a-GCST90001535 | CD45RA- CD4+ T cell %CD4+ T cell | RC | Maturation stages of T cell | 29 | 1.071 | 0.857 | 1.338 | 0.546 | 1.329 | 0.957 | 0.436 | 0.101 | 1.321 | 0.938 | 1.861 | 0.111 |
| ebi-a-GCST90001536 | CD45RA- CD4+ T cell %T cell | RC | Maturation stages of T cell | 25 | 1.068 | 0.982 | 1.162 | 0.124 | 1.075 | 0.976 | 0.104 | 0.154 | 1.086 | 0.967 | 1.220 | 0.163 |
| ebi-a-GCST90001537 | Central Memory CD4+ T cell AC | AC | Maturation stages of T cell | 25 | 1.146 | 0.895 | 1.466 | 0.279 | 1.246 | 0.881 | 0.433 | 0.227 | 1.231 | 0.869 | 1.746 | 0.242 |
| ebi-a-GCST90001538 | Central Memory CD4+ T cell %CD4+ T cell | RC | Maturation stages of T cell | 31 | 0.976 | 0.896 | 1.064 | 0.582 | 0.957 | 0.871 | 0.090 | 0.374 | 0.957 | 0.867 | 1.056 | 0.384 |
| ebi-a-GCST90001539 | Central Memory CD4+ T cell %T cell | RC | Maturation stages of T cell | 23 | 1.151 | 0.885 | 1.498 | 0.293 | 1.029 | 0.677 | 0.431 | 0.895 | 1.133 | 0.759 | 1.690 | 0.541 |
| ebi-a-GCST90001540 | Naive CD4+ T cell AC | AC | Maturation stages of T cell | 24 | 0.985 | 0.717 | 1.353 | 0.924 | 0.626 | 0.336 | 0.389 | 0.154 | 1.010 | 0.646 | 1.578 | 0.966 |
| ebi-a-GCST90001541 | Naive CD4+ T cell %CD4+ T cell | RC | Maturation stages of T cell | 35 | 0.920 | 0.734 | 1.154 | 0.470 | 0.838 | 0.581 | 0.307 | 0.352 | 0.715 | 0.513 | 0.997 | 0.048 |
| ebi-a-GCST90001542 | Effector Memory CD4+ T cell AC | AC | Maturation stages of T cell | 22 | 1.109 | 0.966 | 1.272 | 0.141 | 1.130 | 0.946 | 0.200 | 0.193 | 1.087 | 0.918 | 1.286 | 0.334 |
| ebi-a-GCST90001543 | Effector Memory CD4+ T cell %CD4+ T cell | RC | Maturation stages of T cell | 27 | 1.235 | 0.977 | 1.559 | 0.077 | 1.194 | 0.868 | 0.380 | 0.286 | 1.117 | 0.831 | 1.500 | 0.463 |
| ebi-a-GCST90001544 | Effector Memory CD4+ T cell %T cell | RC | Maturation stages of T cell | 20 | 1.263 | 0.993 | 1.607 | 0.057 | 1.363 | 0.936 | 0.512 | 0.124 | 1.268 | 0.910 | 1.768 | 0.160 |
| ebi-a-GCST90001545 | Terminally Differentiated CD4+ T cell AC | AC | Maturation stages of T cell | 11 | 0.883 | 0.603 | 1.294 | 0.524 | 1.031 | 0.512 | 0.723 | 0.933 | 1.054 | 0.634 | 1.752 | 0.840 |
| ebi-a-GCST90001546 | Terminally Differentiated CD4+ T cell %CD4+ T cell | RC | Maturation stages of T cell | 20 | 0.965 | 0.673 | 1.385 | 0.847 | 0.620 | 0.290 | 0.472 | 0.234 | 0.988 | 0.586 | 1.665 | 0.963 |
| ebi-a-GCST90001547 | Terminally Differentiated CD4+ T cell %T cell | RC | Maturation stages of T cell | 25 | 0.992 | 0.839 | 1.174 | 0.929 | 0.960 | 0.784 | 0.195 | 0.698 | 1.014 | 0.813 | 1.265 | 0.902 |
| ebi-a-GCST90001548 | Central Memory CD8+ T cell AC | AC | Maturation stages of T cell | 24 | 1.135 | 0.808 | 1.594 | 0.465 | 0.911 | 0.509 | 0.529 | 0.756 | 1.057 | 0.634 | 1.760 | 0.832 |
| ebi-a-GCST90001549 | Central Memory CD8+ T cell %CD8+ T cell | RC | Maturation stages of T cell | 29 | 1.124 | 0.827 | 1.527 | 0.456 | 0.953 | 0.502 | 0.610 | 0.884 | 0.937 | 0.586 | 1.497 | 0.785 |
| ebi-a-GCST90001550 | Central Memory CD8+ T cell %T cell | RC | Maturation stages of T cell | 20 | 1.319 | 0.917 | 1.895 | 0.135 | 1.205 | 0.602 | 0.836 | 0.606 | 1.165 | 0.710 | 1.914 | 0.545 |
| ebi-a-GCST90001551 | Naive CD8+ T cell AC | AC | Maturation stages of T cell | 27 | 1.007 | 0.813 | 1.245 | 0.952 | 0.966 | 0.757 | 0.236 | 0.785 | 1.018 | 0.789 | 1.313 | 0.893 |
| ebi-a-GCST90001552 | Naive CD8+ T cell %CD8+ T cell | RC | Maturation stages of T cell | 35 | 0.983 | 0.878 | 1.100 | 0.761 | 0.953 | 0.838 | 0.123 | 0.469 | 0.977 | 0.852 | 1.120 | 0.736 |
| ebi-a-GCST90001553 | Naive CD8+ T cell %T cell | RC | Maturation stages of T cell | 27 | 0.996 | 0.817 | 1.214 | 0.965 | 1.021 | 0.811 | 0.235 | 0.863 | 1.016 | 0.808 | 1.277 | 0.893 |
| ebi-a-GCST90001554 | Effector Memory CD8+ T cell AC | AC | Maturation stages of T cell | 24 | 1.056 | 0.899 | 1.240 | 0.510 | 1.049 | 0.862 | 0.205 | 0.640 | 1.067 | 0.883 | 1.290 | 0.502 |
| ebi-a-GCST90001555 | Effector Memory CD8+ T cell %CD8+ T cell | RC | Maturation stages of T cell | 22 | 1.016 | 0.904 | 1.142 | 0.792 | 1.078 | 0.942 | 0.145 | 0.288 | 1.065 | 0.911 | 1.245 | 0.427 |
| ebi-a-GCST90001556 | Effector Memory CD8+ T cell %T cell | RC | Maturation stages of T cell | 14 | 1.021 | 0.839 | 1.243 | 0.834 | 1.024 | 0.803 | 0.250 | 0.851 | 0.971 | 0.750 | 1.257 | 0.823 |
| ebi-a-GCST90001557 | Terminally Differentiated CD8+ T cell AC | AC | Maturation stages of T cell | 17 | 1.206 | 0.863 | 1.686 | 0.272 | 1.384 | 0.769 | 0.814 | 0.296 | 1.276 | 0.824 | 1.976 | 0.275 |
| ebi-a-GCST90001558 | Terminally Differentiated CD8+ T cell %CD8+ T cell | RC | Maturation stages of T cell | 23 | 0.918 | 0.731 | 1.153 | 0.463 | 0.846 | 0.592 | 0.302 | 0.370 | 0.730 | 0.521 | 1.022 | 0.067 |
| ebi-a-GCST90001559 | Terminally Differentiated CD8+ T cell %T cell | RC | Maturation stages of T cell | 17 | 1.041 | 0.798 | 1.358 | 0.766 | 1.075 | 0.718 | 0.434 | 0.730 | 1.111 | 0.769 | 1.607 | 0.574 |
| ebi-a-GCST90001560 | CD45RA+ CD8+ T cell AC | AC | Maturation stages of T cell | 26 | 0.975 | 0.900 | 1.056 | 0.532 | 0.968 | 0.886 | 0.085 | 0.479 | 0.950 | 0.859 | 1.050 | 0.315 |
| ebi-a-GCST90001561 | CD45RA+ CD8+ T cell %CD8+ T cell | RC | Maturation stages of T cell | 24 | 0.955 | 0.849 | 1.075 | 0.448 | 0.913 | 0.796 | 0.125 | 0.205 | 0.940 | 0.802 | 1.100 | 0.440 |
| ebi-a-GCST90001562 | CD45RA+ CD8+ T cell %T cell | RC | Maturation stages of T cell | 32 | 0.991 | 0.911 | 1.079 | 0.838 | 0.931 | 0.846 | 0.089 | 0.149 | 0.949 | 0.851 | 1.059 | 0.349 |
| ebi-a-GCST90001563 | Central Memory CD4-CD8- T cell AC | AC | Maturation stages of T cell | 4 | 0.958 | 0.737 | 1.245 | 0.747 | 0.964 | 0.644 | 0.389 | 0.873 | 0.960 | 0.716 | 1.287 | 0.783 |
| ebi-a-GCST90001564 | Central Memory CD4-CD8- T cell %CD4-CD8- T cell | RC | Maturation stages of T cell | 16 | 0.858 | 0.627 | 1.175 | 0.340 | 0.922 | 0.587 | 0.416 | 0.728 | 0.906 | 0.607 | 1.352 | 0.630 |
| ebi-a-GCST90001565 | Central Memory CD4-CD8- T cell %T cell | RC | Maturation stages of T cell | 16 | 1.174 | 0.826 | 1.668 | 0.371 | 1.110 | 0.700 | 0.512 | 0.663 | 1.256 | 0.828 | 1.907 | 0.283 |
| ebi-a-GCST90001566 | Naive CD4-CD8- T cell AC | AC | Maturation stages of T cell | 18 | 1.110 | 0.759 | 1.621 | 0.591 | 1.359 | 0.730 | 0.846 | 0.348 | 1.074 | 0.650 | 1.774 | 0.780 |
| ebi-a-GCST90001567 | Naive CD4-CD8- T cell %CD4-CD8- T cell | RC | Maturation stages of T cell | 22 | 0.764 | 0.566 | 1.032 | 0.079 | 0.782 | 0.514 | 0.328 | 0.265 | 0.733 | 0.464 | 1.159 | 0.184 |
| ebi-a-GCST90001568 | Naive CD4-CD8- T cell %T cell | RC | Maturation stages of T cell | 20 | 1.001 | 0.727 | 1.380 | 0.994 | 1.115 | 0.687 | 0.541 | 0.665 | 1.048 | 0.634 | 1.732 | 0.856 |
| ebi-a-GCST90001569 | Effector Memory CD4-CD8- T cell AC | AC | Maturation stages of T cell | 19 | 1.246 | 0.866 | 1.792 | 0.236 | 1.096 | 0.569 | 0.720 | 0.787 | 1.224 | 0.721 | 2.080 | 0.454 |
| ebi-a-GCST90001570 | Effector Memory CD4-CD8- T cell %CD4-CD8- T cell | RC | Maturation stages of T cell | 25 | 0.995 | 0.807 | 1.226 | 0.960 | 1.025 | 0.760 | 0.307 | 0.873 | 1.102 | 0.813 | 1.493 | 0.533 |
| ebi-a-GCST90001571 | Effector Memory CD4-CD8- T cell %T cell | RC | Maturation stages of T cell | 23 | 1.073 | 0.808 | 1.425 | 0.625 | 0.998 | 0.617 | 0.481 | 0.994 | 0.926 | 0.621 | 1.381 | 0.705 |
| ebi-a-GCST90001572 | Terminally Differentiated CD4-CD8- T cell AC | AC | Maturation stages of T cell | 20 | 1.053 | 0.782 | 1.417 | 0.734 | 1.063 | 0.667 | 0.497 | 0.800 | 1.333 | 0.878 | 2.023 | 0.177 |
| ebi-a-GCST90001573 | Terminally Differentiated CD4-CD8- T cell %CD4-CD8- T cell | RC | Maturation stages of T cell | 24 | 1.102 | 0.867 | 1.401 | 0.427 | 0.921 | 0.641 | 0.333 | 0.659 | 1.033 | 0.725 | 1.472 | 0.857 |
| ebi-a-GCST90001574 | Terminally Differentiated CD4-CD8- T cell %T cell | RC | Maturation stages of T cell | 22 | 0.958 | 0.751 | 1.222 | 0.729 | 1.016 | 0.701 | 0.377 | 0.935 | 1.272 | 0.910 | 1.779 | 0.160 |
| ebi-a-GCST90001575 | Naive CD4+ T cell %T cell | RC | Maturation stages of T cell | 34 | 0.949 | 0.772 | 1.165 | 0.615 | 0.923 | 0.693 | 0.265 | 0.591 | 0.934 | 0.683 | 1.277 | 0.669 |
| ebi-a-GCST90001576 | Transitional B cell %B cell | RC | B cell | 15 | 1.224 | 0.747 | 2.004 | 0.423 | 1.125 | 0.415 | 1.121 | 0.821 | 1.017 | 0.563 | 1.838 | 0.955 |
| ebi-a-GCST90001577 | Transitional B cell AC | AC | B cell | 31 | 1.255 | 0.932 | 1.691 | 0.135 | 1.024 | 0.647 | 0.471 | 0.920 | 0.936 | 0.608 | 1.441 | 0.765 |
| ebi-a-GCST90001578 | Transitional B cell %lymphocyte | RC | B cell | 25 | 1.310 | 0.946 | 1.814 | 0.104 | 1.024 | 0.530 | 0.675 | 0.944 | 0.957 | 0.603 | 1.519 | 0.851 |
| ebi-a-GCST90001579 | CD14- CD16+ monocyte AC | AC | Monocyte | 17 | 1.072 | 0.871 | 1.319 | 0.513 | 1.191 | 0.921 | 0.306 | 0.203 | 1.165 | 0.868 | 1.563 | 0.309 |
| ebi-a-GCST90001580 | CD14+ CD16+ monocyte AC | AC | Monocyte | 19 | 1.004 | 0.744 | 1.355 | 0.979 | 0.987 | 0.622 | 0.455 | 0.957 | 1.079 | 0.748 | 1.555 | 0.685 |
| ebi-a-GCST90001581 | CD14- CD16- AC | AC | Monocyte | 23 | 0.957 | 0.836 | 1.096 | 0.525 | 0.941 | 0.807 | 0.144 | 0.443 | 0.956 | 0.799 | 1.142 | 0.618 |
| ebi-a-GCST90001582 | CD14+ CD16- monocyte AC | AC | Monocyte | 26 | 0.997 | 0.816 | 1.217 | 0.973 | 1.049 | 0.826 | 0.250 | 0.699 | 1.009 | 0.834 | 1.220 | 0.930 |
| ebi-a-GCST90001583 | Monocyte AC | AC | Monocyte | 26 | 1.030 | 0.897 | 1.184 | 0.673 | 1.036 | 0.880 | 0.168 | 0.677 | 1.039 | 0.861 | 1.253 | 0.691 |
| ebi-a-GCST90001584 | CD14- CD16+ monocyte %monocyte | RC | Monocyte | 22 | 1.182 | 0.851 | 1.643 | 0.319 | 1.568 | 0.990 | 0.722 | 0.070 | 1.305 | 0.870 | 1.958 | 0.198 |
| ebi-a-GCST90001585 | CD14+ CD16+ monocyte %monocyte | RC | Monocyte | 23 | 0.967 | 0.736 | 1.272 | 0.812 | 1.403 | 0.865 | 0.678 | 0.184 | 1.008 | 0.686 | 1.481 | 0.966 |
| ebi-a-GCST90001586 | CD14+ CD16- monocyte %monocyte | RC | Monocyte | 24 | 0.917 | 0.798 | 1.054 | 0.221 | 0.860 | 0.741 | 0.128 | 0.060 | 0.902 | 0.767 | 1.061 | 0.215 |
| ebi-a-GCST90001587 | CD16+ monocyte %monocyte | RC | Monocyte | 22 | 0.983 | 0.682 | 1.418 | 0.929 | 1.430 | 0.762 | 0.901 | 0.279 | 1.214 | 0.720 | 2.046 | 0.467 |
| ebi-a-GCST90001588 | T/B cell | RC | TBNK | 26 | 0.912 | 0.692 | 1.203 | 0.516 | 1.051 | 0.627 | 0.543 | 0.852 | 0.903 | 0.607 | 1.344 | 0.615 |
| ebi-a-GCST90001589 | CD4+/CD8+ T cell | RC | TBNK | 13 | 1.202 | 0.794 | 1.822 | 0.385 | 1.280 | 0.563 | 1.052 | 0.567 | 1.211 | 0.695 | 2.111 | 0.499 |
| ebi-a-GCST90001590 | CD4+ T cell AC | AC | TBNK | 23 | 1.062 | 0.857 | 1.315 | 0.583 | 1.057 | 0.798 | 0.298 | 0.704 | 1.022 | 0.748 | 1.398 | 0.890 |
| ebi-a-GCST90001591 | CD4+ T cell %T cell | RC | TBNK | 22 | 1.247 | 0.897 | 1.733 | 0.188 | 1.381 | 0.803 | 0.749 | 0.256 | 1.178 | 0.738 | 1.880 | 0.493 |
| ebi-a-GCST90001592 | CD8+ T cell AC | AC | TBNK | 21 | 0.946 | 0.826 | 1.084 | 0.427 | 0.968 | 0.826 | 0.153 | 0.686 | 0.950 | 0.800 | 1.127 | 0.553 |
| ebi-a-GCST90001593 | CD8+ T cell %T cell | RC | TBNK | 21 | 0.822 | 0.638 | 1.059 | 0.129 | 0.625 | 0.418 | 0.251 | 0.033 | 0.742 | 0.495 | 1.112 | 0.148 |
| ebi-a-GCST90001594 | CD4+CD8+ T cell AC | AC | TBNK | 18 | 1.017 | 0.723 | 1.431 | 0.922 | 1.517 | 0.804 | 0.963 | 0.217 | 1.187 | 0.742 | 1.899 | 0.475 |
| ebi-a-GCST90001595 | CD4+CD8+ T cell %T cell | RC | TBNK | 8 | 0.807 | 0.420 | 1.550 | 0.519 | 0.434 | 0.058 | 0.877 | 0.449 | 0.723 | 0.318 | 1.640 | 0.437 |
| ebi-a-GCST90001596 | CD8dim T cell AC | AC | TBNK | 26 | 0.911 | 0.756 | 1.098 | 0.328 | 0.844 | 0.655 | 0.214 | 0.202 | 0.887 | 0.671 | 1.171 | 0.396 |
| ebi-a-GCST90001597 | CD8dim T cell %T cell | RC | TBNK | 19 | 0.972 | 0.713 | 1.326 | 0.859 | 0.808 | 0.438 | 0.494 | 0.503 | 0.765 | 0.490 | 1.195 | 0.240 |
| ebi-a-GCST90001598 | CD4-CD8- T cell AC | AC | TBNK | 20 | 0.800 | 0.556 | 1.153 | 0.231 | 0.500 | 0.229 | 0.390 | 0.099 | 0.693 | 0.420 | 1.144 | 0.152 |
| ebi-a-GCST90001599 | CD4-CD8- T cell %T cell | RC | TBNK | 14 | 1.059 | 0.686 | 1.635 | 0.795 | 0.878 | 0.295 | 0.959 | 0.820 | 0.840 | 0.469 | 1.505 | 0.559 |
| ebi-a-GCST90001600 | Leukocyte AC | AC | TBNK | 11 | 1.026 | 0.837 | 1.258 | 0.803 | 1.085 | 0.788 | 0.348 | 0.629 | 1.055 | 0.820 | 1.358 | 0.676 |
| ebi-a-GCST90001601 | Lymphocyte AC | AC | TBNK | 19 | 1.163 | 0.823 | 1.643 | 0.393 | 1.092 | 0.638 | 0.587 | 0.751 | 1.207 | 0.785 | 1.855 | 0.391 |
| ebi-a-GCST90001602 | Lymphocyte %leukocyte | RC | TBNK | 22 | 1.083 | 0.883 | 1.329 | 0.444 | 1.159 | 0.898 | 0.295 | 0.271 | 1.118 | 0.839 | 1.488 | 0.446 |
| ebi-a-GCST90001603 | T cell AC | AC | TBNK | 15 | 1.059 | 0.736 | 1.525 | 0.757 | 1.041 | 0.555 | 0.656 | 0.902 | 1.002 | 0.653 | 1.536 | 0.994 |
| ebi-a-GCST90001604 | T cell %lymphocyte | RC | TBNK | 17 | 1.044 | 0.725 | 1.505 | 0.815 | 1.049 | 0.342 | 1.176 | 0.934 | 0.868 | 0.531 | 1.420 | 0.573 |
| ebi-a-GCST90001605 | T cell %leukocyte | RC | TBNK | 17 | 1.162 | 0.928 | 1.455 | 0.190 | 1.114 | 0.841 | 0.313 | 0.463 | 1.121 | 0.836 | 1.504 | 0.444 |
| ebi-a-GCST90001606 | CD4+ T cell %leukocyte | RC | TBNK | 13 | 1.307 | 0.784 | 2.180 | 0.305 | 2.273 | 0.682 | 2.735 | 0.208 | 1.712 | 0.838 | 3.499 | 0.140 |
| ebi-a-GCST90001607 | CD8+ T cell %leukocyte | RC | TBNK | 15 | 0.819 | 0.554 | 1.212 | 0.318 | 1.290 | 0.442 | 1.383 | 0.649 | 1.166 | 0.670 | 2.029 | 0.588 |
| ebi-a-GCST90001608 | CD4+CD8+ T cell %leukocyte | RC | TBNK | 21 | 1.097 | 0.781 | 1.541 | 0.592 | 1.681 | 0.793 | 1.264 | 0.191 | 1.190 | 0.747 | 1.895 | 0.463 |
| ebi-a-GCST90001609 | CD4+ CD8dim T cell AC | AC | TBNK | 14 | 0.843 | 0.630 | 1.129 | 0.253 | 0.713 | 0.451 | 0.327 | 0.174 | 0.824 | 0.535 | 1.270 | 0.381 |
| ebi-a-GCST90001610 | CD4+ CD8dim T cell %lymphocyte | RC | TBNK | 18 | 1.012 | 0.722 | 1.419 | 0.945 | 0.656 | 0.347 | 0.417 | 0.212 | 0.912 | 0.582 | 1.428 | 0.686 |
| ebi-a-GCST90001611 | CD4+ CD8dim T cell %leukocyte | RC | TBNK | 13 | 1.163 | 0.768 | 1.761 | 0.476 | 0.730 | 0.289 | 0.674 | 0.518 | 1.128 | 0.636 | 2.001 | 0.681 |
| ebi-a-GCST90001612 | CD8dim T cell %leukocyte | RC | TBNK | 18 | 1.082 | 0.834 | 1.403 | 0.555 | 1.096 | 0.753 | 0.412 | 0.639 | 1.057 | 0.718 | 1.556 | 0.779 |
| ebi-a-GCST90001613 | CD4-CD8- T cell %leukocyte | RC | TBNK | 20 | 1.000 | 0.836 | 1.198 | 0.996 | 1.013 | 0.814 | 0.221 | 0.912 | 1.020 | 0.807 | 1.290 | 0.868 |
| ebi-a-GCST90001614 | CD8+ and CD8dim T cell %leukocyte | RC | TBNK | 14 | 0.785 | 0.500 | 1.232 | 0.293 | 0.614 | 0.185 | 0.738 | 0.442 | 0.895 | 0.482 | 1.661 | 0.724 |
| ebi-a-GCST90001615 | TCRgd T cell AC | AC | TBNK | 19 | 1.096 | 0.826 | 1.453 | 0.526 | 1.006 | 0.663 | 0.418 | 0.979 | 1.125 | 0.769 | 1.645 | 0.546 |
| ebi-a-GCST90001616 | TCRgd T cell %T cell | RC | TBNK | 18 | 0.950 | 0.775 | 1.165 | 0.621 | 0.977 | 0.761 | 0.244 | 0.855 | 0.971 | 0.782 | 1.204 | 0.786 |
| ebi-a-GCST90001617 | TCRgd T cell %lymphocyte | RC | TBNK | 20 | 1.045 | 0.902 | 1.210 | 0.561 | 1.062 | 0.896 | 0.181 | 0.497 | 0.991 | 0.808 | 1.215 | 0.928 |
| ebi-a-GCST90001618 | HLA DR+ T cell AC | AC | TBNK | 29 | 0.988 | 0.827 | 1.181 | 0.896 | 1.125 | 0.877 | 0.281 | 0.362 | 1.068 | 0.855 | 1.334 | 0.561 |
| ebi-a-GCST90001619 | HLA DR+ T cell%T cell | RC | TBNK | 30 | 0.994 | 0.832 | 1.188 | 0.949 | 0.892 | 0.715 | 0.198 | 0.321 | 1.038 | 0.839 | 1.285 | 0.729 |
| ebi-a-GCST90001620 | HLA DR+ T cell%lymphocyte | RC | TBNK | 24 | 1.109 | 0.908 | 1.355 | 0.311 | 1.039 | 0.776 | 0.303 | 0.798 | 1.039 | 0.797 | 1.354 | 0.777 |
| ebi-a-GCST90001621 | Natural Killer T AC | AC | TBNK | 34 | 0.933 | 0.729 | 1.195 | 0.584 | 1.321 | 0.886 | 0.527 | 0.181 | 1.171 | 0.833 | 1.645 | 0.363 |
| ebi-a-GCST90001622 | Natural Killer T %T cell | RC | TBNK | 31 | 0.951 | 0.771 | 1.173 | 0.639 | 1.064 | 0.781 | 0.329 | 0.698 | 0.966 | 0.679 | 1.374 | 0.846 |
| ebi-a-GCST90001623 | Natural Killer T %lymphocyte | RC | TBNK | 31 | 0.962 | 0.773 | 1.196 | 0.725 | 1.095 | 0.796 | 0.350 | 0.580 | 0.965 | 0.686 | 1.356 | 0.836 |
| ebi-a-GCST90001624 | HLA DR+ CD4+ T cell AC | AC | TBNK | 24 | 1.078 | 0.925 | 1.256 | 0.337 | 1.266 | 1.049 | 0.237 | 0.022 | 1.159 | 0.945 | 1.422 | 0.157 |
| ebi-a-GCST90001625 | HLA DR+ CD4+ T cell %T cell | RC | TBNK | 24 | 1.209 | 0.872 | 1.676 | 0.255 | 1.538 | 0.856 | 0.901 | 0.164 | 1.246 | 0.771 | 2.016 | 0.369 |
| ebi-a-GCST90001626 | HLA DR+ CD4+ T cell %lymphocyte | RC | TBNK | 19 | 1.127 | 0.748 | 1.699 | 0.568 | 1.887 | 0.784 | 1.656 | 0.174 | 1.446 | 0.821 | 2.545 | 0.201 |
| ebi-a-GCST90001627 | HLA DR+ CD8+ T cell AC | AC | TBNK | 34 | 1.027 | 0.855 | 1.233 | 0.777 | 0.966 | 0.748 | 0.247 | 0.794 | 1.095 | 0.860 | 1.393 | 0.462 |
| ebi-a-GCST90001628 | HLA DR+ CD8+ T cell %T cell | RC | TBNK | 29 | 1.021 | 0.861 | 1.212 | 0.808 | 0.895 | 0.721 | 0.194 | 0.325 | 1.039 | 0.811 | 1.333 | 0.761 |
| ebi-a-GCST90001629 | HLA DR+ CD8+ T cell %lymphocyte | RC | TBNK | 29 | 1.191 | 0.953 | 1.487 | 0.124 | 1.100 | 0.777 | 0.383 | 0.596 | 1.142 | 0.852 | 1.530 | 0.374 |
| ebi-a-GCST90001630 | CD8+ Natural Killer T AC | AC | TBNK | 22 | 0.944 | 0.657 | 1.355 | 0.753 | 0.946 | 0.387 | 0.846 | 0.904 | 1.104 | 0.678 | 1.796 | 0.691 |
| ebi-a-GCST90001631 | CD8+ Natural Killer T %T cell | RC | TBNK | 24 | 0.765 | 0.535 | 1.095 | 0.143 | 0.694 | 0.338 | 0.500 | 0.331 | 0.867 | 0.517 | 1.454 | 0.588 |
| ebi-a-GCST90001632 | CD8+ Natural Killer T %lymphocyte | RC | TBNK | 25 | 0.797 | 0.569 | 1.118 | 0.189 | 0.913 | 0.466 | 0.614 | 0.793 | 0.787 | 0.486 | 1.275 | 0.331 |
| ebi-a-GCST90001633 | CD8dim Natural Killer T AC | AC | TBNK | 26 | 0.753 | 0.606 | 0.936 | 0.010 | 0.709 | 0.522 | 0.216 | 0.037 | 0.747 | 0.538 | 1.037 | 0.081 |
| ebi-a-GCST90001634 | CD8dim Natural Killer T %T cell | RC | TBNK | 19 | 0.913 | 0.693 | 1.202 | 0.517 | 0.969 | 0.618 | 0.436 | 0.893 | 0.947 | 0.654 | 1.371 | 0.773 |
| ebi-a-GCST90001635 | CD8dim Natural Killer T %lymphocyte | RC | TBNK | 25 | 0.906 | 0.700 | 1.172 | 0.452 | 0.927 | 0.595 | 0.411 | 0.742 | 0.946 | 0.671 | 1.333 | 0.750 |
| ebi-a-GCST90001636 | CD4-CD8- Natural Killer T AC | AC | TBNK | 10 | 0.925 | 0.566 | 1.511 | 0.756 | 0.740 | 0.097 | 1.502 | 0.779 | 1.079 | 0.560 | 2.080 | 0.821 |
| ebi-a-GCST90001637 | CD4-CD8- Natural Killer T %T cell | RC | TBNK | 30 | 1.074 | 0.802 | 1.438 | 0.633 | 1.116 | 0.630 | 0.640 | 0.709 | 0.990 | 0.649 | 1.511 | 0.964 |
| ebi-a-GCST90001638 | CD4-CD8- Natural Killer T %lymphocyte | RC | TBNK | 29 | 1.026 | 0.771 | 1.366 | 0.858 | 1.275 | 0.729 | 0.713 | 0.401 | 0.993 | 0.656 | 1.503 | 0.974 |
| ebi-a-GCST90001639 | CD3- lymphocyte AC | AC | TBNK | 16 | 0.885 | 0.612 | 1.281 | 0.519 | 0.811 | 0.398 | 0.578 | 0.573 | 0.837 | 0.513 | 1.366 | 0.476 |
| ebi-a-GCST90001640 | CD3- lymphocyte %lymphocyte | RC | TBNK | 6 | 1.085 | 0.515 | 2.286 | 0.830 | 0.227 | 0.011 | 0.692 | 0.395 | 1.097 | 0.422 | 2.854 | 0.850 |
| ebi-a-GCST90001641 | CD3- lymphocyte %leukocyte | RC | TBNK | 20 | 1.060 | 0.817 | 1.377 | 0.660 | 1.125 | 0.768 | 0.430 | 0.552 | 1.251 | 0.842 | 1.858 | 0.268 |
| ebi-a-GCST90001642 | B cell AC | AC | TBNK | 29 | 1.044 | 0.774 | 1.410 | 0.777 | 0.875 | 0.507 | 0.479 | 0.637 | 1.066 | 0.701 | 1.622 | 0.764 |
| ebi-a-GCST90001643 | B cell %CD3- lymphocyte | RC | TBNK | 28 | 1.134 | 0.973 | 1.320 | 0.107 | 1.106 | 0.908 | 0.218 | 0.327 | 1.155 | 0.937 | 1.424 | 0.176 |
| ebi-a-GCST90001644 | B cell %lymphocyte | RC | TBNK | 32 | 1.209 | 0.942 | 1.553 | 0.137 | 0.963 | 0.627 | 0.413 | 0.865 | 1.101 | 0.770 | 1.574 | 0.600 |
| ebi-a-GCST90001645 | Natural Killer AC | AC | TBNK | 22 | 1.034 | 0.747 | 1.432 | 0.838 | 0.749 | 0.429 | 0.417 | 0.321 | 0.826 | 0.537 | 1.272 | 0.386 |
| ebi-a-GCST90001646 | Natural Killer %CD3- lymphocyte | RC | TBNK | 27 | 0.934 | 0.813 | 1.073 | 0.333 | 0.910 | 0.759 | 0.165 | 0.320 | 0.867 | 0.712 | 1.055 | 0.154 |
| ebi-a-GCST90001647 | Natural Killer %lymphocyte | RC | TBNK | 27 | 1.071 | 0.885 | 1.296 | 0.479 | 1.127 | 0.869 | 0.293 | 0.376 | 1.146 | 0.882 | 1.489 | 0.308 |
| ebi-a-GCST90001648 | HLA DR+ Natural Killer AC | AC | TBNK | 16 | 1.287 | 0.891 | 1.858 | 0.179 | 0.938 | 0.512 | 0.568 | 0.838 | 1.042 | 0.683 | 1.590 | 0.849 |
| ebi-a-GCST90001649 | HLA DR+ Natural Killer %Natural Killer | RC | TBNK | 23 | 1.047 | 0.818 | 1.340 | 0.716 | 1.096 | 0.730 | 0.446 | 0.663 | 1.027 | 0.713 | 1.481 | 0.885 |
| ebi-a-GCST90001650 | HLA DR+ Natural Killer %CD3- lymphocyte | RC | TBNK | 22 | 1.186 | 0.920 | 1.528 | 0.188 | 0.917 | 0.615 | 0.366 | 0.673 | 1.032 | 0.726 | 1.469 | 0.860 |
| ebi-a-GCST90001651 | Granulocyte AC | AC | TBNK | 24 | 0.887 | 0.653 | 1.204 | 0.442 | 0.741 | 0.453 | 0.365 | 0.245 | 0.903 | 0.577 | 1.413 | 0.655 |
| ebi-a-GCST90001652 | Granulocyte %leukocyte | RC | TBNK | 25 | 1.091 | 0.860 | 1.384 | 0.475 | 0.938 | 0.661 | 0.329 | 0.725 | 1.069 | 0.758 | 1.508 | 0.702 |
| ebi-a-GCST90001653 | CD28- CD4-CD8- T cell %CD4-CD8- T cell | RC | Treg | 27 | 1.079 | 0.857 | 1.358 | 0.520 | 0.888 | 0.633 | 0.299 | 0.495 | 0.996 | 0.703 | 1.410 | 0.981 |
| ebi-a-GCST90001654 | CD28- CD4-CD8- T cell AC | AC | Treg | 31 | 0.917 | 0.699 | 1.202 | 0.529 | 0.899 | 0.586 | 0.385 | 0.629 | 0.915 | 0.622 | 1.346 | 0.652 |
| ebi-a-GCST90001655 | CD28+ CD4-CD8- T cell %T cell | RC | Treg | 23 | 0.754 | 0.560 | 1.016 | 0.063 | 0.877 | 0.542 | 0.422 | 0.599 | 0.704 | 0.443 | 1.121 | 0.139 |
| ebi-a-GCST90001656 | CD28+ CD4-CD8- T cell %CD4-CD8- T cell | RC | Treg | 27 | 0.927 | 0.736 | 1.168 | 0.520 | 1.127 | 0.804 | 0.380 | 0.495 | 1.004 | 0.710 | 1.420 | 0.981 |
| ebi-a-GCST90001657 | CD28+ CD4-CD8- T cell AC | AC | Treg | 10 | 1.174 | 0.704 | 1.957 | 0.540 | 0.689 | 0.298 | 0.576 | 0.407 | 1.051 | 0.510 | 2.167 | 0.892 |
| ebi-a-GCST90001658 | CD39+ CD4+ T cell %T cell | RC | Treg | 31 | 1.072 | 0.944 | 1.216 | 0.283 | 1.061 | 0.910 | 0.163 | 0.458 | 1.044 | 0.873 | 1.247 | 0.639 |
| ebi-a-GCST90001659 | CD39+ CD4+ T cell %CD4+ T cell | RC | Treg | 25 | 1.090 | 0.929 | 1.279 | 0.293 | 1.016 | 0.821 | 0.216 | 0.888 | 0.969 | 0.772 | 1.217 | 0.789 |
| ebi-a-GCST90001660 | CD39+ CD4+ T cell AC | AC | Treg | 29 | 1.084 | 0.930 | 1.262 | 0.302 | 1.026 | 0.830 | 0.217 | 0.814 | 1.083 | 0.843 | 1.391 | 0.534 |
| ebi-a-GCST90001661 | CD28- CD8dim T cell %T cell | RC | Treg | 24 | 0.884 | 0.706 | 1.108 | 0.285 | 0.829 | 0.596 | 0.273 | 0.276 | 0.905 | 0.631 | 1.298 | 0.587 |
| ebi-a-GCST90001662 | CD28- CD8dim T cell %CD8dim T cell | RC | Treg | 15 | 0.910 | 0.814 | 1.018 | 0.101 | 0.917 | 0.808 | 0.116 | 0.201 | 0.907 | 0.812 | 1.014 | 0.087 |
| ebi-a-GCST90001663 | CD28- CD8dim T cell AC | AC | Treg | 27 | 0.824 | 0.681 | 0.997 | 0.046 | 0.727 | 0.555 | 0.197 | 0.030 | 0.742 | 0.555 | 0.993 | 0.045 |
| ebi-a-GCST90001664 | CD28+ CD45RA+ CD8dim T cell %T cell | RC | Treg | 37 | 0.945 | 0.886 | 1.007 | 0.080 | 0.928 | 0.864 | 0.066 | 0.047 | 0.923 | 0.841 | 1.013 | 0.091 |
| ebi-a-GCST90001665 | CD28+ CD45RA+ CD8dim T cell %CD8dim T cell | RC | Treg | 26 | 0.912 | 0.808 | 1.029 | 0.136 | 0.867 | 0.754 | 0.120 | 0.054 | 0.921 | 0.786 | 1.080 | 0.312 |
| ebi-a-GCST90001666 | CD28+ CD45RA+ CD8dim T cell AC | AC | Treg | 48 | 1.011 | 0.971 | 1.052 | 0.600 | 1.020 | 0.975 | 0.046 | 0.394 | 1.021 | 0.954 | 1.093 | 0.550 |
| ebi-a-GCST90001667 | CD28+ CD45RA- CD8dim T cell %T cell | RC | Treg | 28 | 0.989 | 0.910 | 1.074 | 0.791 | 0.986 | 0.897 | 0.094 | 0.776 | 0.966 | 0.868 | 1.074 | 0.518 |
| ebi-a-GCST90001668 | CD28+ CD45RA- CD8dim T cell %CD8dim T cell | RC | Treg | 27 | 1.232 | 1.029 | 1.475 | 0.023 | 1.254 | 1.000 | 0.284 | 0.061 | 1.263 | 1.002 | 1.591 | 0.048 |
| ebi-a-GCST90001669 | CD28+ CD45RA- CD8dim T cell AC | AC | Treg | 35 | 0.978 | 0.929 | 1.029 | 0.385 | 0.978 | 0.920 | 0.059 | 0.470 | 0.993 | 0.923 | 1.067 | 0.840 |
| ebi-a-GCST90001670 | CD39+ CD8+ T cell %T cell | RC | Treg | 20 | 1.172 | 0.879 | 1.563 | 0.280 | 1.266 | 0.807 | 0.570 | 0.317 | 1.165 | 0.751 | 1.807 | 0.496 |
| ebi-a-GCST90001671 | CD39+ CD8+ T cell %CD8+ T cell | RC | Treg | 20 | 1.020 | 0.795 | 1.308 | 0.877 | 1.069 | 0.750 | 0.380 | 0.715 | 0.998 | 0.743 | 1.342 | 0.992 |
| ebi-a-GCST90001672 | CD39+ CD8+ T cell AC | AC | Treg | 23 | 1.046 | 0.823 | 1.331 | 0.711 | 1.149 | 0.814 | 0.396 | 0.438 | 1.219 | 0.894 | 1.660 | 0.210 |
| ebi-a-GCST90001673 | CD28- CD127- CD25++ CD8+ T cell %T cell | RC | Treg | 17 | 0.902 | 0.696 | 1.169 | 0.435 | 0.731 | 0.534 | 0.230 | 0.070 | 0.818 | 0.591 | 1.133 | 0.227 |
| ebi-a-GCST90001674 | CD28- CD127- CD25++ CD8+ T cell %CD8+ T cell | RC | Treg | 18 | 0.873 | 0.707 | 1.077 | 0.204 | 0.803 | 0.606 | 0.226 | 0.147 | 0.805 | 0.591 | 1.098 | 0.171 |
| ebi-a-GCST90001675 | CD28- CD127- CD25++ CD8+ T cell AC | AC | Treg | 27 | 0.978 | 0.829 | 1.154 | 0.793 | 0.908 | 0.737 | 0.189 | 0.373 | 0.976 | 0.758 | 1.258 | 0.852 |
| ebi-a-GCST90001676 | CD28- CD25++ CD8+ T cell %T cell | RC | Treg | 8 | 2.226 | 1.234 | 4.015 | 0.008 | 2.478 | 0.598 | 3.521 | 0.257 | 2.443 | 1.091 | 5.470 | 0.030 |
| ebi-a-GCST90001677 | CD28- CD25++ CD8+ T cell %CD8+ T cell | RC | Treg | 24 | 1.052 | 0.779 | 1.419 | 0.741 | 0.913 | 0.567 | 0.435 | 0.711 | 1.253 | 0.799 | 1.963 | 0.326 |
| ebi-a-GCST90001678 | CD28- CD25++ CD8+ T cell AC | AC | Treg | 24 | 0.948 | 0.783 | 1.147 | 0.582 | 0.972 | 0.763 | 0.235 | 0.819 | 1.010 | 0.766 | 1.331 | 0.945 |
| ebi-a-GCST90001679 | CD25++ CD8+ T cell %T cell | RC | Treg | 17 | 1.178 | 0.856 | 1.620 | 0.316 | 1.039 | 0.610 | 0.552 | 0.891 | 0.942 | 0.581 | 1.527 | 0.808 |
| ebi-a-GCST90001680 | CD25++ CD8+ T cell %CD8+ T cell | RC | Treg | 22 | 1.156 | 0.860 | 1.554 | 0.337 | 1.188 | 0.738 | 0.566 | 0.486 | 1.081 | 0.723 | 1.617 | 0.705 |
| ebi-a-GCST90001681 | CD25++ CD8+ T cell AC | AC | Treg | 26 | 1.224 | 0.911 | 1.644 | 0.180 | 0.755 | 0.458 | 0.379 | 0.284 | 0.922 | 0.630 | 1.349 | 0.676 |
| ebi-a-GCST90001682 | CD127- CD8+ T cell %T cell | RC | Treg | 14 | 0.970 | 0.644 | 1.461 | 0.886 | 1.191 | 0.468 | 1.114 | 0.720 | 1.042 | 0.592 | 1.832 | 0.887 |
| ebi-a-GCST90001683 | CD127- CD8+ T cell %CD8+ T cell | RC | Treg | 13 | 0.645 | 0.497 | 0.838 | 0.001 | 0.802 | 0.569 | 0.276 | 0.236 | 0.664 | 0.455 | 0.969 | 0.034 |
| ebi-a-GCST90001684 | CD127- CD8+ T cell AC | AC | Treg | 13 | 0.813 | 0.592 | 1.116 | 0.200 | 0.842 | 0.453 | 0.522 | 0.598 | 0.899 | 0.566 | 1.429 | 0.654 |
| ebi-a-GCST90001685 | CD28- CD8+ T cell %T cell | RC | Treg | 16 | 1.348 | 0.902 | 2.015 | 0.145 | 1.252 | 0.459 | 1.256 | 0.667 | 1.295 | 0.762 | 2.200 | 0.339 |
| ebi-a-GCST90001686 | CD28- CD8+ T cell %CD8+ T cell | RC | Treg | 22 | 1.113 | 0.786 | 1.575 | 0.548 | 0.752 | 0.367 | 0.538 | 0.444 | 0.871 | 0.535 | 1.417 | 0.578 |
| ebi-a-GCST90001687 | CD28- CD8+ T cell AC | AC | Treg | 14 | 1.044 | 0.659 | 1.653 | 0.855 | 1.311 | 0.331 | 1.803 | 0.706 | 1.235 | 0.671 | 2.273 | 0.498 |
| ebi-a-GCST90001688 | CD28+ CD45RA+ CD8+ T cell %T cell | RC | Treg | 87 | 1.021 | 0.995 | 1.047 | 0.121 | 1.040 | 1.006 | 0.034 | 0.021 | 1.039 | 1.000 | 1.079 | 0.048 |
| ebi-a-GCST90001689 | CD28+ CD45RA+ CD8+ T cell %CD8+ T cell | RC | Treg | 35 | 1.041 | 0.970 | 1.118 | 0.266 | 1.032 | 0.955 | 0.080 | 0.434 | 1.032 | 0.931 | 1.143 | 0.551 |
| ebi-a-GCST90001690 | CD28+ CD45RA+ CD8+ T cell AC | AC | Treg | 53 | 1.024 | 0.982 | 1.069 | 0.268 | 1.032 | 0.984 | 0.049 | 0.199 | 1.046 | 0.984 | 1.113 | 0.149 |
| ebi-a-GCST90001691 | CD28+ CD45RA- CD8+ T cell %T cell | RC | Treg | 26 | 1.035 | 0.943 | 1.136 | 0.470 | 1.037 | 0.935 | 0.108 | 0.501 | 1.029 | 0.915 | 1.157 | 0.633 |
| ebi-a-GCST90001692 | CD28+ CD45RA- CD8+ T cell %CD8+ T cell | RC | Treg | 26 | 1.019 | 0.930 | 1.116 | 0.684 | 1.042 | 0.940 | 0.107 | 0.442 | 1.030 | 0.921 | 1.152 | 0.610 |
| ebi-a-GCST90001693 | CD28+ CD45RA- CD8+ T cell AC | AC | Treg | 28 | 1.044 | 0.933 | 1.168 | 0.452 | 1.034 | 0.908 | 0.135 | 0.618 | 1.035 | 0.920 | 1.165 | 0.568 |
| ebi-a-GCST90001694 | CD28- CD4-CD8- T cell %T cell | RC | Treg | 22 | 1.128 | 0.873 | 1.457 | 0.357 | 0.989 | 0.671 | 0.384 | 0.955 | 0.942 | 0.649 | 1.366 | 0.751 |
| ebi-a-GCST90001695 | CD45RA- CD28- CD8+ T cell AC | AC | Treg | 324 | 1.000 | 1.000 | 1.000 | 0.461 | 1.000 | 1.000 | 0.000 | 0.804 | 1.000 | 1.000 | 1.000 | 0.842 |
| ebi-a-GCST90001696 | CD45RA- CD28- CD8+ T cell %CD8+ T cell | RC | Treg | 50 | 1.001 | 0.997 | 1.005 | 0.662 | 1.000 | 0.995 | 0.005 | 0.937 | 1.001 | 0.995 | 1.008 | 0.665 |
| ebi-a-GCST90001697 | CD45RA- CD28- CD8+ T cell %T cell | RC | Treg | 170 | 0.999 | 0.996 | 1.003 | 0.673 | 0.997 | 0.993 | 0.005 | 0.270 | 0.996 | 0.990 | 1.001 | 0.142 |
| ebi-a-GCST90001698 | CD45RA+ CD28- CD8+ T cell AC | AC | Treg | 690 | 1.000 | 1.000 | 1.000 | 0.915 | 1.000 | 1.000 | 0.000 | 0.217 | 1.000 | 1.000 | 1.000 | 0.920 |
| ebi-a-GCST90001699 | CD45RA+ CD28- CD8+ T cell %CD8+ T cell | RC | Treg | 29 | 0.997 | 0.992 | 1.002 | 0.269 | 0.998 | 0.992 | 0.006 | 0.479 | 0.997 | 0.990 | 1.005 | 0.516 |
| ebi-a-GCST90001700 | CD45RA+ CD28- CD8+ T cell %T cell | RC | Treg | 196 | 0.998 | 0.995 | 1.001 | 0.124 | 0.999 | 0.995 | 0.004 | 0.452 | 0.999 | 0.994 | 1.003 | 0.493 |
| ebi-a-GCST90001701 | BAFF-R on CD20- CD38- B cell | MFI | B cell | 16 | 1.031 | 0.836 | 1.271 | 0.778 | 0.938 | 0.696 | 0.280 | 0.681 | 1.028 | 0.782 | 1.352 | 0.843 |
| ebi-a-GCST90001702 | BAFF-R on CD24+ CD27+ B cell | MFI | B cell | 18 | 1.085 | 0.919 | 1.282 | 0.336 | 1.217 | 0.974 | 0.271 | 0.103 | 1.068 | 0.873 | 1.308 | 0.521 |
| ebi-a-GCST90001703 | BAFF-R on IgD+ CD24+ B cell | MFI | B cell | 17 | 1.111 | 0.937 | 1.318 | 0.225 | 1.149 | 0.906 | 0.273 | 0.270 | 1.096 | 0.885 | 1.356 | 0.401 |
| ebi-a-GCST90001704 | BAFF-R on IgD+ CD24- B cell | MFI | B cell | 22 | 1.111 | 0.931 | 1.326 | 0.244 | 1.344 | 1.098 | 0.271 | 0.010 | 1.109 | 0.893 | 1.378 | 0.349 |
| ebi-a-GCST90001705 | BAFF-R on IgD+ CD38- B cell | MFI | B cell | 22 | 1.099 | 0.928 | 1.301 | 0.275 | 1.227 | 0.986 | 0.269 | 0.082 | 1.099 | 0.884 | 1.366 | 0.395 |
| ebi-a-GCST90001706 | BAFF-R on IgD+ CD38- naive B cell | MFI | B cell | 28 | 1.032 | 0.864 | 1.233 | 0.727 | 1.093 | 0.830 | 0.301 | 0.533 | 1.057 | 0.847 | 1.320 | 0.624 |
| ebi-a-GCST90001707 | BAFF-R on IgD+ CD38- unswitched memory B cell | MFI | B cell | 17 | 1.003 | 0.831 | 1.211 | 0.974 | 1.093 | 0.834 | 0.295 | 0.529 | 1.038 | 0.837 | 1.288 | 0.733 |
| ebi-a-GCST90001708 | BAFF-R on IgD+ CD38+ B cell | MFI | B cell | 26 | 1.132 | 0.964 | 1.329 | 0.130 | 1.090 | 0.867 | 0.250 | 0.467 | 1.053 | 0.845 | 1.313 | 0.644 |
| ebi-a-GCST90001709 | BAFF-R on IgD+ CD38dim B cell | MFI | B cell | 25 | 1.060 | 0.924 | 1.215 | 0.407 | 1.182 | 0.990 | 0.209 | 0.077 | 1.091 | 0.891 | 1.336 | 0.398 |
| ebi-a-GCST90001710 | BAFF-R on IgD- CD24- B cell | MFI | B cell | 21 | 1.084 | 0.895 | 1.313 | 0.411 | 1.180 | 0.916 | 0.298 | 0.215 | 1.053 | 0.832 | 1.334 | 0.667 |
| ebi-a-GCST90001711 | BAFF-R on IgD- CD27- B cell | MFI | B cell | 17 | 1.013 | 0.845 | 1.213 | 0.892 | 1.066 | 0.840 | 0.254 | 0.606 | 1.049 | 0.829 | 1.327 | 0.690 |
| ebi-a-GCST90001712 | BAFF-R on IgD- CD38- B cell | MFI | B cell | 17 | 1.072 | 0.907 | 1.267 | 0.414 | 1.151 | 0.915 | 0.265 | 0.248 | 1.059 | 0.860 | 1.303 | 0.591 |
| ebi-a-GCST90001713 | BAFF-R on IgD- CD38+ B cell | MFI | B cell | 14 | 1.251 | 0.880 | 1.779 | 0.212 | 1.440 | 0.753 | 0.934 | 0.292 | 1.314 | 0.836 | 2.064 | 0.237 |
| ebi-a-GCST90001714 | BAFF-R on IgD- CD38dim B cell | MFI | B cell | 4 | 1.041 | 0.689 | 1.572 | 0.850 | 1.285 | 0.757 | 0.680 | 0.451 | 1.126 | 0.691 | 1.833 | 0.635 |
| ebi-a-GCST90001715 | BAFF-R on memory B cell | MFI | B cell | 15 | 1.102 | 0.924 | 1.314 | 0.280 | 1.216 | 0.958 | 0.290 | 0.132 | 1.107 | 0.893 | 1.372 | 0.355 |
| ebi-a-GCST90001716 | BAFF-R on naive-mature B cell | MFI | B cell | 23 | 1.082 | 0.918 | 1.275 | 0.345 | 1.244 | 0.993 | 0.280 | 0.072 | 1.093 | 0.886 | 1.350 | 0.406 |
| ebi-a-GCST90001717 | BAFF-R on unswitched memory B cell | MFI | B cell | 22 | 1.078 | 0.926 | 1.255 | 0.332 | 1.227 | 1.007 | 0.243 | 0.056 | 1.099 | 0.899 | 1.344 | 0.358 |
| ebi-a-GCST90001718 | BAFF-R on switched memory B cell | MFI | B cell | 18 | 1.079 | 0.912 | 1.275 | 0.375 | 1.215 | 0.962 | 0.284 | 0.122 | 1.062 | 0.859 | 1.313 | 0.580 |
| ebi-a-GCST90001719 | BAFF-R on IgD+ B cell | MFI | B cell | 24 | 1.066 | 0.901 | 1.262 | 0.455 | 1.257 | 1.011 | 0.273 | 0.052 | 1.096 | 0.878 | 1.369 | 0.419 |
| ebi-a-GCST90001720 | BAFF-R on transitional B cell | MFI | B cell | 23 | 1.137 | 0.955 | 1.354 | 0.148 | 1.126 | 0.886 | 0.271 | 0.344 | 1.071 | 0.850 | 1.349 | 0.561 |
| ebi-a-GCST90001721 | CD19 on CD20- B cell | MFI | B cell | 20 | 0.953 | 0.710 | 1.277 | 0.745 | 1.103 | 0.731 | 0.454 | 0.646 | 1.056 | 0.682 | 1.633 | 0.808 |
| ebi-a-GCST90001722 | CD19 on CD20- CD38- B cell | MFI | B cell | 19 | 1.218 | 0.890 | 1.667 | 0.218 | 1.266 | 0.730 | 0.697 | 0.412 | 1.456 | 0.923 | 2.296 | 0.106 |
| ebi-a-GCST90001723 | CD19 on CD24+ CD27+ B cell | MFI | B cell | 29 | 1.013 | 0.810 | 1.266 | 0.912 | 0.931 | 0.677 | 0.297 | 0.665 | 1.047 | 0.777 | 1.409 | 0.765 |
| ebi-a-GCST90001724 | CD19 on IgD+ CD24+ B cell | MFI | B cell | 33 | 0.889 | 0.766 | 1.030 | 0.118 | 0.798 | 0.667 | 0.143 | 0.019 | 0.824 | 0.676 | 1.003 | 0.054 |
| ebi-a-GCST90001725 | CD19 on IgD+ CD24- B cell | MFI | B cell | 25 | 1.040 | 0.901 | 1.200 | 0.594 | 1.016 | 0.856 | 0.173 | 0.860 | 1.048 | 0.873 | 1.256 | 0.616 |
| ebi-a-GCST90001726 | CD19 on IgD+ CD38- B cell | MFI | B cell | 30 | 0.981 | 0.853 | 1.128 | 0.785 | 1.083 | 0.923 | 0.173 | 0.335 | 0.965 | 0.803 | 1.160 | 0.704 |
| ebi-a-GCST90001727 | CD19 on IgD+ CD38- naive B cell | MFI | B cell | 19 | 0.980 | 0.865 | 1.110 | 0.750 | 1.000 | 0.865 | 0.146 | 0.998 | 1.018 | 0.862 | 1.203 | 0.830 |
| ebi-a-GCST90001728 | CD19 on IgD+ CD38- unswitched memory B cell | MFI | B cell | 21 | 0.981 | 0.864 | 1.114 | 0.769 | 0.991 | 0.819 | 0.189 | 0.924 | 1.014 | 0.838 | 1.227 | 0.888 |
| ebi-a-GCST90001729 | CD19 on IgD+ CD38+ B cell | MFI | B cell | 21 | 0.931 | 0.724 | 1.197 | 0.575 | 0.973 | 0.679 | 0.350 | 0.884 | 1.007 | 0.718 | 1.413 | 0.966 |
| ebi-a-GCST90001730 | CD19 on IgD+ CD38dim B cell | MFI | B cell | 24 | 1.028 | 0.899 | 1.175 | 0.685 | 1.044 | 0.887 | 0.170 | 0.606 | 1.046 | 0.874 | 1.252 | 0.620 |
| ebi-a-GCST90001731 | CD19 on IgD- CD24- B cell | MFI | B cell | 23 | 1.191 | 0.868 | 1.632 | 0.279 | 1.168 | 0.650 | 0.685 | 0.609 | 0.974 | 0.612 | 1.548 | 0.911 |
| ebi-a-GCST90001732 | CD19 on IgD- CD27- B cell | MFI | B cell | 26 | 1.350 | 1.001 | 1.820 | 0.050 | 0.959 | 0.586 | 0.472 | 0.869 | 1.001 | 0.640 | 1.566 | 0.995 |
| ebi-a-GCST90001733 | CD19 on IgD- CD38- B cell | MFI | B cell | 22 | 1.435 | 1.035 | 1.990 | 0.030 | 1.457 | 0.780 | 0.910 | 0.251 | 1.526 | 0.940 | 2.477 | 0.087 |
| ebi-a-GCST90001734 | CD19 on IgD- CD38+ B cell | MFI | B cell | 16 | 1.160 | 0.802 | 1.678 | 0.431 | 0.758 | 0.425 | 0.439 | 0.364 | 0.842 | 0.516 | 1.374 | 0.492 |
| ebi-a-GCST90001735 | CD19 on IgD- CD38dim B cell | MFI | B cell | 27 | 0.832 | 0.644 | 1.074 | 0.158 | 0.644 | 0.445 | 0.238 | 0.028 | 0.848 | 0.593 | 1.213 | 0.366 |
| ebi-a-GCST90001736 | CD19 on memory B cell | MFI | B cell | 23 | 1.071 | 0.805 | 1.425 | 0.637 | 0.881 | 0.551 | 0.413 | 0.602 | 0.993 | 0.645 | 1.527 | 0.973 |
| ebi-a-GCST90001737 | CD19 on naive-mature B cell | MFI | B cell | 27 | 0.968 | 0.848 | 1.105 | 0.631 | 1.040 | 0.886 | 0.167 | 0.633 | 1.051 | 0.888 | 1.243 | 0.564 |
| ebi-a-GCST90001738 | CD19 on unswitched memory B cell | MFI | B cell | 21 | 0.932 | 0.761 | 1.142 | 0.497 | 0.832 | 0.657 | 0.197 | 0.144 | 0.811 | 0.605 | 1.086 | 0.160 |
| ebi-a-GCST90001739 | CD19 on Plasma Blast-Plasma Cell | MFI | B cell | 22 | 0.927 | 0.652 | 1.318 | 0.674 | 1.150 | 0.604 | 0.742 | 0.675 | 0.889 | 0.529 | 1.494 | 0.657 |
| ebi-a-GCST90001740 | CD19 on switched memory B cell | MFI | B cell | 27 | 0.780 | 0.581 | 1.046 | 0.097 | 0.595 | 0.354 | 0.310 | 0.062 | 0.595 | 0.394 | 0.899 | 0.014 |
| ebi-a-GCST90001741 | CD19 on IgD+ B cell | MFI | B cell | 27 | 1.016 | 0.890 | 1.159 | 0.816 | 1.061 | 0.908 | 0.166 | 0.463 | 1.050 | 0.880 | 1.253 | 0.591 |
| ebi-a-GCST90001742 | CD19 on transitional B cell | MFI | B cell | 26 | 1.061 | 0.843 | 1.334 | 0.614 | 1.147 | 0.836 | 0.364 | 0.404 | 1.078 | 0.795 | 1.461 | 0.629 |
| ebi-a-GCST90001743 | CD20 on B cell | MFI | B cell | 21 | 1.024 | 0.776 | 1.352 | 0.866 | 1.279 | 0.686 | 0.797 | 0.448 | 0.994 | 0.678 | 1.459 | 0.977 |
| ebi-a-GCST90001744 | CD20 on CD20- CD38- B cell | MFI | B cell | 15 | 0.848 | 0.614 | 1.172 | 0.318 | 0.968 | 0.590 | 0.480 | 0.901 | 0.857 | 0.566 | 1.297 | 0.465 |
| ebi-a-GCST90001745 | CD20 on CD24+ CD27+ B cell | MFI | B cell | 29 | 0.945 | 0.740 | 1.207 | 0.650 | 0.868 | 0.571 | 0.363 | 0.511 | 0.941 | 0.671 | 1.318 | 0.723 |
| ebi-a-GCST90001746 | CD20 on IgD+ CD24+ B cell | MFI | B cell | 22 | 1.064 | 0.808 | 1.401 | 0.661 | 1.014 | 0.663 | 0.430 | 0.951 | 0.991 | 0.657 | 1.495 | 0.967 |
| ebi-a-GCST90001747 | CD20 on IgD+ CD24- B cell | MFI | B cell | 22 | 1.090 | 0.957 | 1.242 | 0.192 | 1.045 | 0.895 | 0.162 | 0.587 | 0.997 | 0.839 | 1.185 | 0.974 |
| ebi-a-GCST90001748 | CD20 on IgD+ CD38- B cell | MFI | B cell | 25 | 1.122 | 0.901 | 1.396 | 0.304 | 1.078 | 0.799 | 0.323 | 0.627 | 1.129 | 0.831 | 1.534 | 0.436 |
| ebi-a-GCST90001749 | CD20 on IgD+ CD38- naive B cell | MFI | B cell | 17 | 1.050 | 0.819 | 1.346 | 0.702 | 1.172 | 0.738 | 0.543 | 0.511 | 0.990 | 0.681 | 1.438 | 0.958 |
| ebi-a-GCST90001750 | CD20 on IgD+ CD38- unswitched memory B cell | MFI | B cell | 19 | 1.056 | 0.789 | 1.414 | 0.715 | 0.736 | 0.322 | 0.608 | 0.476 | 1.041 | 0.716 | 1.516 | 0.832 |
| ebi-a-GCST90001751 | CD20 on IgD+ CD38+ B cell | MFI | B cell | 25 | 1.368 | 1.103 | 1.697 | 0.004 | 1.118 | 0.820 | 0.347 | 0.486 | 1.242 | 0.901 | 1.712 | 0.185 |
| ebi-a-GCST90001752 | CD20 on IgD+ CD38dim B cell | MFI | B cell | 27 | 1.288 | 1.032 | 1.606 | 0.025 | 1.270 | 0.907 | 0.428 | 0.176 | 1.336 | 0.941 | 1.897 | 0.105 |
| ebi-a-GCST90001753 | CD20 on IgD- CD24- B cell | MFI | B cell | 26 | 0.778 | 0.613 | 0.988 | 0.040 | 0.704 | 0.503 | 0.236 | 0.051 | 0.732 | 0.521 | 1.027 | 0.071 |
| ebi-a-GCST90001754 | CD20 on IgD- CD27- B cell | MFI | B cell | 18 | 0.928 | 0.662 | 1.301 | 0.664 | 0.936 | 0.415 | 0.762 | 0.876 | 0.925 | 0.599 | 1.429 | 0.726 |
| ebi-a-GCST90001755 | CD20 on IgD- CD38- B cell | MFI | B cell | 27 | 0.926 | 0.688 | 1.247 | 0.614 | 1.057 | 0.599 | 0.599 | 0.850 | 0.954 | 0.617 | 1.474 | 0.831 |
| ebi-a-GCST90001756 | CD20 on IgD- CD38+ B cell | MFI | B cell | 14 | 1.057 | 0.852 | 1.312 | 0.612 | 1.120 | 0.868 | 0.286 | 0.400 | 1.040 | 0.825 | 1.311 | 0.742 |
| ebi-a-GCST90001757 | CD20 on IgD- CD38dim B cell | MFI | B cell | 33 | 1.044 | 0.965 | 1.130 | 0.284 | 1.068 | 0.980 | 0.092 | 0.144 | 1.061 | 0.962 | 1.169 | 0.236 |
| ebi-a-GCST90001758 | CD20 on memory B cell | MFI | B cell | 27 | 0.947 | 0.764 | 1.173 | 0.617 | 1.071 | 0.805 | 0.306 | 0.641 | 1.110 | 0.813 | 1.515 | 0.511 |
| ebi-a-GCST90001759 | CD20 on naive-mature B cell | MFI | B cell | 22 | 1.048 | 0.923 | 1.190 | 0.467 | 1.009 | 0.870 | 0.150 | 0.903 | 0.992 | 0.835 | 1.179 | 0.930 |
| ebi-a-GCST90001760 | CD20 on unswitched memory B cell | MFI | B cell | 20 | 0.982 | 0.794 | 1.213 | 0.863 | 1.023 | 0.778 | 0.281 | 0.871 | 1.100 | 0.814 | 1.485 | 0.535 |
| ebi-a-GCST90001761 | CD20 on switched memory B cell | MFI | B cell | 29 | 0.873 | 0.701 | 1.089 | 0.228 | 0.876 | 0.607 | 0.321 | 0.485 | 0.942 | 0.677 | 1.312 | 0.725 |
| ebi-a-GCST90001762 | CD20 on IgD+ B cell | MFI | B cell | 17 | 1.025 | 0.885 | 1.186 | 0.741 | 0.987 | 0.827 | 0.175 | 0.888 | 0.997 | 0.833 | 1.194 | 0.976 |
| ebi-a-GCST90001763 | CD20 on transitional B cell | MFI | B cell | 22 | 0.993 | 0.889 | 1.109 | 0.897 | 0.940 | 0.830 | 0.117 | 0.342 | 0.886 | 0.749 | 1.048 | 0.159 |
| ebi-a-GCST90001764 | CD24 on CD24+ CD27+ B cell | MFI | B cell | 3 | 0.960 | 0.553 | 1.667 | 0.884 | 1.257 | 0.623 | 0.883 | 0.638 | 0.985 | 0.534 | 1.818 | 0.962 |
| ebi-a-GCST90001765 | CD24 on IgD+ CD24+ B cell | MFI | B cell | 24 | 0.972 | 0.846 | 1.117 | 0.688 | 0.947 | 0.800 | 0.160 | 0.530 | 1.043 | 0.862 | 1.263 | 0.662 |
| ebi-a-GCST90001766 | CD24 on IgD+ CD38- B cell | MFI | B cell | 21 | 1.014 | 0.843 | 1.220 | 0.883 | 1.030 | 0.800 | 0.260 | 0.821 | 1.026 | 0.786 | 1.338 | 0.851 |
| ebi-a-GCST90001767 | CD24 on IgD+ CD38- unswitched memory B cell | MFI | B cell | 21 | 0.923 | 0.780 | 1.092 | 0.352 | 0.833 | 0.630 | 0.233 | 0.217 | 0.890 | 0.693 | 1.142 | 0.359 |
| ebi-a-GCST90001768 | CD24 on IgD+ CD38+ B cell | MFI | B cell | 25 | 0.957 | 0.788 | 1.163 | 0.660 | 0.974 | 0.744 | 0.262 | 0.847 | 0.961 | 0.729 | 1.267 | 0.779 |
| ebi-a-GCST90001769 | CD24 on IgD- CD38- B cell | MFI | B cell | 28 | 1.078 | 0.914 | 1.272 | 0.374 | 0.985 | 0.786 | 0.223 | 0.900 | 1.038 | 0.849 | 1.269 | 0.717 |
| ebi-a-GCST90001770 | CD24 on IgD- CD38dim B cell | MFI | B cell | 6 | 1.122 | 0.645 | 1.950 | 0.684 | 1.081 | 0.472 | 0.896 | 0.863 | 1.047 | 0.508 | 2.158 | 0.901 |
| ebi-a-GCST90001771 | CD24 on memory B cell | MFI | B cell | 29 | 1.038 | 0.884 | 1.219 | 0.646 | 0.987 | 0.798 | 0.209 | 0.902 | 0.974 | 0.781 | 1.215 | 0.816 |
| ebi-a-GCST90001772 | CD24 on unswitched memory B cell | MFI | B cell | 21 | 1.013 | 0.869 | 1.181 | 0.868 | 0.948 | 0.782 | 0.182 | 0.594 | 1.045 | 0.839 | 1.301 | 0.694 |
| ebi-a-GCST90001773 | CD24 on switched memory B cell | MFI | B cell | 38 | 1.001 | 0.859 | 1.166 | 0.994 | 0.985 | 0.799 | 0.207 | 0.888 | 1.026 | 0.817 | 1.289 | 0.825 |
| ebi-a-GCST90001774 | CD24 on transitional B cell | MFI | B cell | 20 | 0.961 | 0.676 | 1.366 | 0.823 | 0.681 | 0.351 | 0.451 | 0.271 | 0.898 | 0.555 | 1.454 | 0.661 |
| ebi-a-GCST90001775 | CD25 on B cell | MFI | B cell | 23 | 1.152 | 0.954 | 1.390 | 0.140 | 1.150 | 0.913 | 0.265 | 0.249 | 1.144 | 0.894 | 1.463 | 0.286 |
| ebi-a-GCST90001776 | CD25 on CD20- CD38- B cell | MFI | B cell | 19 | 1.196 | 0.907 | 1.576 | 0.204 | 1.237 | 0.822 | 0.506 | 0.321 | 1.233 | 0.853 | 1.781 | 0.265 |
| ebi-a-GCST90001777 | CD25 on CD24+ CD27+ B cell | MFI | B cell | 22 | 0.955 | 0.875 | 1.043 | 0.306 | 0.940 | 0.853 | 0.091 | 0.223 | 0.949 | 0.854 | 1.054 | 0.329 |
| ebi-a-GCST90001778 | CD25 on IgD+ CD24+ B cell | MFI | B cell | 26 | 0.942 | 0.828 | 1.072 | 0.364 | 0.883 | 0.754 | 0.139 | 0.133 | 0.882 | 0.730 | 1.066 | 0.195 |
| ebi-a-GCST90001779 | CD25 on IgD+ CD24- B cell | MFI | B cell | 23 | 1.128 | 0.960 | 1.324 | 0.142 | 1.141 | 0.936 | 0.226 | 0.206 | 1.161 | 0.917 | 1.470 | 0.215 |
| ebi-a-GCST90001780 | CD25 on IgD+ CD38- B cell | MFI | B cell | 27 | 0.957 | 0.851 | 1.076 | 0.466 | 0.981 | 0.853 | 0.137 | 0.787 | 0.901 | 0.741 | 1.095 | 0.293 |
| ebi-a-GCST90001781 | CD25 on IgD+ CD38- naive B cell | MFI | B cell | 25 | 1.212 | 1.012 | 1.452 | 0.037 | 1.054 | 0.811 | 0.276 | 0.698 | 1.152 | 0.884 | 1.502 | 0.294 |
| ebi-a-GCST90001782 | CD25 on IgD+ CD38- unswitched memory B cell | MFI | B cell | 24 | 1.010 | 0.885 | 1.153 | 0.882 | 0.962 | 0.813 | 0.163 | 0.662 | 1.016 | 0.854 | 1.207 | 0.861 |
| ebi-a-GCST90001783 | CD25 on IgD+ CD38+ B cell | MFI | B cell | 12 | 1.069 | 0.733 | 1.558 | 0.730 | 1.613 | 0.641 | 1.490 | 0.334 | 1.070 | 0.654 | 1.751 | 0.789 |
| ebi-a-GCST90001784 | CD25 on IgD+ CD38dim B cell | MFI | B cell | 21 | 1.208 | 1.017 | 1.435 | 0.031 | 1.252 | 1.004 | 0.276 | 0.061 | 1.192 | 0.946 | 1.502 | 0.136 |
| ebi-a-GCST90001785 | CD25 on IgD- CD24- B cell | MFI | B cell | 25 | 1.058 | 0.780 | 1.434 | 0.719 | 1.261 | 0.715 | 0.716 | 0.432 | 1.196 | 0.755 | 1.892 | 0.446 |
| ebi-a-GCST90001786 | CD25 on IgD- CD27- B cell | MFI | B cell | 21 | 1.076 | 0.745 | 1.554 | 0.696 | 1.014 | 0.487 | 0.744 | 0.970 | 1.273 | 0.770 | 2.102 | 0.346 |
| ebi-a-GCST90001787 | CD25 on IgD- CD38- B cell | MFI | B cell | 21 | 1.142 | 0.939 | 1.388 | 0.184 | 1.207 | 0.933 | 0.311 | 0.169 | 1.181 | 0.910 | 1.533 | 0.211 |
| ebi-a-GCST90001788 | CD25 on IgD- CD38+ B cell | MFI | B cell | 18 | 1.101 | 0.660 | 1.837 | 0.713 | 0.932 | 0.388 | 0.816 | 0.876 | 0.873 | 0.479 | 1.589 | 0.656 |
| ebi-a-GCST90001789 | CD25 on IgD- CD38dim B cell | MFI | B cell | 19 | 1.111 | 0.834 | 1.479 | 0.472 | 1.168 | 0.757 | 0.507 | 0.492 | 0.988 | 0.656 | 1.486 | 0.952 |
| ebi-a-GCST90001790 | CD25 on memory B cell | MFI | B cell | 22 | 0.951 | 0.760 | 1.189 | 0.659 | 1.033 | 0.763 | 0.314 | 0.836 | 0.944 | 0.695 | 1.281 | 0.709 |
| ebi-a-GCST90001791 | CD25 on naive-mature B cell | MFI | B cell | 23 | 1.174 | 0.895 | 1.540 | 0.247 | 1.149 | 0.774 | 0.454 | 0.499 | 0.925 | 0.619 | 1.383 | 0.704 |
| ebi-a-GCST90001792 | CD25 on unswitched memory B cell | MFI | B cell | 23 | 0.933 | 0.820 | 1.061 | 0.290 | 0.905 | 0.777 | 0.137 | 0.211 | 0.885 | 0.736 | 1.064 | 0.195 |
| ebi-a-GCST90001793 | CD25 on switched memory B cell | MFI | B cell | 18 | 1.251 | 0.765 | 2.046 | 0.372 | 1.063 | 0.331 | 1.240 | 0.920 | 1.290 | 0.749 | 2.223 | 0.358 |
| ebi-a-GCST90001794 | CD25 on IgD+ B cell | MFI | B cell | 25 | 1.178 | 1.010 | 1.374 | 0.037 | 1.219 | 1.010 | 0.230 | 0.050 | 1.172 | 0.946 | 1.452 | 0.146 |
| ebi-a-GCST90001795 | CD25 on transitional B cell | MFI | B cell | 22 | 1.309 | 0.983 | 1.743 | 0.065 | 1.311 | 0.845 | 0.577 | 0.241 | 1.295 | 0.878 | 1.911 | 0.193 |
| ebi-a-GCST90001796 | CD27 on CD20- B cell | MFI | B cell | 14 | 1.125 | 0.886 | 1.429 | 0.333 | 1.030 | 0.764 | 0.309 | 0.849 | 1.039 | 0.772 | 1.399 | 0.800 |
| ebi-a-GCST90001797 | CD27 on CD20- CD38- B cell | MFI | B cell | 20 | 0.735 | 0.556 | 0.973 | 0.031 | 0.794 | 0.546 | 0.298 | 0.245 | 0.714 | 0.463 | 1.102 | 0.128 |
| ebi-a-GCST90001798 | CD27 on CD24+ CD27+ B cell | MFI | B cell | 29 | 0.971 | 0.793 | 1.190 | 0.777 | 0.998 | 0.692 | 0.365 | 0.990 | 0.930 | 0.682 | 1.268 | 0.645 |
| ebi-a-GCST90001799 | CD27 on T cell | MFI | B cell | 21 | 0.874 | 0.762 | 1.002 | 0.053 | 0.877 | 0.743 | 0.145 | 0.135 | 0.853 | 0.703 | 1.036 | 0.108 |
| ebi-a-GCST90001800 | CD27 on IgD+ CD24+ B cell | MFI | B cell | 31 | 1.050 | 0.889 | 1.240 | 0.569 | 1.140 | 0.909 | 0.259 | 0.267 | 1.022 | 0.798 | 1.310 | 0.861 |
| ebi-a-GCST90001801 | CD27 on IgD+ CD38- unswitched memory B cell | MFI | B cell | 23 | 0.984 | 0.822 | 1.178 | 0.859 | 1.194 | 0.865 | 0.385 | 0.294 | 1.031 | 0.810 | 1.313 | 0.802 |
| ebi-a-GCST90001802 | CD27 on IgD- CD38- B cell | MFI | B cell | 29 | 0.948 | 0.767 | 1.172 | 0.623 | 1.010 | 0.679 | 0.401 | 0.962 | 0.905 | 0.665 | 1.233 | 0.529 |
| ebi-a-GCST90001803 | CD27 on IgD- CD38+ B cell | MFI | B cell | 15 | 0.979 | 0.621 | 1.546 | 0.929 | 0.311 | 0.039 | 0.647 | 0.291 | 0.743 | 0.398 | 1.385 | 0.349 |
| ebi-a-GCST90001804 | CD27 on IgD- CD38dim B cell | MFI | B cell | 31 | 1.035 | 0.895 | 1.198 | 0.639 | 1.068 | 0.884 | 0.202 | 0.498 | 1.080 | 0.883 | 1.321 | 0.455 |
| ebi-a-GCST90001805 | CD27 on memory B cell | MFI | B cell | 25 | 1.014 | 0.884 | 1.164 | 0.842 | 0.980 | 0.823 | 0.170 | 0.819 | 1.076 | 0.888 | 1.303 | 0.455 |
| ebi-a-GCST90001806 | CD27 on unswitched memory B cell | MFI | B cell | 30 | 0.943 | 0.750 | 1.186 | 0.616 | 0.763 | 0.484 | 0.348 | 0.255 | 0.889 | 0.620 | 1.275 | 0.523 |
| ebi-a-GCST90001807 | CD27 on Plasma Blast-Plasma Cell | MFI | B cell | 18 | 0.946 | 0.697 | 1.286 | 0.724 | 0.902 | 0.591 | 0.382 | 0.640 | 0.933 | 0.613 | 1.421 | 0.747 |
| ebi-a-GCST90001808 | CD27 on switched memory B cell | MFI | B cell | 30 | 0.877 | 0.703 | 1.094 | 0.245 | 1.070 | 0.681 | 0.483 | 0.771 | 0.856 | 0.617 | 1.188 | 0.354 |
| ebi-a-GCST90001809 | CD38 on CD20- B cell | MFI | B cell | 19 | 1.060 | 0.696 | 1.616 | 0.786 | 1.019 | 0.375 | 1.018 | 0.971 | 0.923 | 0.531 | 1.606 | 0.778 |
| ebi-a-GCST90001810 | CD38 on CD3- CD19- | MFI | B cell | 17 | 1.060 | 0.833 | 1.350 | 0.634 | 1.278 | 0.828 | 0.555 | 0.285 | 0.984 | 0.707 | 1.368 | 0.923 |
| ebi-a-GCST90001811 | CD38 on IgD+ CD24- B cell | MFI | B cell | 17 | 0.992 | 0.703 | 1.398 | 0.961 | 0.952 | 0.543 | 0.534 | 0.865 | 0.930 | 0.603 | 1.433 | 0.741 |
| ebi-a-GCST90001812 | CD38 on IgD+ CD38+ B cell | MFI | B cell | 16 | 0.973 | 0.748 | 1.265 | 0.839 | 0.964 | 0.624 | 0.419 | 0.871 | 0.994 | 0.703 | 1.406 | 0.973 |
| ebi-a-GCST90001813 | CD38 on IgD+ CD38dim B cell | MFI | B cell | 23 | 0.808 | 0.641 | 1.017 | 0.069 | 0.745 | 0.525 | 0.260 | 0.113 | 0.873 | 0.612 | 1.247 | 0.456 |
| ebi-a-GCST90001814 | CD38 on IgD- CD38+ B cell | MFI | B cell | 14 | 1.043 | 0.949 | 1.147 | 0.386 | 1.108 | 1.000 | 0.114 | 0.074 | 1.058 | 0.935 | 1.198 | 0.371 |
| ebi-a-GCST90001815 | CD38 on IgD- CD38dim B cell | MFI | B cell | 19 | 0.933 | 0.801 | 1.086 | 0.370 | 0.951 | 0.793 | 0.173 | 0.597 | 0.883 | 0.703 | 1.109 | 0.286 |
| ebi-a-GCST90001816 | CD38 on naive-mature B cell | MFI | B cell | 24 | 0.888 | 0.705 | 1.119 | 0.316 | 0.820 | 0.584 | 0.279 | 0.267 | 0.884 | 0.626 | 1.248 | 0.484 |
| ebi-a-GCST90001817 | CD38 on Plasma Blast-Plasma Cell | MFI | B cell | 15 | 1.074 | 0.772 | 1.495 | 0.670 | 0.883 | 0.512 | 0.482 | 0.663 | 0.944 | 0.599 | 1.486 | 0.802 |
| ebi-a-GCST90001818 | CD38 on IgD+ B cell | MFI | B cell | 14 | 0.795 | 0.471 | 1.341 | 0.390 | 1.008 | 0.370 | 1.011 | 0.988 | 0.538 | 0.256 | 1.128 | 0.101 |
| ebi-a-GCST90001819 | CD38 on transitional B cell | MFI | B cell | 22 | 0.848 | 0.676 | 1.065 | 0.157 | 0.946 | 0.673 | 0.323 | 0.753 | 0.925 | 0.656 | 1.303 | 0.655 |
| ebi-a-GCST90001820 | IgD on IgD+ CD24+ B cell | MFI | B cell | 26 | 0.942 | 0.779 | 1.140 | 0.542 | 1.096 | 0.810 | 0.332 | 0.559 | 1.108 | 0.844 | 1.454 | 0.460 |
| ebi-a-GCST90001821 | IgD on IgD+ CD24- B cell | MFI | B cell | 29 | 1.029 | 0.843 | 1.255 | 0.780 | 1.167 | 0.831 | 0.396 | 0.381 | 1.105 | 0.835 | 1.463 | 0.485 |
| ebi-a-GCST90001822 | IgD on IgD+ CD38- B cell | MFI | B cell | 25 | 0.994 | 0.807 | 1.224 | 0.952 | 0.892 | 0.649 | 0.284 | 0.490 | 0.924 | 0.679 | 1.256 | 0.613 |
| ebi-a-GCST90001823 | IgD on IgD+ CD38- unswitched memory B cell | MFI | B cell | 17 | 1.035 | 0.835 | 1.281 | 0.755 | 1.137 | 0.747 | 0.478 | 0.558 | 1.151 | 0.867 | 1.527 | 0.331 |
| ebi-a-GCST90001824 | IgD on IgD+ CD38+ B cell | MFI | B cell | 24 | 1.034 | 0.841 | 1.272 | 0.749 | 1.040 | 0.718 | 0.385 | 0.837 | 1.118 | 0.852 | 1.467 | 0.422 |
| ebi-a-GCST90001825 | IgD on IgD+ CD38dim B cell | MFI | B cell | 22 | 0.977 | 0.823 | 1.161 | 0.795 | 0.938 | 0.724 | 0.243 | 0.632 | 0.928 | 0.721 | 1.194 | 0.559 |
| ebi-a-GCST90001826 | IgD on unswitched memory B cell | MFI | B cell | 21 | 1.017 | 0.841 | 1.231 | 0.861 | 1.106 | 0.841 | 0.302 | 0.479 | 1.053 | 0.812 | 1.367 | 0.695 |
| ebi-a-GCST90001827 | IgD on IgD+ B cell | MFI | B cell | 21 | 0.995 | 0.754 | 1.313 | 0.971 | 0.987 | 0.587 | 0.513 | 0.962 | 1.155 | 0.838 | 1.593 | 0.379 |
| ebi-a-GCST90001828 | IgD on transitional B cell | MFI | B cell | 31 | 1.219 | 0.973 | 1.528 | 0.084 | 0.999 | 0.676 | 0.391 | 0.997 | 1.193 | 0.862 | 1.652 | 0.287 |
| ebi-a-GCST90001829 | BAFF-R on B cell | MFI | B cell | 21 | 1.085 | 0.912 | 1.291 | 0.355 | 1.254 | 1.000 | 0.283 | 0.064 | 1.096 | 0.886 | 1.357 | 0.397 |
| ebi-a-GCST90001830 | BAFF-R on CD20- B cell | MFI | B cell | 13 | 1.278 | 0.941 | 1.734 | 0.116 | 1.209 | 0.769 | 0.546 | 0.428 | 1.340 | 0.891 | 2.015 | 0.160 |
| ebi-a-GCST90001831 | CD62L on CD62L+ myeloid Dendritic Cell | MFI | cDC | 15 | 0.945 | 0.665 | 1.342 | 0.751 | 0.662 | 0.284 | 0.559 | 0.356 | 0.837 | 0.520 | 1.347 | 0.463 |
| ebi-a-GCST90001832 | CD62L on CD62L+ plasmacytoid Dendritic Cell | MFI | cDC | 15 | 1.342 | 0.902 | 1.997 | 0.146 | 1.919 | 1.042 | 1.172 | 0.057 | 0.947 | 0.598 | 1.500 | 0.816 |
| ebi-a-GCST90001833 | CD62L on CD62L+ Dendritic Cell | MFI | cDC | 26 | 1.195 | 0.860 | 1.660 | 0.288 | 1.836 | 1.014 | 1.090 | 0.056 | 1.351 | 0.931 | 1.959 | 0.113 |
| ebi-a-GCST90001834 | CD62L on monocyte | MFI | cDC | 25 | 0.955 | 0.810 | 1.126 | 0.584 | 0.992 | 0.799 | 0.215 | 0.941 | 1.016 | 0.798 | 1.293 | 0.897 |
| ebi-a-GCST90001835 | CD62L on granulocyte | MFI | cDC | 16 | 1.817 | 1.241 | 2.661 | 0.002 | 1.817 | 0.896 | 1.283 | 0.120 | 2.043 | 1.190 | 3.509 | 0.010 |
| ebi-a-GCST90001836 | CD66b on CD66b++ myeloid cell | MFI | Myeloid cell | 25 | 1.067 | 0.888 | 1.283 | 0.489 | 1.192 | 0.899 | 0.336 | 0.235 | 1.158 | 0.880 | 1.525 | 0.294 |
| ebi-a-GCST90001837 | CD66b on Granulocytic Myeloid-Derived Suppressor Cells | MFI | Myeloid cell | 21 | 1.015 | 0.829 | 1.244 | 0.885 | 1.152 | 0.772 | 0.462 | 0.497 | 1.168 | 0.882 | 1.546 | 0.279 |
| ebi-a-GCST90001838 | CD3 on naive CD8+ T cell | MFI | Maturation stages of T cell | 25 | 0.922 | 0.759 | 1.119 | 0.410 | 0.752 | 0.534 | 0.258 | 0.117 | 0.781 | 0.600 | 1.016 | 0.065 |
| ebi-a-GCST90001839 | CD3 on Effector Memory CD8+ T cell | MFI | Maturation stages of T cell | 18 | 0.794 | 0.572 | 1.102 | 0.168 | 0.602 | 0.376 | 0.284 | 0.051 | 0.621 | 0.419 | 0.921 | 0.018 |
| ebi-a-GCST90001840 | CD3 on Terminally Differentiated CD8+ T cell | MFI | Maturation stages of T cell | 21 | 0.942 | 0.722 | 1.229 | 0.660 | 0.903 | 0.499 | 0.536 | 0.740 | 0.897 | 0.614 | 1.310 | 0.574 |
| ebi-a-GCST90001841 | CD3 on Central Memory CD4+ T cell | MFI | Maturation stages of T cell | 22 | 0.966 | 0.786 | 1.188 | 0.744 | 0.865 | 0.648 | 0.250 | 0.337 | 1.046 | 0.783 | 1.396 | 0.761 |
| ebi-a-GCST90001842 | CD3 on Naive CD4+ T cell | MFI | Maturation stages of T cell | 27 | 0.812 | 0.682 | 0.965 | 0.018 | 0.783 | 0.610 | 0.196 | 0.067 | 0.780 | 0.610 | 0.999 | 0.049 |
| ebi-a-GCST90001843 | CD3 on Effector Memory CD4+ T cell | MFI | Maturation stages of T cell | 19 | 0.970 | 0.781 | 1.204 | 0.782 | 0.861 | 0.611 | 0.295 | 0.404 | 0.925 | 0.666 | 1.284 | 0.641 |
| ebi-a-GCST90001844 | CD3 on Terminally Differentiated CD4+ T cell | MFI | Maturation stages of T cell | 21 | 0.826 | 0.664 | 1.028 | 0.087 | 1.011 | 0.746 | 0.307 | 0.943 | 0.858 | 0.630 | 1.167 | 0.328 |
| ebi-a-GCST90001845 | CD3 on CD45RA- CD4+ T cell | MFI | Maturation stages of T cell | 26 | 1.037 | 0.844 | 1.274 | 0.728 | 0.882 | 0.656 | 0.261 | 0.413 | 1.052 | 0.759 | 1.458 | 0.761 |
| ebi-a-GCST90001846 | CD3 on Central Memory CD8+ T cell | MFI | Maturation stages of T cell | 16 | 1.054 | 0.782 | 1.420 | 0.730 | 0.750 | 0.407 | 0.458 | 0.371 | 1.035 | 0.683 | 1.570 | 0.870 |
| ebi-a-GCST90001847 | CD3 on HLA DR+ T cell | MFI | TBNK | 26 | 0.912 | 0.751 | 1.108 | 0.353 | 0.882 | 0.675 | 0.235 | 0.364 | 0.814 | 0.600 | 1.105 | 0.186 |
| ebi-a-GCST90001848 | CD3 on Natural Killer T | MFI | TBNK | 16 | 0.972 | 0.679 | 1.394 | 0.879 | 1.078 | 0.583 | 0.662 | 0.815 | 0.936 | 0.549 | 1.596 | 0.807 |
| ebi-a-GCST90001849 | CD3 on HLA DR+ CD4+ T cell | MFI | TBNK | 25 | 0.878 | 0.675 | 1.142 | 0.331 | 1.309 | 0.828 | 0.599 | 0.261 | 0.741 | 0.512 | 1.074 | 0.113 |
| ebi-a-GCST90001850 | CD3 on HLA DR+ CD8+ T cell | MFI | TBNK | 25 | 0.843 | 0.658 | 1.078 | 0.173 | 0.920 | 0.615 | 0.370 | 0.689 | 0.748 | 0.515 | 1.085 | 0.126 |
| ebi-a-GCST90001851 | CD3 on T cell | MFI | Treg | 29 | 0.932 | 0.802 | 1.082 | 0.352 | 0.869 | 0.709 | 0.177 | 0.188 | 0.872 | 0.705 | 1.078 | 0.205 |
| ebi-a-GCST90001852 | CD3 on CD39+ resting CD4 Treg | MFI | Treg | 20 | 0.903 | 0.723 | 1.128 | 0.370 | 0.908 | 0.654 | 0.298 | 0.572 | 0.877 | 0.631 | 1.219 | 0.434 |
| ebi-a-GCST90001853 | CD3 on activated CD4 Treg | MFI | Treg | 19 | 0.874 | 0.703 | 1.086 | 0.223 | 0.735 | 0.516 | 0.260 | 0.106 | 0.858 | 0.648 | 1.137 | 0.286 |
| ebi-a-GCST90001854 | CD3 on CD39+ activated CD4 Treg | MFI | Treg | 25 | 0.952 | 0.774 | 1.170 | 0.639 | 0.851 | 0.598 | 0.300 | 0.380 | 0.894 | 0.670 | 1.193 | 0.448 |
| ebi-a-GCST90001855 | CD3 on secreting CD4 Treg | MFI | Treg | 20 | 0.899 | 0.737 | 1.098 | 0.298 | 0.902 | 0.658 | 0.284 | 0.530 | 0.742 | 0.562 | 0.978 | 0.034 |
| ebi-a-GCST90001856 | CD3 on CD39+ secreting CD4 Treg | MFI | Treg | 26 | 1.056 | 0.850 | 1.311 | 0.623 | 0.845 | 0.584 | 0.312 | 0.381 | 1.021 | 0.735 | 1.416 | 0.903 |
| ebi-a-GCST90001857 | CD3 on activated & secreting CD4 Treg | MFI | Treg | 20 | 0.921 | 0.747 | 1.134 | 0.437 | 0.892 | 0.637 | 0.300 | 0.515 | 0.889 | 0.668 | 1.182 | 0.417 |
| ebi-a-GCST90001858 | CD3 on CD45RA+ CD4+ T cell | MFI | Treg | 30 | 0.822 | 0.686 | 0.985 | 0.034 | 0.746 | 0.580 | 0.188 | 0.031 | 0.765 | 0.607 | 0.964 | 0.023 |
| ebi-a-GCST90001859 | CD3 on CD8+ T cell | MFI | Treg | 20 | 0.955 | 0.774 | 1.179 | 0.668 | 0.857 | 0.642 | 0.247 | 0.308 | 0.908 | 0.698 | 1.182 | 0.474 |
| ebi-a-GCST90001860 | CD3 on CD39+ CD4+ T cell | MFI | Treg | 27 | 0.908 | 0.764 | 1.079 | 0.273 | 0.691 | 0.522 | 0.194 | 0.016 | 0.759 | 0.587 | 0.982 | 0.036 |
| ebi-a-GCST90001861 | CD3 on CD28+ CD4+ T cell | MFI | Treg | 22 | 0.827 | 0.642 | 1.065 | 0.141 | 0.667 | 0.420 | 0.308 | 0.100 | 0.723 | 0.520 | 1.005 | 0.054 |
| ebi-a-GCST90001862 | CD3 on CD28+ CD4-CD8- T cell | MFI | Treg | 14 | 0.904 | 0.716 | 1.142 | 0.399 | 0.916 | 0.661 | 0.299 | 0.608 | 0.772 | 0.547 | 1.090 | 0.141 |
| ebi-a-GCST90001863 | CD3 on CD28+ CD45RA- CD8+ T cell | MFI | Treg | 17 | 0.871 | 0.655 | 1.158 | 0.342 | 0.699 | 0.364 | 0.457 | 0.300 | 0.795 | 0.530 | 1.190 | 0.264 |
| ebi-a-GCST90001864 | CD3 on CD28+ CD45RA+ CD8+ T cell | MFI | Treg | 24 | 0.966 | 0.766 | 1.218 | 0.767 | 0.890 | 0.563 | 0.407 | 0.622 | 0.797 | 0.583 | 1.088 | 0.153 |
| ebi-a-GCST90001865 | CD3 on CD28- CD8+ T cell | MFI | Treg | 20 | 1.135 | 0.836 | 1.541 | 0.418 | 1.041 | 0.492 | 0.779 | 0.918 | 1.004 | 0.658 | 1.530 | 0.987 |
| ebi-a-GCST90001866 | CD3 on CD39+ CD8+ T cell | MFI | Treg | 15 | 0.792 | 0.558 | 1.123 | 0.191 | 0.419 | 0.189 | 0.335 | 0.053 | 0.801 | 0.500 | 1.283 | 0.356 |
| ebi-a-GCST90001867 | CD3 on CD4+ T cell | MFI | Treg | 28 | 0.981 | 0.791 | 1.218 | 0.865 | 0.846 | 0.610 | 0.277 | 0.327 | 0.884 | 0.641 | 1.218 | 0.451 |
| ebi-a-GCST90001868 | CD3 on CD4 Treg | MFI | Treg | 10 | 0.894 | 0.619 | 1.291 | 0.550 | 0.923 | 0.443 | 0.678 | 0.835 | 0.744 | 0.538 | 1.027 | 0.072 |
| ebi-a-GCST90001869 | CD3 on resting CD4 Treg | MFI | Treg | 36 | 0.987 | 0.800 | 1.219 | 0.906 | 0.955 | 0.682 | 0.322 | 0.791 | 0.927 | 0.651 | 1.321 | 0.676 |
| ebi-a-GCST90001870 | CD34 on Hematopoietic Stem Cell | MFI | Myeloid cell | 12 | 1.055 | 0.902 | 1.234 | 0.504 | 1.106 | 0.880 | 0.254 | 0.409 | 1.050 | 0.860 | 1.282 | 0.631 |
| ebi-a-GCST90001871 | HVEM on T cell | MFI | Maturation stages of T cell | 23 | 0.846 | 0.680 | 1.052 | 0.133 | 1.175 | 0.725 | 0.568 | 0.519 | 0.937 | 0.691 | 1.272 | 0.677 |
| ebi-a-GCST90001872 | HVEM on naive CD8+ T cell | MFI | Maturation stages of T cell | 20 | 1.095 | 0.926 | 1.294 | 0.287 | 1.114 | 0.855 | 0.294 | 0.433 | 1.025 | 0.812 | 1.293 | 0.836 |
| ebi-a-GCST90001873 | HVEM on Effector Memory CD8+ T cell | MFI | Maturation stages of T cell | 18 | 1.055 | 0.857 | 1.299 | 0.615 | 0.867 | 0.592 | 0.331 | 0.476 | 1.044 | 0.783 | 1.392 | 0.771 |
| ebi-a-GCST90001874 | HVEM on Terminally Differentiated CD8+ T cell | MFI | Maturation stages of T cell | 24 | 0.962 | 0.799 | 1.160 | 0.687 | 0.976 | 0.669 | 0.369 | 0.903 | 1.003 | 0.772 | 1.303 | 0.981 |
| ebi-a-GCST90001875 | HVEM on CD4+ T cell | MFI | Maturation stages of T cell | 18 | 0.967 | 0.773 | 1.210 | 0.771 | 0.959 | 0.657 | 0.364 | 0.832 | 1.015 | 0.736 | 1.401 | 0.926 |
| ebi-a-GCST90001876 | HVEM on Central Memory CD4+ T cell | MFI | Maturation stages of T cell | 16 | 1.069 | 0.866 | 1.321 | 0.533 | 1.168 | 0.851 | 0.370 | 0.353 | 1.104 | 0.863 | 1.413 | 0.431 |
| ebi-a-GCST90001877 | HVEM on naive CD4+ T cell | MFI | Maturation stages of T cell | 16 | 0.919 | 0.744 | 1.134 | 0.428 | 1.012 | 0.713 | 0.354 | 0.950 | 0.991 | 0.729 | 1.348 | 0.956 |
| ebi-a-GCST90001878 | HVEM on Effector Memory CD4+ T cell | MFI | Maturation stages of T cell | 20 | 1.169 | 0.912 | 1.498 | 0.217 | 1.121 | 0.579 | 0.741 | 0.738 | 1.217 | 0.879 | 1.685 | 0.238 |
| ebi-a-GCST90001879 | HVEM on Terminally Differentiated CD4+ T cell | MFI | Maturation stages of T cell | 26 | 1.023 | 0.836 | 1.251 | 0.826 | 0.955 | 0.664 | 0.348 | 0.807 | 1.134 | 0.858 | 1.498 | 0.377 |
| ebi-a-GCST90001880 | HVEM on CD45RA- CD4+ T cell | MFI | Maturation stages of T cell | 18 | 0.936 | 0.730 | 1.199 | 0.599 | 0.728 | 0.462 | 0.330 | 0.189 | 0.752 | 0.546 | 1.035 | 0.080 |
| ebi-a-GCST90001881 | HVEM on CD8+ T cell | MFI | Maturation stages of T cell | 15 | 0.935 | 0.701 | 1.248 | 0.648 | 0.590 | 0.308 | 0.385 | 0.137 | 0.924 | 0.634 | 1.346 | 0.679 |
| ebi-a-GCST90001882 | HVEM on Central Memory CD8+ T cell | MFI | Maturation stages of T cell | 17 | 0.889 | 0.716 | 1.105 | 0.289 | 0.992 | 0.677 | 0.379 | 0.970 | 0.956 | 0.748 | 1.221 | 0.717 |
| ebi-a-GCST90001883 | CD16-CD56 on Natural Killer T | MFI | TBNK | 27 | 0.973 | 0.781 | 1.211 | 0.804 | 0.998 | 0.701 | 0.352 | 0.991 | 0.865 | 0.615 | 1.218 | 0.407 |
| ebi-a-GCST90001884 | CD16-CD56 on Natural Killer | MFI | TBNK | 28 | 1.093 | 0.881 | 1.355 | 0.418 | 0.990 | 0.637 | 0.437 | 0.964 | 1.042 | 0.757 | 1.435 | 0.799 |
| ebi-a-GCST90001885 | CD16-CD56 on HLA DR+ Natural Killer | MFI | TBNK | 24 | 1.051 | 0.909 | 1.216 | 0.501 | 1.054 | 0.876 | 0.195 | 0.582 | 0.930 | 0.755 | 1.146 | 0.497 |
| ebi-a-GCST90001886 | CD28 on CD39+ activated CD4 Treg | MFI | Treg | 18 | 0.853 | 0.686 | 1.060 | 0.151 | 0.863 | 0.632 | 0.269 | 0.369 | 0.978 | 0.726 | 1.319 | 0.885 |
| ebi-a-GCST90001887 | CD28 on secreting CD4 Treg | MFI | Treg | 15 | 0.970 | 0.811 | 1.159 | 0.735 | 0.946 | 0.757 | 0.211 | 0.631 | 1.060 | 0.827 | 1.359 | 0.646 |
| ebi-a-GCST90001888 | CD28 on CD39+ secreting CD4 Treg | MFI | Treg | 21 | 1.088 | 0.862 | 1.372 | 0.478 | 1.011 | 0.726 | 0.336 | 0.949 | 1.060 | 0.789 | 1.423 | 0.700 |
| ebi-a-GCST90001889 | CD28 on activated & secreting CD4 Treg | MFI | Treg | 22 | 0.983 | 0.811 | 1.191 | 0.860 | 1.006 | 0.786 | 0.248 | 0.963 | 0.983 | 0.773 | 1.250 | 0.891 |
| ebi-a-GCST90001890 | CD28 on CD45RA+ CD4+ T cell | MFI | Treg | 13 | 0.780 | 0.561 | 1.085 | 0.140 | 0.784 | 0.409 | 0.511 | 0.480 | 0.728 | 0.459 | 1.153 | 0.176 |
| ebi-a-GCST90001891 | CD28 on CD45RA- CD4 not Treg | MFI | Treg | 13 | 0.981 | 0.708 | 1.360 | 0.908 | 1.205 | 0.608 | 0.823 | 0.604 | 0.774 | 0.494 | 1.213 | 0.264 |
| ebi-a-GCST90001892 | CD28 on CD39+ CD4+ T cell | MFI | Treg | 15 | 1.127 | 0.848 | 1.499 | 0.410 | 1.099 | 0.666 | 0.551 | 0.717 | 1.003 | 0.742 | 1.357 | 0.982 |
| ebi-a-GCST90001893 | CD28 on CD28+ CD45RA- CD8+ T cell | MFI | Treg | 17 | 1.063 | 0.721 | 1.566 | 0.758 | 1.453 | 0.667 | 1.132 | 0.362 | 0.936 | 0.539 | 1.624 | 0.814 |
| ebi-a-GCST90001894 | CD28 on CD28+ CD4+ T cell | MFI | Treg | 26 | 0.952 | 0.780 | 1.162 | 0.628 | 0.968 | 0.729 | 0.274 | 0.824 | 0.996 | 0.764 | 1.298 | 0.974 |
| ebi-a-GCST90001895 | CD28 on CD28+ CD4-CD8- T cell | MFI | Treg | 3 | 1.376 | 0.203 | 9.305 | 0.743 | 11.383 | 0.000 | ##### | 0.726 | 0.796 | 0.164 | 3.852 | 0.776 |
| ebi-a-GCST90001896 | CD28 on CD28+ CD45RA+ CD8+ T cell | MFI | Treg | 15 | 1.093 | 0.863 | 1.384 | 0.460 | 1.056 | 0.740 | 0.376 | 0.768 | 1.005 | 0.728 | 1.386 | 0.977 |
| ebi-a-GCST90001897 | CD28 on CD39+ CD8+ T cell | MFI | Treg | 19 | 1.019 | 0.867 | 1.198 | 0.819 | 1.081 | 0.893 | 0.207 | 0.434 | 1.027 | 0.839 | 1.258 | 0.796 |
| ebi-a-GCST90001898 | CD28 on CD4+ T cell | MFI | Treg | 24 | 0.896 | 0.703 | 1.142 | 0.376 | 0.828 | 0.576 | 0.301 | 0.320 | 0.874 | 0.642 | 1.190 | 0.393 |
| ebi-a-GCST90001899 | CD28 on CD4 Treg | MFI | Treg | 24 | 0.956 | 0.828 | 1.105 | 0.544 | 1.013 | 0.852 | 0.175 | 0.887 | 0.977 | 0.799 | 1.196 | 0.825 |
| ebi-a-GCST90001900 | CD28 on resting CD4 Treg | MFI | Treg | 6 | 0.701 | 0.448 | 1.096 | 0.119 | 1.116 | 0.497 | 0.903 | 0.803 | 0.708 | 0.417 | 1.204 | 0.203 |
| ebi-a-GCST90001901 | CD28 on CD39+ resting CD4 Treg | MFI | Treg | 21 | 1.166 | 1.014 | 1.341 | 0.031 | 1.144 | 0.976 | 0.182 | 0.114 | 1.219 | 0.991 | 1.499 | 0.060 |
| ebi-a-GCST90001902 | CD28 on activated CD4 Treg | MFI | Treg | 18 | 0.955 | 0.714 | 1.276 | 0.754 | 1.239 | 0.853 | 0.462 | 0.277 | 1.012 | 0.720 | 1.421 | 0.946 |
| ebi-a-GCST90001903 | CD86 on myeloid Dendritic Cell | MFI | cDC | 19 | 0.875 | 0.643 | 1.191 | 0.396 | 0.933 | 0.510 | 0.562 | 0.823 | 0.938 | 0.612 | 1.439 | 0.771 |
| ebi-a-GCST90001904 | CD86 on CD62L+ myeloid Dendritic Cell | MFI | cDC | 21 | 0.991 | 0.784 | 1.253 | 0.943 | 1.058 | 0.754 | 0.359 | 0.747 | 1.082 | 0.774 | 1.512 | 0.645 |
| ebi-a-GCST90001905 | CD86 on monocyte | MFI | cDC | 16 | 1.078 | 0.843 | 1.379 | 0.550 | 1.235 | 0.877 | 0.422 | 0.246 | 1.286 | 0.925 | 1.788 | 0.135 |
| ebi-a-GCST90001906 | CD86 on granulocyte | MFI | cDC | 20 | 0.922 | 0.675 | 1.260 | 0.612 | 0.697 | 0.401 | 0.384 | 0.215 | 0.964 | 0.622 | 1.495 | 0.870 |
| ebi-a-GCST90001907 | CCR7 on naive CD4+ T cell | MFI | Maturation stages of T cell | 22 | 0.913 | 0.770 | 1.082 | 0.293 | 0.954 | 0.766 | 0.210 | 0.679 | 0.914 | 0.728 | 1.147 | 0.438 |
| ebi-a-GCST90001908 | CCR7 on naive CD8+ T cell | MFI | Maturation stages of T cell | 24 | 0.837 | 0.659 | 1.063 | 0.144 | 0.892 | 0.605 | 0.345 | 0.567 | 0.783 | 0.561 | 1.092 | 0.149 |
| ebi-a-GCST90001909 | CD45 on CD14+ monocyte | MFI | TBNK | 16 | 1.009 | 0.744 | 1.370 | 0.952 | 1.035 | 0.652 | 0.478 | 0.886 | 1.022 | 0.688 | 1.516 | 0.915 |
| ebi-a-GCST90001910 | CD45 on B cell | MFI | TBNK | 14 | 1.098 | 0.927 | 1.300 | 0.281 | 1.098 | 0.900 | 0.218 | 0.376 | 1.083 | 0.869 | 1.351 | 0.478 |
| ebi-a-GCST90001911 | CD45 on Natural Killer | MFI | TBNK | 27 | 0.986 | 0.785 | 1.240 | 0.906 | 0.894 | 0.637 | 0.303 | 0.522 | 0.834 | 0.587 | 1.186 | 0.312 |
| ebi-a-GCST90001912 | CD45 on HLA DR+ Natural Killer | MFI | TBNK | 12 | 0.937 | 0.643 | 1.365 | 0.733 | 0.663 | 0.367 | 0.392 | 0.203 | 0.901 | 0.527 | 1.541 | 0.704 |
| ebi-a-GCST90001913 | CD45 on granulocyte | MFI | TBNK | 15 | 1.246 | 0.999 | 1.554 | 0.051 | 1.374 | 1.033 | 0.392 | 0.048 | 1.381 | 0.974 | 1.958 | 0.070 |
| ebi-a-GCST90001914 | CD45 on lymphocyte | MFI | TBNK | 24 | 0.958 | 0.741 | 1.238 | 0.743 | 0.871 | 0.591 | 0.338 | 0.492 | 1.056 | 0.717 | 1.555 | 0.782 |
| ebi-a-GCST90001915 | CD45 on T cell | MFI | TBNK | 15 | 0.899 | 0.700 | 1.154 | 0.404 | 0.777 | 0.558 | 0.257 | 0.160 | 0.884 | 0.639 | 1.222 | 0.455 |
| ebi-a-GCST90001916 | CD45 on CD4+ T cell | MFI | TBNK | 13 | 1.287 | 0.835 | 1.984 | 0.253 | 1.711 | 0.606 | 1.775 | 0.332 | 1.191 | 0.669 | 2.120 | 0.553 |
| ebi-a-GCST90001917 | CD45 on CD8+ T cell | MFI | TBNK | 25 | 1.028 | 0.964 | 1.096 | 0.400 | 1.020 | 0.951 | 0.072 | 0.581 | 1.048 | 0.962 | 1.142 | 0.285 |
| ebi-a-GCST90001918 | CD45 on HLA DR+ T cell | MFI | TBNK | 18 | 1.050 | 0.830 | 1.330 | 0.682 | 1.102 | 0.779 | 0.381 | 0.591 | 1.102 | 0.819 | 1.482 | 0.523 |
| ebi-a-GCST90001919 | CD45 on Natural Killer T | MFI | TBNK | 22 | 1.009 | 0.823 | 1.236 | 0.933 | 0.977 | 0.714 | 0.306 | 0.884 | 0.980 | 0.745 | 1.290 | 0.887 |
| ebi-a-GCST90001920 | CD45 on HLA DR+ CD4+ T cell | MFI | TBNK | 17 | 0.922 | 0.734 | 1.158 | 0.487 | 0.865 | 0.650 | 0.247 | 0.335 | 0.882 | 0.643 | 1.209 | 0.435 |
| ebi-a-GCST90001921 | CD45 on HLA DR+ CD8+ T cell | MFI | TBNK | 17 | 1.130 | 0.915 | 1.397 | 0.256 | 1.101 | 0.837 | 0.301 | 0.502 | 1.138 | 0.833 | 1.555 | 0.417 |
| ebi-a-GCST90001922 | CD127 on T cell | MFI | Treg | 18 | 1.511 | 1.042 | 2.190 | 0.029 | 1.131 | 0.426 | 1.106 | 0.808 | 1.761 | 1.034 | 2.999 | 0.037 |
| ebi-a-GCST90001923 | CD127 on CD45RA- CD4 not Treg | MFI | Treg | 15 | 1.054 | 0.842 | 1.320 | 0.645 | 0.991 | 0.746 | 0.282 | 0.950 | 1.010 | 0.746 | 1.366 | 0.950 |
| ebi-a-GCST90001924 | CD127 on CD28+ CD4+ T cell | MFI | Treg | 18 | 1.108 | 0.861 | 1.425 | 0.426 | 0.878 | 0.624 | 0.301 | 0.468 | 1.009 | 0.726 | 1.401 | 0.958 |
| ebi-a-GCST90001925 | CD127 on CD28+ CD4-CD8- T cell | MFI | Treg | 22 | 0.894 | 0.657 | 1.218 | 0.478 | 0.835 | 0.465 | 0.490 | 0.554 | 0.960 | 0.610 | 1.510 | 0.859 |
| ebi-a-GCST90001926 | CD127 on granulocyte | MFI | Treg | 31 | 0.898 | 0.715 | 1.126 | 0.351 | 0.772 | 0.538 | 0.280 | 0.173 | 0.766 | 0.554 | 1.060 | 0.108 |
| ebi-a-GCST90001927 | CD127 on CD8+ T cell | MFI | Treg | 23 | 1.063 | 0.792 | 1.427 | 0.684 | 0.819 | 0.469 | 0.457 | 0.492 | 0.923 | 0.595 | 1.432 | 0.720 |
| ebi-a-GCST90001928 | CD127 on CD28+ CD45RA- CD8+ T cell | MFI | Treg | 17 | 0.975 | 0.765 | 1.244 | 0.841 | 0.841 | 0.608 | 0.272 | 0.311 | 0.792 | 0.585 | 1.073 | 0.132 |
| ebi-a-GCST90001929 | CD127 on CD28+ CD45RA+ CD8+ T cell | MFI | Treg | 20 | 1.180 | 0.874 | 1.592 | 0.281 | 1.355 | 0.765 | 0.774 | 0.311 | 1.067 | 0.679 | 1.678 | 0.778 |
| ebi-a-GCST90001930 | CD127 on CD28- CD8+ T cell | MFI | Treg | 18 | 1.008 | 0.769 | 1.322 | 0.952 | 0.805 | 0.529 | 0.338 | 0.327 | 1.125 | 0.767 | 1.650 | 0.548 |
| ebi-a-GCST90001931 | CD127 on CD4+ T cell | MFI | Treg | 8 | 1.666 | 1.030 | 2.695 | 0.037 | 2.146 | 0.578 | 2.814 | 0.297 | 1.993 | 1.048 | 3.790 | 0.036 |
| ebi-a-GCST90001932 | CD127 on CD45RA+ CD4+ T cell | MFI | Treg | 19 | 1.138 | 0.855 | 1.513 | 0.375 | 1.533 | 0.865 | 0.879 | 0.162 | 1.051 | 0.701 | 1.577 | 0.810 |
| ebi-a-GCST90001933 | CD25 on CD45RA- CD4 not Treg | MFI | Treg | 26 | 1.011 | 0.852 | 1.200 | 0.900 | 0.906 | 0.732 | 0.194 | 0.375 | 0.923 | 0.725 | 1.174 | 0.513 |
| ebi-a-GCST90001934 | CD25 on CD45RA+ CD4 not Treg | MFI | Treg | 22 | 0.974 | 0.831 | 1.143 | 0.750 | 1.036 | 0.854 | 0.199 | 0.725 | 1.018 | 0.822 | 1.262 | 0.868 |
| ebi-a-GCST90001935 | CD25 on CD39+ CD4 Treg | MFI | Treg | 17 | 0.902 | 0.664 | 1.226 | 0.511 | 0.912 | 0.533 | 0.490 | 0.741 | 1.008 | 0.650 | 1.562 | 0.972 |
| ebi-a-GCST90001936 | CD25 on CD4 Treg | MFI | Treg | 21 | 1.048 | 0.911 | 1.205 | 0.514 | 0.974 | 0.828 | 0.158 | 0.751 | 0.998 | 0.815 | 1.223 | 0.987 |
| ebi-a-GCST90001937 | CD25 on resting CD4 Treg | MFI | Treg | 20 | 1.006 | 0.740 | 1.368 | 0.969 | 0.856 | 0.562 | 0.360 | 0.477 | 0.774 | 0.528 | 1.136 | 0.190 |
| ebi-a-GCST90001938 | CD25 on CD39+ resting CD4 Treg | MFI | Treg | 15 | 0.843 | 0.466 | 1.524 | 0.572 | 0.798 | 0.264 | 0.884 | 0.697 | 1.023 | 0.532 | 1.969 | 0.945 |
| ebi-a-GCST90001939 | CD25 on activated CD4 Treg | MFI | Treg | 17 | 0.861 | 0.559 | 1.325 | 0.496 | 0.506 | 0.223 | 0.416 | 0.125 | 0.945 | 0.517 | 1.727 | 0.853 |
| ebi-a-GCST90001940 | CD25 on CD39+ activated CD4 Treg | MFI | Treg | 12 | 1.155 | 0.869 | 1.536 | 0.321 | 1.163 | 0.809 | 0.423 | 0.434 | 1.078 | 0.774 | 1.503 | 0.656 |
| ebi-a-GCST90001941 | CD25 on secreting CD4 Treg | MFI | Treg | 13 | 1.201 | 1.039 | 1.388 | 0.013 | 1.226 | 1.032 | 0.212 | 0.041 | 1.268 | 1.037 | 1.551 | 0.021 |
| ebi-a-GCST90001942 | CD25 on CD39+ secreting CD4 Treg | MFI | Treg | 15 | 1.006 | 0.860 | 1.176 | 0.944 | 1.009 | 0.842 | 0.183 | 0.922 | 0.987 | 0.811 | 1.201 | 0.896 |
| ebi-a-GCST90001943 | CD25 on activated & secreting CD4 Treg | MFI | Treg | 20 | 1.104 | 0.961 | 1.268 | 0.161 | 1.058 | 0.898 | 0.174 | 0.508 | 1.078 | 0.891 | 1.305 | 0.439 |
| ebi-a-GCST90001944 | CD123 on plasmacytoid Dendritic Cell | MFI | cDC | 18 | 1.028 | 0.916 | 1.153 | 0.642 | 1.004 | 0.878 | 0.135 | 0.956 | 1.082 | 0.907 | 1.291 | 0.381 |
| ebi-a-GCST90001945 | CD123 on CD62L+ plasmacytoid Dendritic Cell | MFI | cDC | 18 | 1.028 | 0.916 | 1.153 | 0.637 | 1.004 | 0.878 | 0.135 | 0.950 | 1.082 | 0.907 | 1.291 | 0.383 |
| ebi-a-GCST90001946 | CD33 on CD14+ monocyte | MFI | Myeloid cell | 20 | 0.946 | 0.819 | 1.093 | 0.454 | 1.140 | 0.909 | 0.258 | 0.271 | 0.960 | 0.805 | 1.146 | 0.655 |
| ebi-a-GCST90001947 | CD33 on CD33+ HLA DR+ CD14dim | MFI | Myeloid cell | 27 | 1.007 | 0.892 | 1.137 | 0.912 | 1.059 | 0.876 | 0.201 | 0.558 | 0.965 | 0.825 | 1.128 | 0.654 |
| ebi-a-GCST90001948 | CD33 on CD33dim HLA DR+ CD11b+ | MFI | Myeloid cell | 21 | 0.854 | 0.737 | 0.989 | 0.035 | 1.072 | 0.847 | 0.252 | 0.570 | 0.950 | 0.797 | 1.134 | 0.572 |
| ebi-a-GCST90001949 | CD33 on CD33dim HLA DR+ CD11b- | MFI | Myeloid cell | 21 | 0.859 | 0.741 | 0.995 | 0.042 | 1.070 | 0.841 | 0.257 | 0.587 | 0.936 | 0.784 | 1.118 | 0.467 |
| ebi-a-GCST90001950 | CD33 on Granulocytic Myeloid-Derived Suppressor Cells | MFI | Myeloid cell | 20 | 0.921 | 0.788 | 1.078 | 0.306 | 0.805 | 0.601 | 0.236 | 0.165 | 0.932 | 0.752 | 1.154 | 0.516 |
| ebi-a-GCST90001951 | CD33 on CD66b++ myeloid cell | MFI | Myeloid cell | 18 | 0.921 | 0.791 | 1.073 | 0.291 | 1.047 | 0.788 | 0.298 | 0.754 | 0.954 | 0.785 | 1.158 | 0.632 |
| ebi-a-GCST90001952 | CD33 on Monocytic Myeloid-Derived Suppressor Cells | MFI | Myeloid cell | 21 | 0.991 | 0.861 | 1.142 | 0.903 | 1.006 | 0.808 | 0.220 | 0.960 | 0.963 | 0.812 | 1.142 | 0.665 |
| ebi-a-GCST90001953 | CD33 on CD33dim HLA DR- | MFI | Myeloid cell | 19 | 0.893 | 0.773 | 1.031 | 0.123 | 0.933 | 0.740 | 0.216 | 0.564 | 0.952 | 0.800 | 1.134 | 0.584 |
| ebi-a-GCST90001954 | CD33 on basophil | MFI | Myeloid cell | 22 | 0.922 | 0.829 | 1.025 | 0.133 | 0.938 | 0.811 | 0.136 | 0.399 | 0.954 | 0.828 | 1.098 | 0.512 |
| ebi-a-GCST90001955 | CD33 on Immature Myeloid-Derived Suppressor Cells | MFI | Myeloid cell | 22 | 0.940 | 0.799 | 1.106 | 0.455 | 1.004 | 0.774 | 0.261 | 0.977 | 0.938 | 0.788 | 1.116 | 0.471 |
| ebi-a-GCST90001956 | CD33 on CD33+ HLA DR+ | MFI | Myeloid cell | 23 | 0.926 | 0.801 | 1.072 | 0.304 | 1.178 | 0.967 | 0.232 | 0.118 | 0.964 | 0.825 | 1.127 | 0.649 |
| ebi-a-GCST90001957 | CD33 on CD33+ HLA DR+ CD14- | MFI | Myeloid cell | 21 | 0.917 | 0.791 | 1.063 | 0.250 | 1.162 | 0.939 | 0.247 | 0.183 | 0.964 | 0.818 | 1.137 | 0.665 |
| ebi-a-GCST90001958 | CD4 on monocyte | MFI | TBNK | 14 | 0.869 | 0.647 | 1.168 | 0.351 | 1.095 | 0.718 | 0.461 | 0.681 | 0.939 | 0.619 | 1.423 | 0.766 |
| ebi-a-GCST90001959 | CD4 on HLA DR+ CD4+ T cell | MFI | TBNK | 20 | 0.955 | 0.700 | 1.303 | 0.770 | 1.209 | 0.653 | 0.744 | 0.553 | 0.857 | 0.561 | 1.309 | 0.475 |
| ebi-a-GCST90001960 | CD25 on CD4+ T cell | MFI | Treg | 15 | 1.082 | 0.941 | 1.244 | 0.267 | 1.045 | 0.889 | 0.170 | 0.603 | 1.056 | 0.899 | 1.240 | 0.508 |
| ebi-a-GCST90001961 | CD25 on CD39+ CD4+ T cell | MFI | Treg | 23 | 1.109 | 0.911 | 1.350 | 0.302 | 0.953 | 0.708 | 0.283 | 0.753 | 1.085 | 0.849 | 1.387 | 0.514 |
| ebi-a-GCST90001962 | CD25 on CD28+ CD4+ T cell | MFI | Treg | 5 | 0.633 | 0.330 | 1.214 | 0.168 | 0.706 | 0.130 | 1.194 | 0.714 | 0.906 | 0.401 | 2.048 | 0.812 |
| ebi-a-GCST90001963 | FSC-A on myeloid Dendritic Cell | Morphological parameter | cDC | 20 | 0.988 | 0.858 | 1.137 | 0.863 | 0.944 | 0.792 | 0.166 | 0.531 | 1.008 | 0.830 | 1.225 | 0.934 |
| ebi-a-GCST90001964 | FSC-A on plasmacytoid Dendritic Cell | Morphological parameter | cDC | 26 | 0.915 | 0.805 | 1.040 | 0.175 | 0.976 | 0.825 | 0.164 | 0.781 | 0.887 | 0.729 | 1.080 | 0.232 |
| ebi-a-GCST90001965 | FSC-A on monocyte | Morphological parameter | cDC | 19 | 1.015 | 0.836 | 1.232 | 0.883 | 1.045 | 0.826 | 0.246 | 0.716 | 1.016 | 0.805 | 1.283 | 0.892 |
| ebi-a-GCST90001966 | FSC-A on granulocyte | Morphological parameter | cDC | 20 | 0.977 | 0.764 | 1.248 | 0.851 | 1.187 | 0.822 | 0.436 | 0.372 | 1.183 | 0.852 | 1.641 | 0.315 |
| ebi-a-GCST90001967 | FSC-A on CD14+ monocyte | Morphological parameter | TBNK | 23 | 1.035 | 0.807 | 1.327 | 0.789 | 1.067 | 0.750 | 0.376 | 0.722 | 1.144 | 0.812 | 1.612 | 0.442 |
| ebi-a-GCST90001968 | FSC-A on B cell | Morphological parameter | TBNK | 19 | 0.998 | 0.736 | 1.355 | 0.992 | 0.883 | 0.501 | 0.500 | 0.672 | 0.780 | 0.504 | 1.208 | 0.266 |
| ebi-a-GCST90001969 | FSC-A on Natural Killer | Morphological parameter | TBNK | 18 | 0.765 | 0.590 | 0.992 | 0.043 | 0.765 | 0.512 | 0.308 | 0.211 | 0.800 | 0.550 | 1.163 | 0.242 |
| ebi-a-GCST90001970 | FSC-A on HLA DR+ Natural Killer | Morphological parameter | TBNK | 20 | 1.089 | 0.910 | 1.303 | 0.350 | 1.215 | 0.948 | 0.302 | 0.142 | 1.144 | 0.903 | 1.449 | 0.264 |
| ebi-a-GCST90001971 | FSC-A on lymphocyte | Morphological parameter | TBNK | 16 | 1.133 | 0.898 | 1.429 | 0.293 | 1.229 | 0.932 | 0.340 | 0.165 | 1.178 | 0.864 | 1.605 | 0.301 |
| ebi-a-GCST90001972 | FSC-A on T cell | Morphological parameter | TBNK | 21 | 1.104 | 0.917 | 1.330 | 0.294 | 1.131 | 0.893 | 0.268 | 0.320 | 1.151 | 0.916 | 1.447 | 0.227 |
| ebi-a-GCST90001973 | FSC-A on CD4+ T cell | Morphological parameter | TBNK | 23 | 1.168 | 0.995 | 1.372 | 0.058 | 1.263 | 1.042 | 0.243 | 0.027 | 1.227 | 0.989 | 1.523 | 0.063 |
| ebi-a-GCST90001974 | FSC-A on CD8+ T cell | Morphological parameter | TBNK | 18 | 1.038 | 0.759 | 1.420 | 0.815 | 1.126 | 0.734 | 0.482 | 0.594 | 1.091 | 0.750 | 1.586 | 0.650 |
| ebi-a-GCST90001975 | FSC-A on HLA DR+ T cell | Morphological parameter | TBNK | 18 | 1.008 | 0.859 | 1.183 | 0.918 | 0.988 | 0.822 | 0.181 | 0.899 | 0.982 | 0.839 | 1.149 | 0.820 |
| ebi-a-GCST90001976 | FSC-A on Natural Killer T | Morphological parameter | TBNK | 20 | 0.985 | 0.707 | 1.372 | 0.929 | 0.920 | 0.519 | 0.526 | 0.777 | 0.905 | 0.562 | 1.458 | 0.683 |
| ebi-a-GCST90001977 | FSC-A on HLA DR+ CD4+ T cell | Morphological parameter | TBNK | 17 | 1.022 | 0.801 | 1.303 | 0.863 | 1.112 | 0.813 | 0.348 | 0.517 | 1.000 | 0.726 | 1.378 | 0.999 |
| ebi-a-GCST90001978 | FSC-A on HLA DR+ CD8+ T cell | Morphological parameter | TBNK | 16 | 1.179 | 0.999 | 1.390 | 0.051 | 1.135 | 0.929 | 0.228 | 0.235 | 1.189 | 0.965 | 1.464 | 0.103 |
| ebi-a-GCST90001979 | CD16 on CD14- CD16+ monocyte | MFI | Monocyte | 20 | 1.015 | 0.846 | 1.218 | 0.875 | 0.869 | 0.677 | 0.217 | 0.283 | 1.001 | 0.786 | 1.275 | 0.992 |
| ebi-a-GCST90001980 | CD40 on CD14+ CD16- monocyte | MFI | Monocyte | 22 | 1.138 | 0.892 | 1.452 | 0.299 | 1.206 | 0.802 | 0.492 | 0.378 | 1.163 | 0.814 | 1.661 | 0.408 |
| ebi-a-GCST90001981 | CD40 on CD14+ CD16+ monocyte | MFI | Monocyte | 19 | 0.965 | 0.821 | 1.135 | 0.668 | 1.068 | 0.833 | 0.266 | 0.610 | 1.006 | 0.811 | 1.247 | 0.958 |
| ebi-a-GCST90001982 | CCR2 on CD14- CD16+ monocyte | MFI | Monocyte | 27 | 1.051 | 0.906 | 1.219 | 0.514 | 0.992 | 0.828 | 0.179 | 0.929 | 1.064 | 0.858 | 1.320 | 0.571 |
| ebi-a-GCST90001983 | CD14 on CD14+ CD16+ monocyte | MFI | Monocyte | 15 | 0.923 | 0.616 | 1.384 | 0.699 | 0.624 | 0.196 | 0.723 | 0.439 | 1.029 | 0.601 | 1.763 | 0.916 |
| ebi-a-GCST90001984 | HLA DR on CD14- CD16+ monocyte | MFI | Monocyte | 19 | 1.012 | 0.781 | 1.313 | 0.926 | 1.024 | 0.597 | 0.553 | 0.931 | 1.064 | 0.770 | 1.469 | 0.708 |
| ebi-a-GCST90001985 | CD40 on monocytes | MFI | Monocyte | 28 | 1.015 | 0.906 | 1.137 | 0.798 | 1.040 | 0.903 | 0.147 | 0.590 | 1.024 | 0.866 | 1.211 | 0.779 |
| ebi-a-GCST90001986 | CD14 on CD14+ CD16- monocyte | MFI | Monocyte | 16 | 0.813 | 0.565 | 1.168 | 0.263 | 1.095 | 0.585 | 0.687 | 0.781 | 1.024 | 0.601 | 1.747 | 0.929 |
| ebi-a-GCST90001987 | CD64 on CD14+ CD16- monocyte | MFI | Monocyte | 33 | 1.088 | 1.012 | 1.169 | 0.022 | 1.089 | 1.004 | 0.088 | 0.047 | 1.129 | 1.002 | 1.272 | 0.047 |
| ebi-a-GCST90001988 | HLA DR on CD14+ CD16- monocyte | MFI | Monocyte | 21 | 1.194 | 0.897 | 1.589 | 0.225 | 0.907 | 0.540 | 0.471 | 0.716 | 1.090 | 0.798 | 1.489 | 0.588 |
| ebi-a-GCST90001989 | CD40 on CD14- CD16+ monocyte | MFI | Monocyte | 26 | 0.954 | 0.813 | 1.119 | 0.561 | 0.766 | 0.615 | 0.167 | 0.025 | 0.858 | 0.685 | 1.074 | 0.182 |
| ebi-a-GCST90001990 | CD64 on CD14- CD16+ monocyte | MFI | Monocyte | 19 | 1.137 | 0.727 | 1.780 | 0.573 | 0.814 | 0.368 | 0.646 | 0.617 | 1.104 | 0.657 | 1.857 | 0.708 |
| ebi-a-GCST90001991 | HLA DR on CD14+ monocyte | MFI | Monocyte | 20 | 1.219 | 0.921 | 1.614 | 0.166 | 0.914 | 0.548 | 0.467 | 0.734 | 1.093 | 0.794 | 1.504 | 0.585 |
| ebi-a-GCST90001992 | CCR2 on CD14+ CD16+ monocyte | MFI | Monocyte | 36 | 0.959 | 0.844 | 1.089 | 0.515 | 1.064 | 0.916 | 0.159 | 0.424 | 0.933 | 0.776 | 1.121 | 0.458 |
| ebi-a-GCST90001993 | PDL-1 on CD14+ CD16- monocyte | MFI | Monocyte | 15 | 0.934 | 0.616 | 1.417 | 0.749 | 0.732 | 0.380 | 0.480 | 0.368 | 1.062 | 0.587 | 1.923 | 0.842 |
| ebi-a-GCST90001994 | CX3CR1 on CD14- CD16- | MFI | Monocyte | 19 | 1.000 | 0.873 | 1.146 | 0.998 | 0.998 | 0.838 | 0.174 | 0.978 | 0.936 | 0.779 | 1.124 | 0.480 |
| ebi-a-GCST90001995 | CX3CR1 on monocyte | MFI | Monocyte | 26 | 1.016 | 0.788 | 1.310 | 0.902 | 1.048 | 0.615 | 0.560 | 0.864 | 0.909 | 0.620 | 1.333 | 0.625 |
| ebi-a-GCST90001996 | CX3CR1 on CD14+ CD16+ monocyte | MFI | Monocyte | 33 | 1.019 | 0.853 | 1.216 | 0.840 | 1.250 | 0.961 | 0.328 | 0.106 | 1.104 | 0.849 | 1.435 | 0.460 |
| ebi-a-GCST90001997 | CX3CR1 on CD14+ CD16- monocyte | MFI | Monocyte | 27 | 0.892 | 0.717 | 1.111 | 0.307 | 0.779 | 0.514 | 0.324 | 0.249 | 0.863 | 0.626 | 1.190 | 0.368 |
| ebi-a-GCST90001998 | PDL-1 on CD14+ CD16+ monocyte | MFI | Monocyte | 27 | 1.048 | 0.865 | 1.270 | 0.633 | 1.234 | 0.950 | 0.323 | 0.127 | 1.172 | 0.879 | 1.562 | 0.280 |
| ebi-a-GCST90001999 | PDL-1 on CD14- CD16+ monocyte | MFI | Monocyte | 18 | 1.007 | 0.713 | 1.421 | 0.969 | 1.152 | 0.584 | 0.784 | 0.688 | 1.029 | 0.693 | 1.528 | 0.887 |
| ebi-a-GCST90002000 | PDL-1 on CD14- CD16- | MFI | Monocyte | 25 | 0.901 | 0.712 | 1.140 | 0.386 | 0.939 | 0.687 | 0.293 | 0.694 | 1.112 | 0.782 | 1.581 | 0.556 |
| ebi-a-GCST90002001 | CD64 on CD14- CD16- | MFI | Monocyte | 16 | 1.397 | 0.985 | 1.982 | 0.060 | 2.831 | 1.389 | 2.017 | 0.012 | 1.210 | 0.727 | 2.013 | 0.464 |
| ebi-a-GCST90002002 | PDL-1 on monocyte | MFI | Monocyte | 15 | 0.983 | 0.691 | 1.399 | 0.924 | 1.409 | 0.766 | 0.858 | 0.290 | 1.014 | 0.626 | 1.643 | 0.955 |
| ebi-a-GCST90002003 | CCR2 on CD14- CD16- | MFI | Monocyte | 15 | 1.061 | 0.805 | 1.398 | 0.673 | 0.931 | 0.633 | 0.358 | 0.721 | 0.980 | 0.664 | 1.447 | 0.919 |
| ebi-a-GCST90002004 | CCR2 on CD14+ CD16- monocyte | MFI | Monocyte | 25 | 0.981 | 0.880 | 1.095 | 0.738 | 0.974 | 0.854 | 0.128 | 0.700 | 0.946 | 0.830 | 1.078 | 0.406 |
| ebi-a-GCST90002005 | CD16 on CD14+ CD16+ monocyte | MFI | Monocyte | 22 | 1.042 | 0.826 | 1.315 | 0.729 | 0.930 | 0.658 | 0.321 | 0.683 | 0.985 | 0.715 | 1.357 | 0.928 |
| ebi-a-GCST90002006 | CD64 on monocyte | MFI | Monocyte | 28 | 1.105 | 0.896 | 1.363 | 0.352 | 0.956 | 0.689 | 0.312 | 0.788 | 1.201 | 0.937 | 1.541 | 0.149 |
| ebi-a-GCST90002007 | HLA DR on CD14+ CD16+ monocyte | MFI | Monocyte | 18 | 1.134 | 1.000 | 1.285 | 0.050 | 1.143 | 0.969 | 0.189 | 0.133 | 1.084 | 0.901 | 1.305 | 0.392 |
| ebi-a-GCST90002008 | CCR2 on monocyte | MFI | Monocyte | 24 | 1.011 | 0.883 | 1.158 | 0.871 | 1.054 | 0.896 | 0.171 | 0.532 | 0.925 | 0.759 | 1.128 | 0.444 |
| ebi-a-GCST90002009 | HLA DR on CD14- CD16- | MFI | Monocyte | 23 | 1.041 | 0.894 | 1.214 | 0.604 | 0.945 | 0.768 | 0.196 | 0.600 | 0.967 | 0.782 | 1.197 | 0.761 |
| ebi-a-GCST90002010 | HLA DR on monocyte | MFI | Monocyte | 16 | 1.103 | 0.888 | 1.371 | 0.374 | 0.947 | 0.662 | 0.339 | 0.769 | 1.075 | 0.832 | 1.389 | 0.581 |
| ebi-a-GCST90002011 | CD64 on CD14+ CD16+ monocyte | MFI | Monocyte | 11 | 1.595 | 0.832 | 3.058 | 0.160 | 0.794 | 0.176 | 1.195 | 0.771 | 1.922 | 0.905 | 4.086 | 0.089 |
| ebi-a-GCST90002012 | CX3CR1 on CD14- CD16+ monocyte | MFI | Monocyte | 16 | 0.875 | 0.654 | 1.170 | 0.367 | 1.025 | 0.639 | 0.484 | 0.920 | 0.967 | 0.640 | 1.460 | 0.872 |
| ebi-a-GCST90002013 | CCR2 on myeloid Dendritic Cell | MFI | cDC | 13 | 0.955 | 0.798 | 1.142 | 0.613 | 0.881 | 0.708 | 0.193 | 0.282 | 0.875 | 0.700 | 1.093 | 0.239 |
| ebi-a-GCST90002014 | CCR2 on CD62L+ myeloid Dendritic Cell | MFI | cDC | 14 | 1.227 | 0.900 | 1.673 | 0.196 | 0.996 | 0.510 | 0.667 | 0.990 | 1.277 | 0.849 | 1.923 | 0.240 |
| ebi-a-GCST90002015 | CCR2 on plasmacytoid Dendritic Cell | MFI | cDC | 18 | 0.950 | 0.754 | 1.198 | 0.666 | 0.830 | 0.590 | 0.283 | 0.300 | 0.972 | 0.699 | 1.352 | 0.868 |
| ebi-a-GCST90002016 | CCR2 on CD62L+ plasmacytoid Dendritic Cell | MFI | cDC | 18 | 0.936 | 0.741 | 1.181 | 0.576 | 0.852 | 0.605 | 0.292 | 0.373 | 0.956 | 0.694 | 1.316 | 0.780 |
| ebi-a-GCST90002017 | CCR2 on monocyte | MFI | cDC | 25 | 0.906 | 0.707 | 1.161 | 0.436 | 0.941 | 0.564 | 0.481 | 0.817 | 0.844 | 0.600 | 1.186 | 0.328 |
| ebi-a-GCST90002018 | CCR2 on granulocyte | MFI | cDC | 16 | 0.964 | 0.745 | 1.248 | 0.783 | 0.799 | 0.566 | 0.276 | 0.223 | 0.941 | 0.661 | 1.339 | 0.734 |
| ebi-a-GCST90002019 | CD14 on Monocytic Myeloid-Derived Suppressor Cells | MFI | Myeloid cell | 23 | 0.936 | 0.802 | 1.093 | 0.404 | 0.899 | 0.724 | 0.195 | 0.346 | 0.919 | 0.739 | 1.145 | 0.452 |
| ebi-a-GCST90002020 | CD14 on CD33+ HLA DR+ CD14dim | MFI | Myeloid cell | 17 | 1.090 | 0.829 | 1.433 | 0.537 | 1.608 | 0.834 | 1.056 | 0.177 | 0.915 | 0.623 | 1.345 | 0.651 |
| ebi-a-GCST90002021 | CD14 on CD33dim HLA DR+ CD11b+ | MFI | Myeloid cell | 18 | 0.820 | 0.657 | 1.023 | 0.079 | 0.694 | 0.441 | 0.314 | 0.133 | 0.817 | 0.608 | 1.098 | 0.181 |
| ebi-a-GCST90002022 | CD4 on CD4+ T cell | MFI | Maturation stages of T cell | 22 | 0.919 | 0.703 | 1.202 | 0.539 | 1.182 | 0.677 | 0.658 | 0.563 | 1.016 | 0.713 | 1.447 | 0.930 |
| ebi-a-GCST90002023 | CD4 on Central Memory CD4+ T cell | MFI | Maturation stages of T cell | 15 | 1.006 | 0.749 | 1.353 | 0.966 | 1.025 | 0.561 | 0.617 | 0.938 | 1.065 | 0.717 | 1.584 | 0.754 |
| ebi-a-GCST90002024 | CD4 on naive CD4+ T cell | MFI | Maturation stages of T cell | 20 | 0.892 | 0.622 | 1.279 | 0.535 | 0.716 | 0.326 | 0.564 | 0.417 | 0.979 | 0.620 | 1.544 | 0.926 |
| ebi-a-GCST90002025 | CD4 on Effector Memory CD4+ T cell | MFI | Maturation stages of T cell | 19 | 1.034 | 0.798 | 1.340 | 0.801 | 1.136 | 0.758 | 0.460 | 0.545 | 1.140 | 0.807 | 1.610 | 0.457 |
| ebi-a-GCST90002026 | CD4 on Terminally Differentiated CD4+ T cell | MFI | Maturation stages of T cell | 23 | 1.066 | 0.787 | 1.444 | 0.679 | 0.944 | 0.557 | 0.498 | 0.832 | 0.971 | 0.644 | 1.464 | 0.889 |
| ebi-a-GCST90002027 | CD4 on CD45RA+ CD4+ T cell | MFI | Maturation stages of T cell | 26 | 0.906 | 0.688 | 1.192 | 0.480 | 0.827 | 0.479 | 0.452 | 0.501 | 0.929 | 0.653 | 1.320 | 0.681 |
| ebi-a-GCST90002028 | CD19 on B cell | MFI | TBNK | 22 | 1.064 | 0.770 | 1.470 | 0.707 | 1.054 | 0.645 | 0.518 | 0.836 | 0.929 | 0.616 | 1.402 | 0.726 |
| ebi-a-GCST90002029 | CD39 on CD39+ CD8+ T cell | MFI | Treg | 23 | 1.177 | 0.884 | 1.566 | 0.264 | 1.003 | 0.548 | 0.606 | 0.991 | 1.130 | 0.778 | 1.641 | 0.520 |
| ebi-a-GCST90002030 | CD39 on CD39+ activated CD4 Treg | MFI | Treg | 22 | 1.275 | 1.010 | 1.610 | 0.041 | 1.401 | 0.833 | 0.728 | 0.218 | 1.464 | 1.060 | 2.022 | 0.021 |
| ebi-a-GCST90002031 | CD39 on CD39+ secreting CD4 Treg | MFI | Treg | 23 | 1.095 | 0.949 | 1.262 | 0.213 | 1.120 | 0.919 | 0.222 | 0.273 | 1.028 | 0.857 | 1.232 | 0.769 |
| ebi-a-GCST90002032 | CD39 on CD39+ CD4+ T cell | MFI | Treg | 20 | 1.093 | 0.928 | 1.287 | 0.286 | 0.930 | 0.724 | 0.233 | 0.579 | 0.967 | 0.792 | 1.181 | 0.740 |
| ebi-a-GCST90002033 | CD39 on granulocyte | MFI | Treg | 26 | 1.149 | 0.922 | 1.432 | 0.217 | 1.277 | 0.930 | 0.404 | 0.144 | 1.097 | 0.769 | 1.566 | 0.609 |
| ebi-a-GCST90002034 | CD39 on monocyte | MFI | Treg | 21 | 0.953 | 0.842 | 1.079 | 0.448 | 0.904 | 0.778 | 0.136 | 0.205 | 0.934 | 0.788 | 1.108 | 0.434 |
| ebi-a-GCST90002035 | CD80 on myeloid Dendritic Cell | MFI | cDC | 26 | 1.095 | 0.890 | 1.348 | 0.389 | 1.052 | 0.775 | 0.321 | 0.746 | 1.001 | 0.757 | 1.323 | 0.995 |
| ebi-a-GCST90002036 | CD80 on CD62L+ myeloid Dendritic Cell | MFI | cDC | 26 | 1.038 | 0.892 | 1.210 | 0.627 | 1.065 | 0.870 | 0.216 | 0.547 | 0.966 | 0.789 | 1.183 | 0.740 |
| ebi-a-GCST90002037 | CD80 on plasmacytoid Dendritic Cell | MFI | cDC | 19 | 0.984 | 0.815 | 1.189 | 0.867 | 1.073 | 0.831 | 0.274 | 0.595 | 0.980 | 0.757 | 1.270 | 0.881 |
| ebi-a-GCST90002038 | CD80 on CD62L+ plasmacytoid Dendritic Cell | MFI | cDC | 19 | 0.950 | 0.796 | 1.133 | 0.568 | 1.011 | 0.797 | 0.240 | 0.929 | 0.937 | 0.731 | 1.201 | 0.610 |
| ebi-a-GCST90002039 | CD80 on monocyte | MFI | cDC | 20 | 1.286 | 1.001 | 1.652 | 0.049 | 1.220 | 0.835 | 0.463 | 0.318 | 1.226 | 0.867 | 1.735 | 0.249 |
| ebi-a-GCST90002040 | CD80 on granulocyte | MFI | cDC | 32 | 1.004 | 0.828 | 1.217 | 0.967 | 0.986 | 0.740 | 0.283 | 0.926 | 1.170 | 0.877 | 1.559 | 0.286 |
| ebi-a-GCST90002041 | CD45 on lymphocyte | MFI | Myeloid cell | 16 | 0.867 | 0.569 | 1.320 | 0.505 | 0.852 | 0.281 | 0.944 | 0.781 | 0.773 | 0.480 | 1.243 | 0.288 |
| ebi-a-GCST90002042 | CD45 on CD33+ HLA DR+ CD14- | MFI | Myeloid cell | 18 | 0.992 | 0.755 | 1.304 | 0.955 | 0.901 | 0.365 | 0.815 | 0.824 | 1.204 | 0.809 | 1.793 | 0.360 |
| ebi-a-GCST90002043 | CD45 on CD33+ HLA DR+ CD14dim | MFI | Myeloid cell | 16 | 1.045 | 0.838 | 1.303 | 0.698 | 1.053 | 0.752 | 0.354 | 0.769 | 1.222 | 0.896 | 1.665 | 0.205 |
| ebi-a-GCST90002044 | CD45 on CD33dim HLA DR+ CD11b- | MFI | Myeloid cell | 9 | 0.884 | 0.586 | 1.332 | 0.555 | 1.945 | 0.559 | 2.424 | 0.330 | 0.895 | 0.527 | 1.517 | 0.679 |
| ebi-a-GCST90002045 | CD45 on CD33- HLA DR- | MFI | Myeloid cell | 14 | 1.086 | 0.777 | 1.519 | 0.629 | 1.306 | 0.647 | 0.917 | 0.471 | 1.348 | 0.887 | 2.047 | 0.162 |
| ebi-a-GCST90002046 | CD45 on CD33- HLA DR+ | MFI | Myeloid cell | 22 | 1.064 | 0.957 | 1.182 | 0.253 | 1.109 | 0.976 | 0.141 | 0.127 | 1.101 | 0.967 | 1.254 | 0.147 |
| ebi-a-GCST90002047 | CD45 on Granulocytic Myeloid-Derived Suppressor Cells | MFI | Myeloid cell | 18 | 0.981 | 0.786 | 1.224 | 0.864 | 1.318 | 0.836 | 0.600 | 0.252 | 1.059 | 0.768 | 1.459 | 0.727 |
| ebi-a-GCST90002048 | CD45 on CD66b++ myelod cell | MFI | Myeloid cell | 14 | 0.839 | 0.673 | 1.046 | 0.120 | 0.867 | 0.621 | 0.289 | 0.418 | 0.858 | 0.630 | 1.168 | 0.330 |
| ebi-a-GCST90002049 | CD45 on Monocytic Myeloid-Derived Suppressor Cells | MFI | Myeloid cell | 16 | 0.998 | 0.793 | 1.256 | 0.986 | 0.953 | 0.639 | 0.380 | 0.815 | 1.167 | 0.841 | 1.620 | 0.355 |
| ebi-a-GCST90002050 | CD45 on CD33dim HLA DR- | MFI | Myeloid cell | 17 | 1.098 | 0.807 | 1.493 | 0.553 | 1.595 | 0.905 | 0.905 | 0.127 | 1.113 | 0.766 | 1.619 | 0.574 |
| ebi-a-GCST90002051 | CD45 on basophil | MFI | Myeloid cell | 16 | 0.779 | 0.603 | 1.007 | 0.057 | 0.951 | 0.506 | 0.601 | 0.879 | 0.926 | 0.652 | 1.314 | 0.666 |
| ebi-a-GCST90002052 | CD45 on Immature Myeloid-Derived Suppressor Cells | MFI | Myeloid cell | 10 | 1.089 | 0.855 | 1.387 | 0.491 | 0.985 | 0.653 | 0.406 | 0.946 | 0.981 | 0.762 | 1.263 | 0.881 |
| ebi-a-GCST90002053 | CD45 on CD33+ HLA DR+ | MFI | Myeloid cell | 16 | 0.864 | 0.731 | 1.020 | 0.085 | 0.844 | 0.682 | 0.180 | 0.143 | 0.846 | 0.680 | 1.054 | 0.136 |
| ebi-a-GCST90002054 | CD8 on Central Memory CD8+ T cell | MFI | Maturation stages of T cell | 13 | 0.966 | 0.618 | 1.509 | 0.878 | 2.445 | 0.858 | 2.562 | 0.123 | 1.296 | 0.750 | 2.240 | 0.352 |
| ebi-a-GCST90002055 | CD8 on naive CD8+ T cell | MFI | Maturation stages of T cell | 16 | 0.938 | 0.662 | 1.328 | 0.718 | 1.430 | 0.762 | 0.900 | 0.284 | 1.131 | 0.713 | 1.795 | 0.601 |
| ebi-a-GCST90002056 | CD8 on Effector Memory CD8+ T cell | MFI | Maturation stages of T cell | 24 | 1.179 | 0.919 | 1.513 | 0.194 | 1.095 | 0.704 | 0.484 | 0.690 | 1.121 | 0.797 | 1.576 | 0.511 |
| ebi-a-GCST90002057 | CD8 on Terminally Differentiated CD8+ T cell | MFI | Maturation stages of T cell | 17 | 0.939 | 0.709 | 1.242 | 0.657 | 1.457 | 0.902 | 0.699 | 0.145 | 1.173 | 0.812 | 1.694 | 0.395 |
| ebi-a-GCST90002058 | CD8 on CD8+ T cell | MFI | TBNK | 25 | 0.879 | 0.703 | 1.100 | 0.260 | 0.758 | 0.547 | 0.247 | 0.108 | 0.802 | 0.593 | 1.084 | 0.150 |
| ebi-a-GCST90002059 | CD8 on Natural Killer T | MFI | TBNK | 17 | 0.844 | 0.637 | 1.119 | 0.239 | 0.802 | 0.501 | 0.378 | 0.374 | 0.823 | 0.535 | 1.265 | 0.373 |
| ebi-a-GCST90002060 | CD8 on HLA DR+ CD8+ T cell | MFI | TBNK | 24 | 0.961 | 0.807 | 1.143 | 0.651 | 0.982 | 0.782 | 0.224 | 0.876 | 0.924 | 0.727 | 1.174 | 0.518 |
| ebi-a-GCST90002061 | CD4 on CD39+ CD4+ T cell | MFI | Treg | 26 | 1.072 | 0.834 | 1.378 | 0.588 | 1.101 | 0.693 | 0.509 | 0.687 | 0.929 | 0.659 | 1.310 | 0.674 |
| ebi-a-GCST90002062 | CD4 on CD28+ CD4+ T cell | MFI | Treg | 21 | 0.783 | 0.585 | 1.048 | 0.101 | 0.591 | 0.343 | 0.321 | 0.073 | 0.772 | 0.491 | 1.215 | 0.264 |
| ebi-a-GCST90002063 | CD4 on CD4 Treg | MFI | Treg | 26 | 0.916 | 0.733 | 1.146 | 0.444 | 0.994 | 0.732 | 0.305 | 0.969 | 0.948 | 0.715 | 1.259 | 0.714 |
| ebi-a-GCST90002064 | CD4 on resting CD4 Treg | MFI | Treg | 13 | 1.405 | 0.890 | 2.217 | 0.144 | 1.214 | 0.556 | 0.949 | 0.636 | 1.784 | 1.046 | 3.040 | 0.033 |
| ebi-a-GCST90002065 | CD4 on CD39+ resting CD4 Treg | MFI | Treg | 13 | 1.064 | 0.823 | 1.376 | 0.636 | 1.004 | 0.707 | 0.352 | 0.984 | 1.098 | 0.767 | 1.571 | 0.609 |
| ebi-a-GCST90002066 | CD4 on activated CD4 Treg | MFI | Treg | 23 | 0.992 | 0.849 | 1.159 | 0.921 | 1.014 | 0.830 | 0.203 | 0.896 | 0.963 | 0.776 | 1.196 | 0.735 |
| ebi-a-GCST90002067 | CD4 on CD39+ activated CD4 Treg | MFI | Treg | 22 | 1.149 | 0.911 | 1.450 | 0.242 | 1.212 | 0.846 | 0.436 | 0.307 | 1.231 | 0.882 | 1.718 | 0.222 |
| ebi-a-GCST90002068 | CD4 on secreting CD4 Treg | MFI | Treg | 26 | 1.113 | 0.915 | 1.353 | 0.283 | 1.031 | 0.774 | 0.295 | 0.837 | 1.083 | 0.808 | 1.450 | 0.595 |
| ebi-a-GCST90002069 | CD4 on CD39+ secreting CD4 Treg | MFI | Treg | 22 | 1.097 | 0.945 | 1.273 | 0.223 | 1.182 | 0.981 | 0.220 | 0.093 | 1.137 | 0.921 | 1.403 | 0.233 |
| ebi-a-GCST90002070 | CD4 on activated & secreting CD4 Treg | MFI | Treg | 29 | 0.969 | 0.823 | 1.140 | 0.703 | 0.998 | 0.803 | 0.216 | 0.983 | 0.959 | 0.781 | 1.178 | 0.692 |
| ebi-a-GCST90002071 | SSC-A on myeloid Dendritic Cell | Morphological parameter | cDC | 17 | 1.031 | 0.914 | 1.162 | 0.620 | 1.006 | 0.876 | 0.139 | 0.934 | 1.035 | 0.902 | 1.186 | 0.626 |
| ebi-a-GCST90002072 | SSC-A on plasmacytoid Dendritic Cell | Morphological parameter | cDC | 25 | 0.905 | 0.720 | 1.137 | 0.390 | 0.907 | 0.641 | 0.315 | 0.587 | 0.850 | 0.595 | 1.214 | 0.372 |
| ebi-a-GCST90002073 | SSC-A on monocyte | Morphological parameter | cDC | 21 | 0.942 | 0.762 | 1.165 | 0.581 | 1.049 | 0.729 | 0.381 | 0.801 | 1.038 | 0.762 | 1.413 | 0.814 |
| ebi-a-GCST90002074 | SSC-A on CD14+ monocyte | Morphological parameter | TBNK | 21 | 0.855 | 0.652 | 1.119 | 0.254 | 0.901 | 0.577 | 0.401 | 0.651 | 0.991 | 0.669 | 1.469 | 0.964 |
| ebi-a-GCST90002075 | SSC-A on B cell | Morphological parameter | TBNK | 13 | 0.934 | 0.638 | 1.368 | 0.727 | 0.750 | 0.393 | 0.485 | 0.401 | 0.644 | 0.401 | 1.035 | 0.069 |
| ebi-a-GCST90002076 | SSC-A on Natural Killer | Morphological parameter | TBNK | 23 | 1.055 | 0.827 | 1.345 | 0.666 | 1.104 | 0.731 | 0.455 | 0.642 | 1.021 | 0.711 | 1.465 | 0.912 |
| ebi-a-GCST90002077 | SSC-A on HLA DR+ Natural Killer | Morphological parameter | TBNK | 27 | 0.897 | 0.753 | 1.069 | 0.224 | 0.950 | 0.753 | 0.221 | 0.668 | 0.878 | 0.684 | 1.128 | 0.308 |
| ebi-a-GCST90002078 | SSC-A on granulocyte | Morphological parameter | TBNK | 24 | 1.058 | 0.861 | 1.300 | 0.590 | 1.254 | 0.918 | 0.391 | 0.169 | 1.083 | 0.768 | 1.527 | 0.648 |
| ebi-a-GCST90002079 | SSC-A on lymphocyte | Morphological parameter | TBNK | 17 | 0.873 | 0.556 | 1.370 | 0.555 | 2.284 | 0.669 | 2.804 | 0.207 | 0.723 | 0.405 | 1.289 | 0.272 |
| ebi-a-GCST90002080 | SSC-A on T cell | Morphological parameter | TBNK | 22 | 1.017 | 0.769 | 1.345 | 0.905 | 1.127 | 0.766 | 0.435 | 0.551 | 0.849 | 0.563 | 1.280 | 0.435 |
| ebi-a-GCST90002081 | SSC-A on CD4+ T cell | Morphological parameter | TBNK | 26 | 0.835 | 0.615 | 1.133 | 0.247 | 0.680 | 0.393 | 0.373 | 0.181 | 0.744 | 0.491 | 1.128 | 0.164 |
| ebi-a-GCST90002082 | SSC-A on CD8+ T cell | Morphological parameter | TBNK | 17 | 1.033 | 0.815 | 1.309 | 0.786 | 1.003 | 0.750 | 0.291 | 0.987 | 1.105 | 0.788 | 1.549 | 0.562 |
| ebi-a-GCST90002083 | SSC-A on HLA DR+ T cell | Morphological parameter | TBNK | 20 | 1.202 | 0.893 | 1.617 | 0.225 | 0.827 | 0.471 | 0.467 | 0.518 | 1.257 | 0.811 | 1.948 | 0.306 |
| ebi-a-GCST90002084 | SSC-A on Natural Killer T | Morphological parameter | TBNK | 19 | 0.999 | 0.873 | 1.142 | 0.984 | 0.974 | 0.833 | 0.152 | 0.745 | 1.005 | 0.837 | 1.208 | 0.955 |
| ebi-a-GCST90002085 | SSC-A on HLA DR+ CD4+ T cell | Morphological parameter | TBNK | 22 | 0.829 | 0.641 | 1.072 | 0.152 | 0.897 | 0.598 | 0.364 | 0.605 | 0.876 | 0.604 | 1.270 | 0.484 |
| ebi-a-GCST90002086 | SSC-A on HLA DR+ CD8+ T cell | Morphological parameter | TBNK | 24 | 0.947 | 0.746 | 1.203 | 0.657 | 0.849 | 0.596 | 0.300 | 0.375 | 0.884 | 0.619 | 1.263 | 0.498 |
| ebi-a-GCST90002087 | CD11c on myeloid Dendritic Cell | MFI | cDC | 30 | 0.979 | 0.825 | 1.163 | 0.810 | 0.906 | 0.723 | 0.204 | 0.397 | 1.002 | 0.789 | 1.272 | 0.987 |
| ebi-a-GCST90002088 | CD11c on CD62L+ myeloid Dendritic Cell | MFI | cDC | 25 | 0.953 | 0.798 | 1.138 | 0.594 | 0.978 | 0.775 | 0.228 | 0.855 | 1.002 | 0.779 | 1.289 | 0.987 |
| ebi-a-GCST90002089 | CD11c on monocyte | MFI | cDC | 17 | 1.084 | 0.868 | 1.352 | 0.477 | 0.900 | 0.641 | 0.305 | 0.552 | 0.972 | 0.729 | 1.297 | 0.849 |
| ebi-a-GCST90002090 | CD11c on granulocyte | MFI | cDC | 21 | 1.009 | 0.771 | 1.320 | 0.949 | 0.868 | 0.539 | 0.414 | 0.567 | 0.937 | 0.656 | 1.339 | 0.721 |
| ebi-a-GCST90002091 | CD11b on CD14+ monocyte | MFI | Myeloid cell | 20 | 1.020 | 0.870 | 1.197 | 0.805 | 0.869 | 0.680 | 0.212 | 0.273 | 0.947 | 0.757 | 1.186 | 0.635 |
| ebi-a-GCST90002092 | CD11b on Granulocytic Myeloid-Derived Suppressor Cells | MFI | Myeloid cell | 3 | 1.012 | 0.770 | 1.331 | 0.931 | 1.017 | 0.407 | 0.931 | 0.977 | 0.930 | 0.671 | 1.288 | 0.661 |
| ebi-a-GCST90002093 | CD11b on CD66b++ myeloid cell | MFI | Myeloid cell | 17 | 1.111 | 0.863 | 1.431 | 0.415 | 0.931 | 0.563 | 0.468 | 0.784 | 1.177 | 0.821 | 1.688 | 0.375 |
| ebi-a-GCST90002094 | CD11b on Monocytic Myeloid-Derived Suppressor Cells | MFI | Myeloid cell | 16 | 0.999 | 0.824 | 1.211 | 0.989 | 0.747 | 0.552 | 0.226 | 0.080 | 1.112 | 0.844 | 1.465 | 0.449 |
| ebi-a-GCST90002095 | CD11b on CD33dim HLA DR- | MFI | Myeloid cell | 23 | 0.859 | 0.702 | 1.052 | 0.142 | 0.919 | 0.619 | 0.364 | 0.682 | 0.886 | 0.666 | 1.177 | 0.403 |
| ebi-a-GCST90002096 | CD11b on basophil | MFI | Myeloid cell | 19 | 0.736 | 0.569 | 0.952 | 0.020 | 0.968 | 0.519 | 0.605 | 0.921 | 0.749 | 0.526 | 1.065 | 0.107 |
| ebi-a-GCST90002097 | CD11b on CD33+ HLA DR+ CD14dim | MFI | Myeloid cell | 20 | 0.893 | 0.717 | 1.111 | 0.309 | 0.941 | 0.598 | 0.427 | 0.797 | 1.136 | 0.827 | 1.560 | 0.430 |
| ebi-a-GCST90002098 | CD45RA on naive CD4+ T cell | MFI | Maturation stages of T cell | 33 | 1.194 | 1.024 | 1.391 | 0.023 | 1.212 | 0.996 | 0.237 | 0.064 | 1.061 | 0.842 | 1.336 | 0.618 |
| ebi-a-GCST90002099 | CD4RA on Terminally Differentiated CD4+ T cell | MFI | Maturation stages of T cell | 33 | 1.008 | 0.886 | 1.148 | 0.900 | 1.010 | 0.854 | 0.170 | 0.906 | 1.152 | 0.928 | 1.430 | 0.199 |
| ebi-a-GCST90002100 | CD45RA on naive CD8+ T cell | MFI | Maturation stages of T cell | 21 | 0.761 | 0.577 | 1.004 | 0.053 | 0.965 | 0.586 | 0.481 | 0.890 | 0.828 | 0.564 | 1.216 | 0.335 |
| ebi-a-GCST90002101 | CD45RA on Terminally Differentiated CD8+ T cell | MFI | Maturation stages of T cell | 14 | 0.882 | 0.601 | 1.293 | 0.519 | 1.037 | 0.474 | 0.811 | 0.929 | 0.791 | 0.470 | 1.329 | 0.376 |
| ebi-a-GCST90002102 | CD45RA on resting CD4 Treg | MFI | Treg | 27 | 1.015 | 0.907 | 1.137 | 0.794 | 1.053 | 0.892 | 0.175 | 0.550 | 1.116 | 0.941 | 1.323 | 0.207 |
| ebi-a-GCST90002103 | CD45RA on CD39+ resting CD4 Treg | MFI | Treg | 8 | 1.052 | 0.767 | 1.442 | 0.754 | 1.119 | 0.746 | 0.454 | 0.606 | 1.160 | 0.785 | 1.715 | 0.455 |
| ebi-a-GCST90002104 | HLA DR on myeloid Dendritic Cell | MFI | cDC | 15 | 1.023 | 0.873 | 1.200 | 0.776 | 0.958 | 0.756 | 0.227 | 0.731 | 0.958 | 0.781 | 1.175 | 0.678 |
| ebi-a-GCST90002105 | HLA DR on plasmacytoid Dendritic Cell | MFI | cDC | 22 | 1.038 | 0.895 | 1.204 | 0.623 | 0.933 | 0.751 | 0.202 | 0.536 | 0.987 | 0.817 | 1.192 | 0.892 |
| ebi-a-GCST90002106 | HLA DR on Dendritic Cell | MFI | cDC | 18 | 1.110 | 0.930 | 1.324 | 0.249 | 0.992 | 0.738 | 0.294 | 0.959 | 1.015 | 0.806 | 1.279 | 0.897 |
| ebi-a-GCST90002107 | HLA DR on Hematopoietic Stem Cell | MFI | Myeloid cell | 6 | 0.871 | 0.583 | 1.301 | 0.500 | 0.963 | 0.232 | 1.372 | 0.962 | 0.827 | 0.572 | 1.194 | 0.311 |
| ebi-a-GCST90002108 | HLA DR on CD33+ HLA DR+ CD14- | MFI | Myeloid cell | 24 | 1.104 | 0.985 | 1.238 | 0.090 | 1.026 | 0.863 | 0.178 | 0.772 | 1.130 | 0.961 | 1.328 | 0.141 |
| ebi-a-GCST90002109 | HLA DR on CD33+ HLA DR+ CD14dim | MFI | Myeloid cell | 20 | 1.106 | 0.913 | 1.340 | 0.303 | 0.888 | 0.642 | 0.287 | 0.479 | 1.093 | 0.831 | 1.437 | 0.526 |
| ebi-a-GCST90002110 | HLA DR on CD33dim HLA DR+ CD11b+ | MFI | Myeloid cell | 23 | 1.022 | 0.877 | 1.192 | 0.778 | 1.118 | 0.892 | 0.252 | 0.344 | 1.064 | 0.871 | 1.300 | 0.543 |
| ebi-a-GCST90002111 | HLA DR on CD33dim HLA DR+ CD11b- | MFI | Myeloid cell | 18 | 0.935 | 0.745 | 1.174 | 0.562 | 1.244 | 0.768 | 0.601 | 0.389 | 1.124 | 0.842 | 1.500 | 0.427 |
| ebi-a-GCST90002112 | HLA DR on CD33- HLA DR+ | MFI | Myeloid cell | 12 | 0.970 | 0.804 | 1.171 | 0.754 | 0.888 | 0.666 | 0.256 | 0.440 | 0.960 | 0.765 | 1.205 | 0.726 |
| ebi-a-GCST90002113 | HLA DR on HLA DR+ T cell | MFI | TBNK | 18 | 0.875 | 0.709 | 1.081 | 0.216 | 0.872 | 0.657 | 0.247 | 0.357 | 0.959 | 0.702 | 1.311 | 0.795 |
| ebi-a-GCST90002114 | HLA DR on HLA DR+ CD4+ T cell | MFI | TBNK | 20 | 0.887 | 0.652 | 1.206 | 0.443 | 1.173 | 0.636 | 0.719 | 0.616 | 0.995 | 0.627 | 1.578 | 0.982 |
| ebi-a-GCST90002115 | HLA DR on HLA DR+ CD8+ T cell | MFI | TBNK | 20 | 1.006 | 0.725 | 1.396 | 0.972 | 0.702 | 0.377 | 0.436 | 0.280 | 0.919 | 0.582 | 1.453 | 0.719 |
| ebi-a-GCST90002116 | HLA DR on B cell | MFI | TBNK | 20 | 1.035 | 0.853 | 1.257 | 0.726 | 1.005 | 0.735 | 0.314 | 0.974 | 0.880 | 0.659 | 1.174 | 0.384 |
| ebi-a-GCST90002117 | HLA DR on HLA DR+ Natural Killer | MFI | TBNK | 27 | 1.131 | 0.933 | 1.371 | 0.209 | 1.122 | 0.834 | 0.332 | 0.454 | 1.047 | 0.775 | 1.415 | 0.765 |
| ebi-a-GCST90002118 | CD8 on CD28+ CD45RA- CD8+ T cell | MFI | Treg | 13 | 0.767 | 0.501 | 1.175 | 0.222 | 0.738 | 0.296 | 0.675 | 0.528 | 0.813 | 0.451 | 1.464 | 0.490 |
| ebi-a-GCST90002119 | CD8 on CD28+ CD45RA+ CD8+ T cell | MFI | Treg | 22 | 0.988 | 0.799 | 1.221 | 0.909 | 1.377 | 0.937 | 0.530 | 0.119 | 1.164 | 0.870 | 1.557 | 0.307 |
| ebi-a-GCST90002120 | CD8 on CD28- CD8+ T cell | MFI | Treg | 20 | 1.335 | 0.926 | 1.924 | 0.122 | 0.320 | 0.105 | 0.356 | 0.060 | 1.112 | 0.669 | 1.847 | 0.682 |
| ebi-a-GCST90002121 | CD8 on CD39+ CD8+ T cell | MFI | Treg | 25 | 1.057 | 0.802 | 1.394 | 0.693 | 1.403 | 0.790 | 0.805 | 0.260 | 1.118 | 0.755 | 1.656 | 0.577 |

Note: AC, absolute count; RC, MFI, median fluorescence intensitie; relative count; Treg, regulatory T cell.

**Table S2. Sensitivity analyses of the causal effect of four identified immune cells on AGA**

| **id.exposure** | **trait** | **trait type** | **panel** | **nsnp** | **method** | **or** | **lc_95** | **uc_95** | **pval** | **Q_value** | **Q_pval** | **egger_**  **intercept** | **se** | **pval** | **MR-Presso**  **global test** |
| --- | --- | --- | --- | --- | --- | --- | --- | --- | --- | --- | --- | --- | --- | --- | --- |
| ebi-a-GCST90001941 | CD25 on secreting CD4 Treg | MFI | Treg | 13 | IVW | 1.201 | 1.039 | 1.388 | 0.013 | 11.835 | 0.459 | -0.027 | 0.058 | 0.653 | 0.541 |
| MR-Egger | 1.226 | 1.032 | 1.457 | 0.041 | 11.610 | 0.394 |  |  |  |  |
| WM | 1.268 | 1.037 | 1.551 | 0.021 |  |  |  |  |  |  |
| ebi-a-GCST90001987 | CD64 on CD14+ CD16- monocyte | MFI | Monocyte | 33 | IVW | 1.088 | 1.012 | 1.169 | 0.022 | 30.830 | 0.526 | -0.001 | 0.037 | 0.968 | 0.485 |
| MR-Egger | 1.089 | 1.004 | 1.180 | 0.047 | 30.828 | 0.475 |  |  |  |  |
| WM | 1.129 | 1.002 | 1.272 | 0.047 |  |  |  |  |  |  |
| ebi-a-GCST90001858 | CD3 on CD45RA+ CD4+ T cell | MFI | Treg | 30 | IVW | 0.822 | 0.686 | 0.985 | 0.034 | 34.298 | 0.229 | 0.047 | 0.043 | 0.289 | 0.255 |
| MR-Egger | 0.746 | 0.580 | 0.960 | 0.031 | 32.925 | 0.239 |  |  |  |  |
| WM | 0.765 | 0.607 | 0.964 | 0.023 |  |  |  |  |  |  |
| ebi-a-GCST90001663 | CD28- CD8dim T cell AC | AC | Treg | 27 | IVW | 0.824 | 0.681 | 0.997 | 0.046 | 21.898 | 0.694 | 0.059 | 0.046 | 0.215 | 0.689 |
| MR-Egger | 0.727 | 0.555 | 0.953 | 0.030 | 20.276 | 0.732 |  |  |  |  |
| WM | 0.742 | 0.555 | 0.993 | 0.045 |  |  |  |  |  |  |

Note: AC, absolute count; MFI, median fluorescence intensitie; Treg, regulatory T cell.

**Table S3. Linkage disequilibrium score (LDSC) regression for identified immune phenotypes**

| **id.exposure** | **trait** | **mean_chisq** | **lambda_gc** | **intercept** | **intercept_se** | **ratio** | **ratio_se** | **h2_observed** | **h2_observed_se** | **h2_Z** | **h2_pval** |
| --- | --- | --- | --- | --- | --- | --- | --- | --- | --- | --- | --- |
| ebi-a-GCST90001941 | CD25 on secreting CD4 Treg | 0.995 | 0.996 | 0.989 | 0.007 | 2.288 | -1.596 | 0.088 | 0.119 | 0.741 | 0.459 |
| ebi-a-GCST90001987 | CD64 on CD14+ CD16- monocyte | 1.002 | 0.987 | 0.989 | 0.009 | -5.387 | 4.203 | 0.183 | 0.238 | 0.769 | 0.442 |
| ebi-a-GCST90001858 | CD3 on CD45RA+ CD4+ T cell | 1.000 | 0.984 | 0.990 | 0.011 | -78.381 | 87.155 | 0.173 | 0.154 | 1.122 | 0.262 |

Note: Treg, regulatory T cell.

**Table S4. Instrumental variables for identified** **immune phenotypes**

| **id.exposure** | **snp** | **exposure** | | **outcome** | | **chr.**  **exposure** | **R2** | **F** | **exposure** | | | | **outcome** | | | | **samplesize.exposure** | **steiger_pval** |
| --- | --- | --- | --- | --- | --- | --- | --- | --- | --- | --- | --- | --- | --- | --- | --- | --- | --- | --- |
| **effect_**  **allele** | **other_**  **allele** | **effect_**  **allele.** | **other_**  **allele.** | **beta** | **se.** | **eaf** | **p** | **beta** | **se** | **eaf** | **p** |
| ebi-a-GCST90001941 | rs111399540 | C | T | C | T | 18 | 0.006 | 20.384 | 3.146 | 0.697 | 0.000 | 6.507E-06 | 0.755 | 0.324 | 0.025 | 0.020 | 3435 | 3.022E-05 |
| ebi-a-GCST90001941 | rs113116201 | C | T | C | T | 1 | 0.012 | 42.438 | 1.214 | 0.186 | 0.004 | 8.428E-11 | -0.528 | 0.490 | 0.010 | 0.281 | 3435 | 2.830E-10 |
| ebi-a-GCST90001941 | rs113165806 | A | C | A | C | 7 | 0.007 | 23.483 | 0.184 | 0.038 | 0.126 | 1.306E-06 | -0.081 | 0.120 | 0.233 | 0.503 | 3435 | 2.434E-06 |
| ebi-a-GCST90001941 | rs141518333 | T | C | T | C | 1 | 0.006 | 19.792 | 1.643 | 0.369 | 0.001 | 8.800E-06 | 0.390 | 0.289 | 0.033 | 0.178 | 3435 | 2.304E-05 |
| ebi-a-GCST90001941 | rs145947216 | T | C | T | C | 2 | 0.006 | 22.189 | 0.337 | 0.072 | 0.036 | 2.558E-06 | 0.046 | 0.598 | 0.008 | 0.939 | 3435 | 3.214E-06 |
| ebi-a-GCST90001941 | rs148887938 | A | G | A | G | 7 | 0.006 | 20.139 | -0.490 | 0.109 | 0.015 | 7.359E-06 | 0.216 | 0.461 | 0.013 | 0.639 | 3435 | 1.157E-05 |
| ebi-a-GCST90001941 | rs16843666 | T | C | T | C | 2 | 0.007 | 24.496 | -0.196 | 0.040 | 0.118 | 7.770E-07 | 0.196 | 0.140 | 0.158 | 0.162 | 3435 | 2.340E-06 |
| ebi-a-GCST90001941 | rs4747846 | C | G | C | G | 10 | 0.011 | 38.500 | 0.161 | 0.026 | 0.385 | 6.037E-10 | -0.012 | 0.104 | 0.404 | 0.906 | 3435 | 8.972E-10 |
| ebi-a-GCST90001941 | rs59279177 | G | C | G | C | 6 | 0.007 | 23.053 | -0.125 | 0.026 | 0.395 | 1.639E-06 | -0.250 | 0.127 | 0.206 | 0.048 | 3435 | 6.789E-06 |
| ebi-a-GCST90001941 | rs76863805 | G | C | G | C | 1 | 0.006 | 21.275 | 1.816 | 0.394 | 0.001 | 4.112E-06 | 0.283 | 0.290 | 0.032 | 0.329 | 3435 | 8.865E-06 |
| ebi-a-GCST90001941 | rs7809749 | T | G | T | G | 7 | 0.007 | 24.030 | -0.150 | 0.031 | 0.225 | 9.914E-07 | 0.009 | 0.144 | 0.146 | 0.951 | 3435 | 1.247E-06 |
| ebi-a-GCST90001941 | rs78677147 | A | G | A | G | 18 | 0.006 | 22.120 | -0.294 | 0.062 | 0.043 | 2.646E-06 | -0.416 | 0.295 | 0.030 | 0.158 | 3435 | 7.588E-06 |
| ebi-a-GCST90001941 | rs9596433 | T | C | T | C | 13 | 0.006 | 19.770 | -0.155 | 0.035 | 0.158 | 8.955E-06 | -0.054 | 0.156 | 0.122 | 0.732 | 3435 | 1.295E-05 |
| ebi-a-GCST90001987 | rs112755578 | G | A | G | A | 1 | 0.029 | 108.915 | -0.511 | 149716369 | 0.076 | 0.049 | -0.126 | 0.131 | 0.193 | 0.334 | 3622 | 2.826E-24 |
| ebi-a-GCST90001987 | rs1146114 | C | T | C | T | 12 | 0.006 | 20.091 | 0.119 | 63713121 | 0.660 | 0.026 | 0.116 | 0.102 | 0.535 | 0.254 | 3622 | 1.807E-05 |
| ebi-a-GCST90001987 | rs116004327 | T | G | T | G | 1 | 0.006 | 23.506 | 0.606 | 117459175 | 0.011 | 0.125 | -0.375 | 0.239 | 0.048 | 0.117 | 3622 | 4.381E-06 |
| ebi-a-GCST90001987 | rs116275309 | A | G | A | G | 1 | 0.016 | 58.857 | 0.843 | 150863650 | 0.013 | 0.110 | -0.014 | 0.221 | 0.058 | 0.948 | 3622 | 3.573E-14 |
| ebi-a-GCST90001987 | rs11934532 | G | A | G | A | 4 | 0.006 | 21.972 | 0.143 | 182164089 | 0.217 | 0.031 | -0.002 | 0.112 | 0.288 | 0.988 | 3622 | 3.487E-06 |
| ebi-a-GCST90001987 | rs12135207 | T | C | T | C | 1 | 0.007 | 25.759 | 0.400 | 160944691 | 0.027 | 0.079 | 0.263 | 0.433 | 0.014 | 0.544 | 3622 | 7.636E-07 |
| ebi-a-GCST90001987 | rs1320440 | C | T | C | T | 14 | 0.006 | 21.782 | 0.203 | 101333700 | 0.086 | 0.043 | 0.058 | 0.292 | 0.032 | 0.841 | 3622 | 4.326E-06 |
| ebi-a-GCST90001987 | rs139244126 | A | G | A | G | 2 | 0.005 | 19.644 | 0.502 | 69117194 | 0.012 | 0.113 | -0.499 | 0.720 | 0.005 | 0.488 | 3622 | 1.729E-05 |
| ebi-a-GCST90001987 | rs140329252 | G | C | G | C | 4 | 0.006 | 22.171 | -0.308 | 131026425 | 0.038 | 0.065 | -0.151 | 0.665 | 0.007 | 0.821 | 3622 | 3.610E-06 |
| ebi-a-GCST90001987 | rs142811849 | A | G | A | G | 6 | 0.005 | 19.880 | 3.943 | 45627057 | 0.0001 | 0.884 | 0.405 | 0.552 | 0.009 | 0.463 | 3622 | 1.574E-05 |
| ebi-a-GCST90001987 | rs144823175 | G | C | G | C | 1 | 0.017 | 64.138 | 0.888 | 149858520 | 0.013 | 0.111 | -0.440 | 0.351 | 0.023 | 0.211 | 3622 | 9.260E-15 |
| ebi-a-GCST90001987 | rs145828126 | A | G | A | G | 1 | 0.009 | 32.805 | -0.336 | 120233380 | 0.048 | 0.059 | -0.098 | 0.201 | 0.070 | 0.624 | 3622 | 2.096E-08 |
| ebi-a-GCST90001987 | rs150145799 | C | T | C | T | 1 | 0.116 | 473.247 | 0.775 | 149738590 | 0.133 | 0.036 | 0.419 | 0.217 | 0.061 | 0.054 | 3622 | 1.158E-96 |
| ebi-a-GCST90001987 | rs1560982 | A | G | A | G | 4 | 0.006 | 20.666 | 0.113 | 184826026 | 0.556 | 0.025 | 0.023 | 0.105 | 0.619 | 0.828 | 3622 | 7.705E-06 |
| ebi-a-GCST90001987 | rs16960068 | A | G | A | G | 17 | 0.006 | 20.040 | 0.271 | 64692068 | 0.045 | 0.061 | 0.241 | 0.221 | 0.053 | 0.276 | 3622 | 1.797E-05 |
| ebi-a-GCST90001987 | rs1801274 | G | A | G | A | 1 | 0.071 | 274.629 | 0.429 | 161479745 | 0.326 | 0.026 | 0.066 | 0.101 | 0.503 | 0.513 | 3622 | 1.354E-58 |
| ebi-a-GCST90001987 | rs188268415 | T | C | T | C | 1 | 0.028 | 103.917 | -0.601 | 150401679 | 0.045 | 0.059 | 0.146 | 0.412 | 0.018 | 0.723 | 3622 | 1.378E-23 |
| ebi-a-GCST90001987 | rs190928917 | T | A | T | A | 6 | 0.007 | 25.177 | 0.713 | 157071062 | 0.008 | 0.142 | -0.519 | 0.731 | 0.005 | 0.478 | 3622 | 1.095E-06 |
| ebi-a-GCST90001987 | rs192225504 | T | C | T | C | 7 | 0.007 | 24.486 | -1.871 | 1597362 | 0.001 | 0.378 | -0.332 | 0.803 | 0.004 | 0.679 | 3622 | 1.268E-06 |
| ebi-a-GCST90001987 | rs192899694 | C | T | C | T | 1 | 0.006 | 23.189 | -0.343 | 146480265 | 0.033 | 0.071 | 0.221 | 0.415 | 0.016 | 0.595 | 3622 | 2.633E-06 |
| ebi-a-GCST90001987 | rs406130 | A | G | A | G | 19 | 0.006 | 21.699 | -0.118 | 11940761 | 0.562 | 0.025 | -0.027 | 0.101 | 0.487 | 0.789 | 3622 | 4.710E-06 |
| ebi-a-GCST90001987 | rs587759315 | T | G | T | G | 1 | 0.010 | 36.041 | -0.712 | 121480104 | 0.016 | 0.119 | -0.195 | 0.270 | 0.039 | 0.471 | 3622 | 5.059E-09 |
| ebi-a-GCST90001987 | rs58902422 | G | A | G | A | 14 | 0.007 | 27.039 | -0.282 | 39342923 | 0.057 | 0.054 | 0.175 | 0.318 | 0.026 | 0.583 | 3622 | 3.875E-07 |
| ebi-a-GCST90001987 | rs610249 | A | G | A | G | 1 | 0.006 | 20.756 | -0.117 | 109692641 | 0.597 | 0.026 | 0.094 | 0.103 | 0.559 | 0.359 | 3622 | 1.135E-05 |
| ebi-a-GCST90001987 | rs627319 | C | G | C | G | 11 | 0.006 | 21.057 | 0.268 | 62247621 | 0.951 | 0.058 | -0.153 | 0.373 | 0.980 | 0.682 | 3622 | 7.129E-06 |
| ebi-a-GCST90001987 | rs6480509 | C | A | C | A | 10 | 0.007 | 24.167 | 0.292 | 73071462 | 0.044 | 0.059 | -0.193 | 0.148 | 0.138 | 0.192 | 3622 | 2.677E-06 |
| ebi-a-GCST90001987 | rs72475593 | C | G | C | G | 1 | 0.007 | 25.472 | -0.480 | 146529499 | 0.018 | 0.095 | -0.342 | 0.244 | 0.046 | 0.162 | 3622 | 1.502E-06 |
| ebi-a-GCST90001987 | rs72705789 | T | G | T | G | 1 | 0.006 | 20.903 | 0.170 | 162501593 | 0.133 | 0.037 | 0.079 | 0.226 | 0.055 | 0.725 | 3622 | 7.431E-06 |
| ebi-a-GCST90001987 | rs72774507 | T | C | T | C | 16 | 0.006 | 20.916 | 6.249 | 6170178 | 0.000 | 1.366 | 0.798 | 0.286 | 0.017 | 0.005 | 3622 | 3.212E-05 |
| ebi-a-GCST90001987 | rs76405727 | T | A | T | A | 1 | 0.005 | 19.816 | 0.173 | 119909416 | 0.116 | 0.039 | -0.395 | 0.472 | 0.012 | 0.403 | 3622 | 1.728E-05 |
| ebi-a-GCST90001987 | rs766041 | C | A | C | A | 1 | 0.005 | 19.630 | -0.441 | 165432190 | 0.016 | 0.100 | -0.322 | 0.339 | 0.024 | 0.342 | 3622 | 2.030E-05 |
| ebi-a-GCST90001987 | rs79003328 | A | G | A | G | 6 | 0.005 | 19.713 | 3.926 | 71947935 | 0.0001 | 0.884 | -0.562 | 0.403 | 0.018 | 0.164 | 3622 | 2.531E-05 |
| ebi-a-GCST90001987 | rs80178684 | G | A | G | A | 8 | 0.008 | 30.144 | -0.641 | 59726631 | 0.011 | 0.117 | 1.819 | 0.848 | 0.004 | 0.032 | 3622 | 2.607E-07 |
| ebi-a-GCST90001858 | rs10139012 | C | T | C | T | 0.0294 | 0.008 | 22.770 | -0.140 | 2919 | 0.309 | 14 | 0.108 | 0.119 | 0.242 | 0.361 | 95415204 | 3.780E-06 |
| ebi-a-GCST90001858 | rs12512585 | T | G | T | G | 0.0396 | 0.007 | 21.606 | 0.184 | 2919 | 0.144 | 4 | 0.111 | 0.152 | 0.123 | 0.466 | 44375745 | 6.101E-06 |
| ebi-a-GCST90001858 | rs12921174 | C | T | C | T | 0.0337 | 0.012 | 36.741 | -0.204 | 2919 | 0.204 | 16 | -0.052 | 0.102 | 0.435 | 0.610 | 430304 | 2.756E-09 |
| ebi-a-GCST90001858 | rs141784254 | G | A | G | A | 0.2156 | 0.008 | 22.148 | -1.015 | 2919 | 0.004 | 11 | 0.890 | 0.383 | 0.019 | 0.020 | 120364753 | 1.135E-05 |
| ebi-a-GCST90001858 | rs143262728 | T | C | T | C | 0.3688 | 0.007 | 20.368 | 1.665 | 2919 | 0.002 | 4 | -0.391 | 0.469 | 0.013 | 0.405 | 137926368 | 1.205E-05 |
| ebi-a-GCST90001858 | rs144004160 | T | C | T | C | 0.2009 | 0.007 | 20.203 | -0.903 | 2919 | 0.004 | 8 | 0.211 | 0.348 | 0.021 | 0.546 | 19478029 | 1.155E-05 |
| ebi-a-GCST90001858 | rs146330992 | T | C | T | C | 0.0500 | 0.007 | 19.570 | 0.221 | 2919 | 0.084 | 1 | 0.029 | 0.459 | 0.013 | 0.950 | 165888466 | 1.184E-05 |
| ebi-a-GCST90001858 | rs150857694 | C | T | C | T | 0.0668 | 0.007 | 19.636 | -0.296 | 2919 | 0.043 | 7 | 1.838 | 0.695 | 0.001 | 0.008 | 76111831 | 4.518E-05 |
| ebi-a-GCST90001858 | rs187281020 | G | A | G | A | 0.1012 | 0.008 | 22.829 | -0.484 | 2919 | 0.025 | 19 | -0.554 | 1.524 | 0.001 | 0.716 | 43490062 | 2.666E-06 |
| ebi-a-GCST90001858 | rs2714019 | T | C | T | C | 0.0286 | 0.007 | 19.943 | -0.128 | 2919 | 0.671 | 17 | -0.026 | 0.105 | 0.626 | 0.803 | 70789650 | 1.084E-05 |
| ebi-a-GCST90001858 | rs2808525 | T | C | T | C | 0.0312 | 0.008 | 22.261 | 0.147 | 2919 | 0.247 | 9 | 0.055 | 0.105 | 0.370 | 0.602 | 101320250 | 3.894E-06 |
| ebi-a-GCST90001858 | rs2839523 | A | C | A | C | 0.0274 | 0.007 | 20.659 | -0.124 | 2919 | 0.531 | 21 | 0.072 | 0.105 | 0.614 | 0.489 | 43870045 | 9.626E-06 |
| ebi-a-GCST90001858 | rs2949661 | T | C | T | C | 0.0249 | 0.187 | 671.361 | 0.644 | 2919 | 0.447 | 1 | -0.194 | 0.116 | 0.260 | 0.095 | 167424924 | 5.684E-134 |
| ebi-a-GCST90001858 | rs34135810 | C | T | C | T | 0.1465 | 0.007 | 21.183 | -0.675 | 2919 | 0.009 | 2 | -0.355 | 0.336 | 0.023 | 0.291 | 234652185 | 9.055E-06 |
| ebi-a-GCST90001858 | rs4396110 | A | G | A | G | 0.0274 | 0.009 | 25.736 | -0.139 | 2919 | 0.424 | 1 | 0.142 | 0.115 | 0.268 | 0.218 | 118266529 | 1.046E-06 |
| ebi-a-GCST90001858 | rs4657649 | C | T | C | T | 0.0609 | 0.026 | 78.240 | 0.539 | 2919 | 0.051 | 1 | -0.144 | 0.164 | 0.112 | 0.381 | 167173140 | 5.631E-18 |
| ebi-a-GCST90001858 | rs4683146 | A | G | A | G | 0.0272 | 0.007 | 19.816 | -0.121 | 2919 | 0.495 | 3 | -0.166 | 0.102 | 0.455 | 0.104 | 45898221 | 2.430E-05 |
| ebi-a-GCST90001858 | rs62029957 | A | G | A | G | 0.0436 | 0.007 | 20.120 | 0.196 | 2919 | 0.109 | 16 | 0.026 | 0.354 | 0.021 | 0.941 | 50213168 | 8.989E-06 |
| ebi-a-GCST90001858 | rs62430462 | T | C | T | C | 0.0373 | 0.007 | 20.154 | -0.168 | 2919 | 0.165 | 6 | -0.003 | 0.152 | 0.131 | 0.985 | 83569632 | 8.565E-06 |
| ebi-a-GCST90001858 | rs6751481 | C | T | C | T | 0.0275 | 0.007 | 21.652 | -0.128 | 2919 | 0.476 | 2 | -0.024 | 0.102 | 0.526 | 0.813 | 38897810 | 4.505E-06 |
| ebi-a-GCST90001858 | rs72729208 | A | G | A | G | 0.0567 | 0.007 | 21.571 | 0.263 | 2919 | 0.064 | 5 | 0.562 | 0.235 | 0.051 | 0.017 | 10956252 | 1.556E-05 |
| ebi-a-GCST90001858 | rs72817532 | G | A | G | A | 0.0830 | 0.008 | 24.516 | 0.411 | 2919 | 0.027 | 10 | -0.633 | 0.453 | 0.014 | 0.162 | 30531504 | 2.108E-06 |
| ebi-a-GCST90001858 | rs74620952 | C | T | C | T | 0.2467 | 0.009 | 27.707 | -1.299 | 2919 | 0.003 | 11 | 0.121 | 0.325 | 0.025 | 0.709 | 117753136 | 2.290E-07 |
| ebi-a-GCST90001858 | rs7530127 | C | T | C | T | 0.0278 | 0.008 | 24.429 | -0.138 | 2919 | 0.407 | 1 | 0.125 | 0.111 | 0.309 | 0.259 | 165671820 | 1.876E-06 |
| ebi-a-GCST90001858 | rs7594170 | G | A | G | A | 0.0318 | 0.007 | 20.017 | -0.142 | 2919 | 0.257 | 2 | 0.085 | 0.102 | 0.455 | 0.404 | 51237767 | 1.439E-05 |
| ebi-a-GCST90001858 | rs76066554 | T | C | T | C | 0.2175 | 0.008 | 24.050 | -1.067 | 2919 | 0.004 | 1 | -1.032 | 1.219 | 0.002 | 0.397 | 95285730 | 1.918E-06 |
| ebi-a-GCST90001858 | rs76841186 | C | G | C | G | 0.4729 | 0.007 | 19.819 | 2.106 | 2919 | 0.001 | 14 | -0.802 | 0.475 | 0.011 | 0.091 | 102428341 | 2.513E-05 |
| ebi-a-GCST90001858 | rs78042544 | G | A | G | A | 0.0924 | 0.007 | 20.708 | 0.421 | 2919 | 0.021 | 15 | 0.045 | 0.202 | 0.071 | 0.825 | 36121803 | 7.226E-06 |
| ebi-a-GCST90001858 | rs79179998 | A | G | A | G | 0.0339 | 0.016 | 46.269 | 0.230 | 2919 | 0.209 | 3 | 0.128 | 0.164 | 0.108 | 0.432 | 45947066 | 3.074E-11 |
| ebi-a-GCST90001858 | rs79844317 | T | C | T | C | 0.0872 | 0.007 | 21.360 | -0.403 | 2919 | 0.025 | 10 | -0.559 | 0.675 | 0.005 | 0.407 | 100127250 | 7.304E-06 |


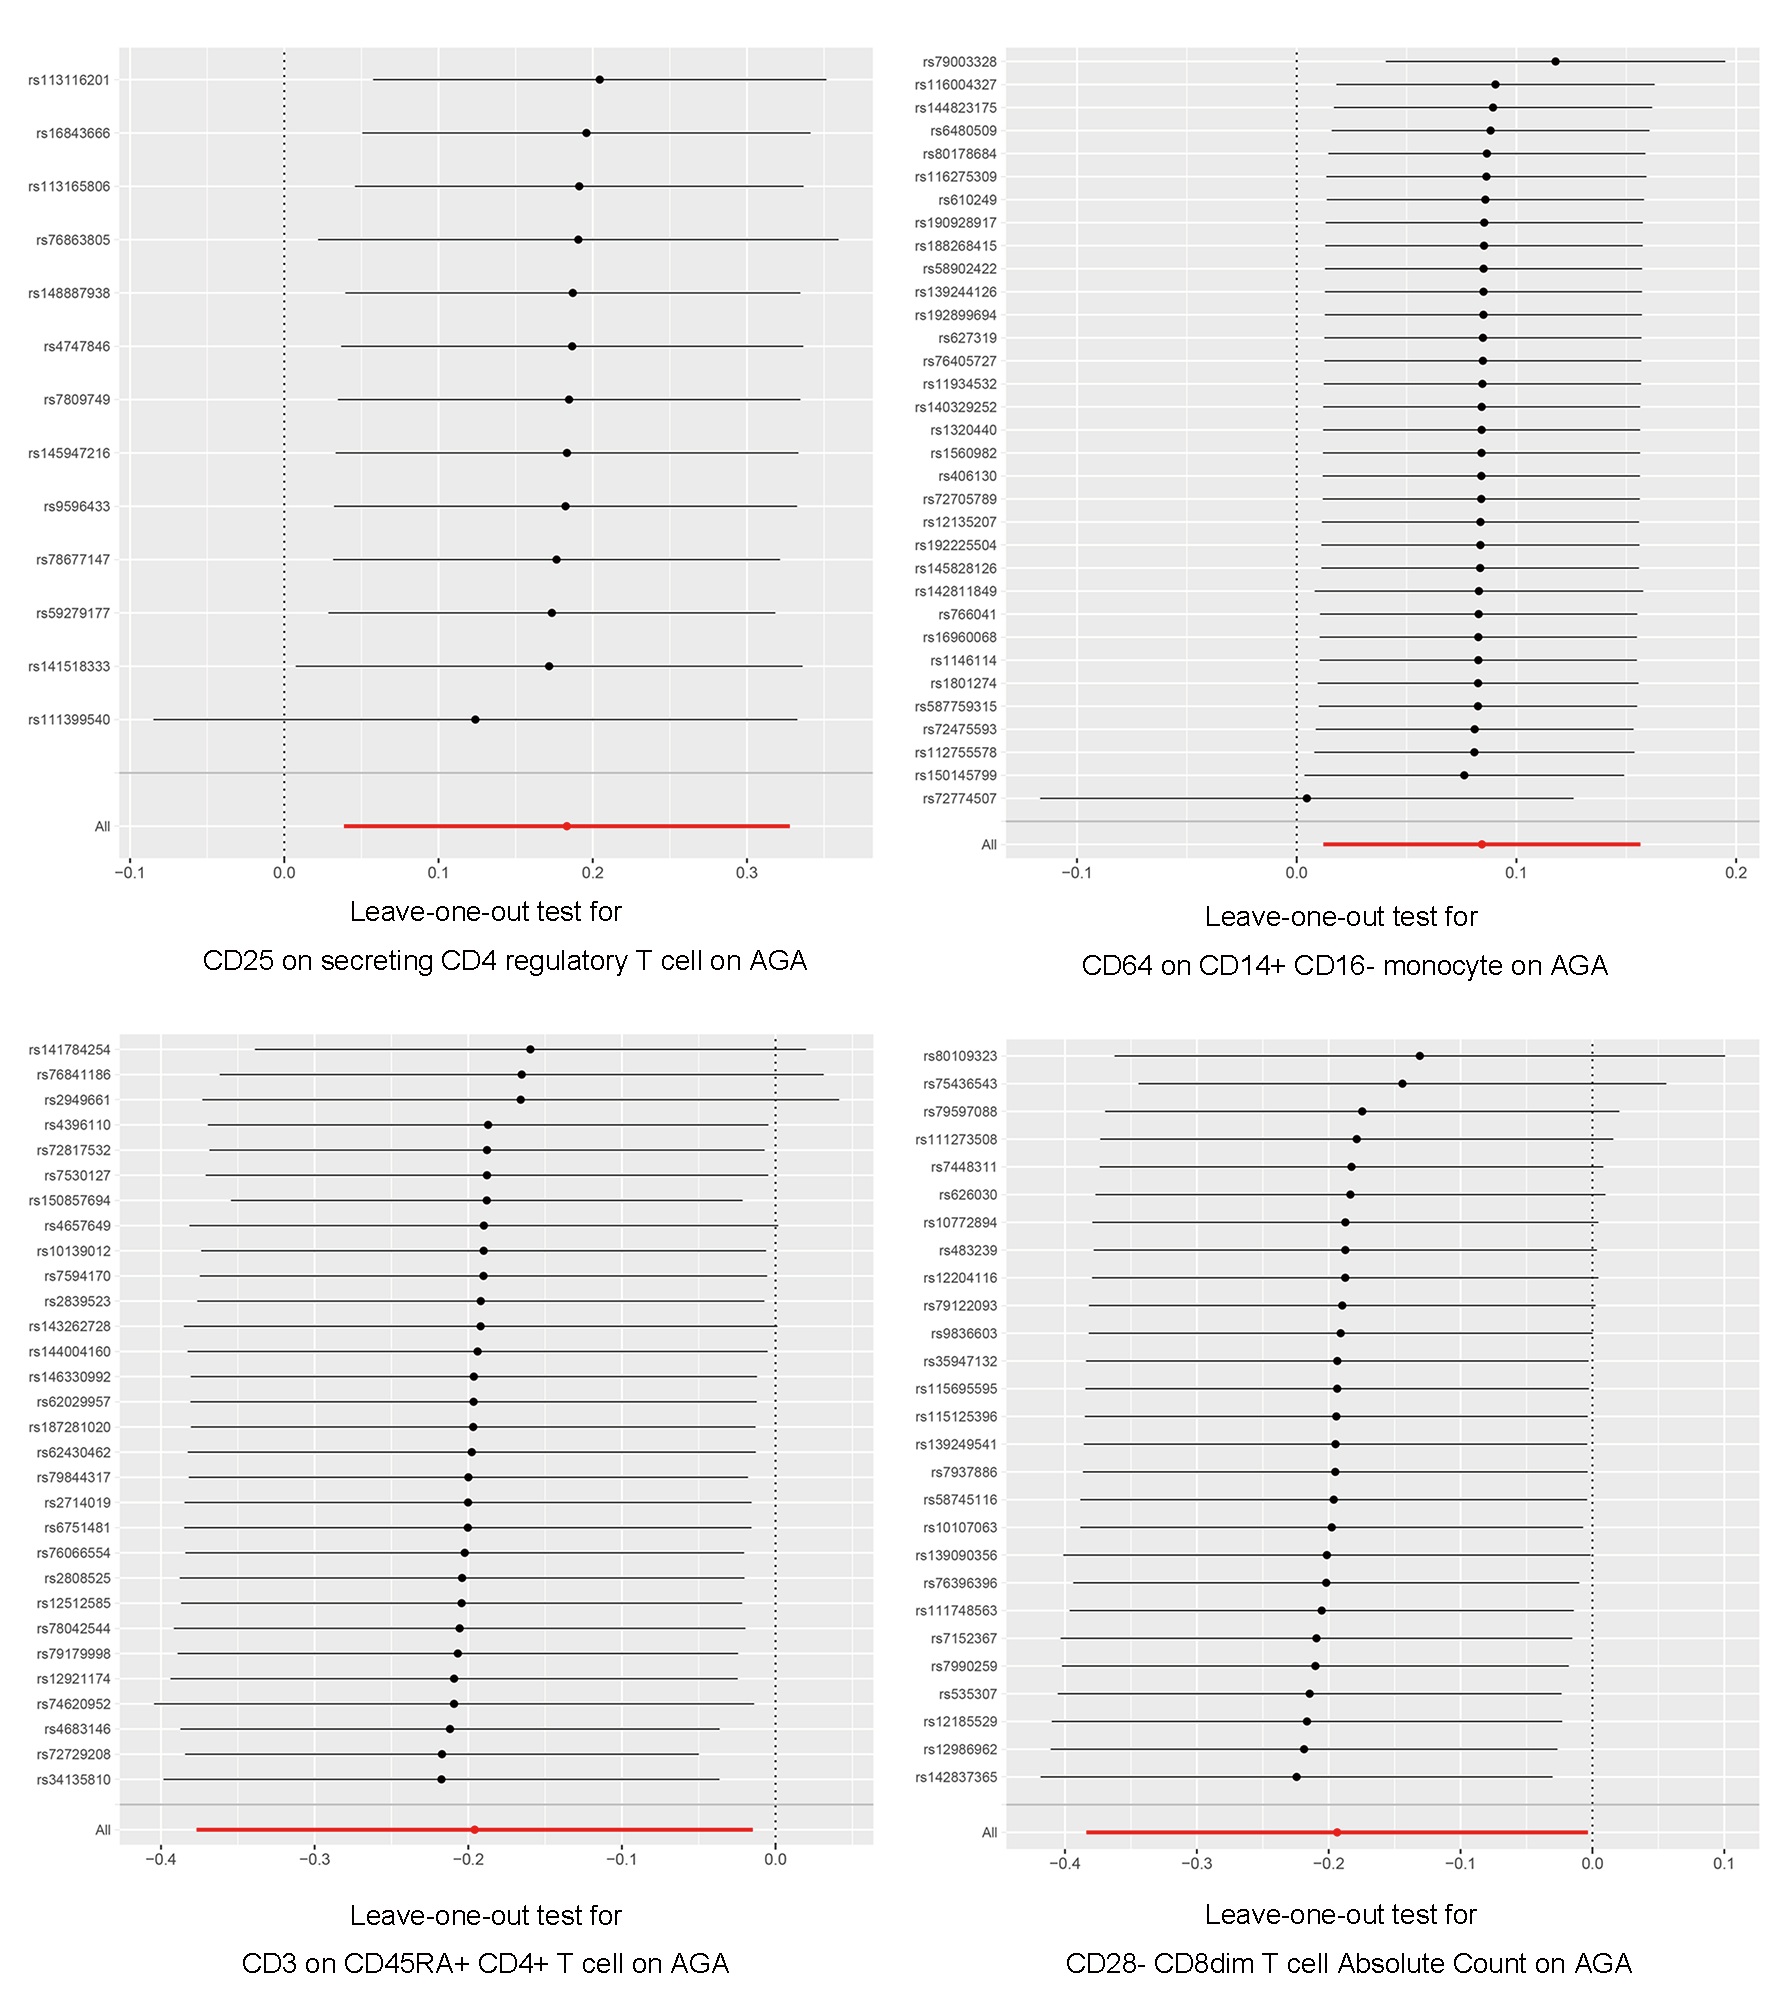


**Figure S1. Leave-one-out sensitivity plots for identified immune phenotypes in relation to AGA.** The red horizontal line represents the overall causal effect estimate (IVW method) using all SNPs in each immunophenotype.
